1 **Title: A humanized yeast phenomic model of deoxycytidine kinase to predict**  
2 **genetic buffering of nucleoside analog cytotoxicity**

3

4 **Author List and Affiliations:**

5 **Sean M. Santos<sup>1</sup>, Mert Icyuz<sup>1</sup>, Ilya Pound<sup>1</sup>, Doreen William<sup>2</sup>, Jingyu Guo<sup>1</sup>, Brett A.**  
6 **McKinney<sup>1</sup>, Michael Niederweis<sup>2</sup>, John Rodgers<sup>1</sup>, John L. Hartman IV<sup>1</sup>**

7 **University of Alabama at Birmingham, <sup>1</sup>Department of Genetics and <sup>2</sup>Department**  
8 **of Microbiology, Birmingham, AL**

9

10 **Abstract:**

11 Knowledge about synthetic lethality can be applied to enhance the efficacy of  
12 anti-cancer therapies in individual patients harboring genetic alterations in their cancer  
13 that specifically render it vulnerable. We investigated the potential for high-resolution  
14 phenomic analysis in yeast to predict such genetic vulnerabilities by systematic,  
15 comprehensive, and quantitative assessment of drug-gene interaction for gemcitabine  
16 and cytarabine, substrates of deoxycytidine kinase that have similar molecular structures  
17 yet distinct anti-tumor efficacy. Human deoxycytidine kinase (dCK) was conditionally  
18 expressed in the *S. cerevisiae* genomic library of knockout and knockdown (YKO/KD)  
19 strains, to globally and quantitatively characterize differential drug-gene interaction for  
20 gemcitabine and cytarabine. Pathway enrichment analysis revealed that autophagy,  
21 histone modification, chromatin remodeling, and apoptosis-related processes influence  
22 gemcitabine specifically, while drug-gene interaction specific to cytarabine was less  
23 enriched in Gene Ontology. Processes having influence over both drugs were DNA  
24 repair and integrity checkpoints and vesicle transport and fusion. Non-GO-enriched  
25 genes were also informative. Yeast phenomic and cancer cell line pharmacogenomics  
26 data were integrated to identify yeast-human homologs with correlated differential gene

27 expression and drug-efficacy, thus providing a unique resource to predict whether  
28 differential gene expression observed in cancer genetic profiles are causal in tumor-  
29 specific responses to cytotoxic agents.

30

31 **Keywords:**

32 **yeast phenomics, gene-drug interaction, genetic buffering, quantitative high**  
33 **throughput cell array phenotyping (Q-HTCP), cell proliferation parameters (CPPs),**  
34 **gemcitabine, cytarabine, recursive expectation-maximization clustering (REMc),**  
35 **pharmacogenomics**

36

37 **Introduction:**

38 Genomics has enabled targeted therapy aimed at cancer driver genes and  
39 oncogenic addiction [1], yet traditional cytotoxic chemotherapeutic agents remain among  
40 the most widely used and efficacious anti-cancer therapies [2]. Changes in the genetic  
41 network underlying cancer can produce vulnerabilities to cytotoxic chemotherapy that  
42 further influence the therapeutic window and provide additional insight into their  
43 mechanisms of action [3,4]. A potential advantage of so-called synthetic lethality-based  
44 treatment strategies is that they could have efficacy against passenger gene mutation or  
45 compensatory gene expression, while classic targeted therapies are directed primarily at  
46 driver genes (**Fig. 1A**). Quantitative high throughput cell array phenotyping of the yeast  
47 knockout and knockdown libraries provides a phenomic means for systems level, high-  
48 resolution modeling of gene interaction [5-9], which is applied here to predict cancer-  
49 relevant drug-gene interaction through integration with cancer pharmacogenomics  
50 resources (**Fig. 1B**).

51 Nucleoside analogs include a diverse group of compounds with anticancer,  
52 antiviral, and immunosuppressive efficacy [10]. The anti-cancer agents have tissue-  
53 specific efficacy ranging from solid tumors to leukemias, yet details about how these  
54 agents confer differential activity are unknown [10,11]. Gemcitabine (2',2'-difluoro 2'-  
55 deoxycytidine, **dFdC**) and cytarabine (**Ara-C**) are deoxycytidine analogs that undergo  
56 the first step of conversion to their active triphosphate forms by deoxycytidine kinase  
57 (**dCK**) (**Fig. 1C**). The nucleoside triphosphate analogs can be incorporated into DNA and  
58 inhibit the functions of polymerases and other enzymes involved of DNA metabolism.  
59 For example, gemcitabine inhibits ribonucleotide reductase (**RNR**), which limits the  
60 production of deoxyribonucleotides (**dNTPs**) that are needed for DNA synthesis and  
61 repair [11]. Gemcitabine has been used as a single agent in the treatment of some  
62 cancers, such as pancreatic, and in combination with platinum-based drugs in non-small  
63 cell lung, breast, and ovarian cancers [12-15]. Cytarabine, on the other hand, has been  
64 an important agent in treatments for acute myeloid leukemia and acute lymphoblastic  
65 leukemia [16].

66 Deoxycytidine kinase (**dCK**) phosphorylates deoxycytidine to deoxycytidine  
67 monophosphate (**dCMP**), similarly phosphorylating gemcitabine and cytarabine to  
68 dFdCMP and AraCMP, respectively. UMP/CMP kinase and the nucleoside diphosphate  
69 kinase are subsequently involved in conversion to the triphosphate form (**Fig. 1C**).  
70 Reduced expression of dCK or high expression of RNR subunits *RRM1* and *RRM2* is  
71 associated with increased gemcitabine resistance [10,12,17-21]. Genomic analyses have  
72 suggested genetic influences on the efficacy of gemcitabine or cytarabine [22-26], which  
73 we model here at a systems level by surveying gene-drug interaction to elucidate biology  
74 underlying differential anti-cancer efficacies of the respective drugs, and thereby aid in  
75 predicting treatment outcomes based on individual patient cancer genetic profiles.

76 *Saccharomyces cerevisiae* does not have a dCK homolog and is thus naturally  
77 resistant to gemcitabine and cytarabine. To examine the gene-drug interaction networks  
78 for gemcitabine and cytarabine in yeast, we introduced human dCK into the yeast  
79 knockout and knockdown (**YKO/KD**) library by the synthetic genetic array (**SGA**) method  
80 [27-29], and conducted phenomic analysis on the resulting double mutant library by  
81 quantitative high throughput cell array phenotyping (**Q-HTCP**) [6-8,30], using multiple  
82 growth inhibitory concentrations of gemcitabine or cytarabine (**Fig. 1B**). Cell proliferation  
83 parameters (**CPPs**) obtained by Q-HTCP were used to quantify and compare drug-gene  
84 interaction for gemcitabine vs. cytarabine. The unbiased results provide a systems level  
85 resource of genetic and biological information about the cytotoxicity of these drugs,  
86 incorporating knowledge about genes that either buffer or promote their effects [3,5]

87 Recent advances in cancer pharmacogenomics have provided gene expression  
88 and drug sensitivity data from hundreds of cancer cell lines, establishing associations  
89 between gene expression and anti-cancer efficacy for many compounds, including  
90 gemcitabine and cytarabine [31-33]. We investigated the potential utility of a yeast  
91 phenomic model of chemotherapy sensitivity and resistance for predicting causality in  
92 correlations between differential gene expression and drug sensitivity by generating a  
93 network-level drug-gene interaction resource. The resource integrates cancer  
94 pharmacogenomic and yeast phenomic data, using the results to query the cancer  
95 genetics literature in order to obtain systems level biological insights about how yeast  
96 phenomic models help predict cytotoxic chemotherapy efficacy based on unique genetic  
97 alterations specific to each individual patient's cancer (**Fig. 1A**).

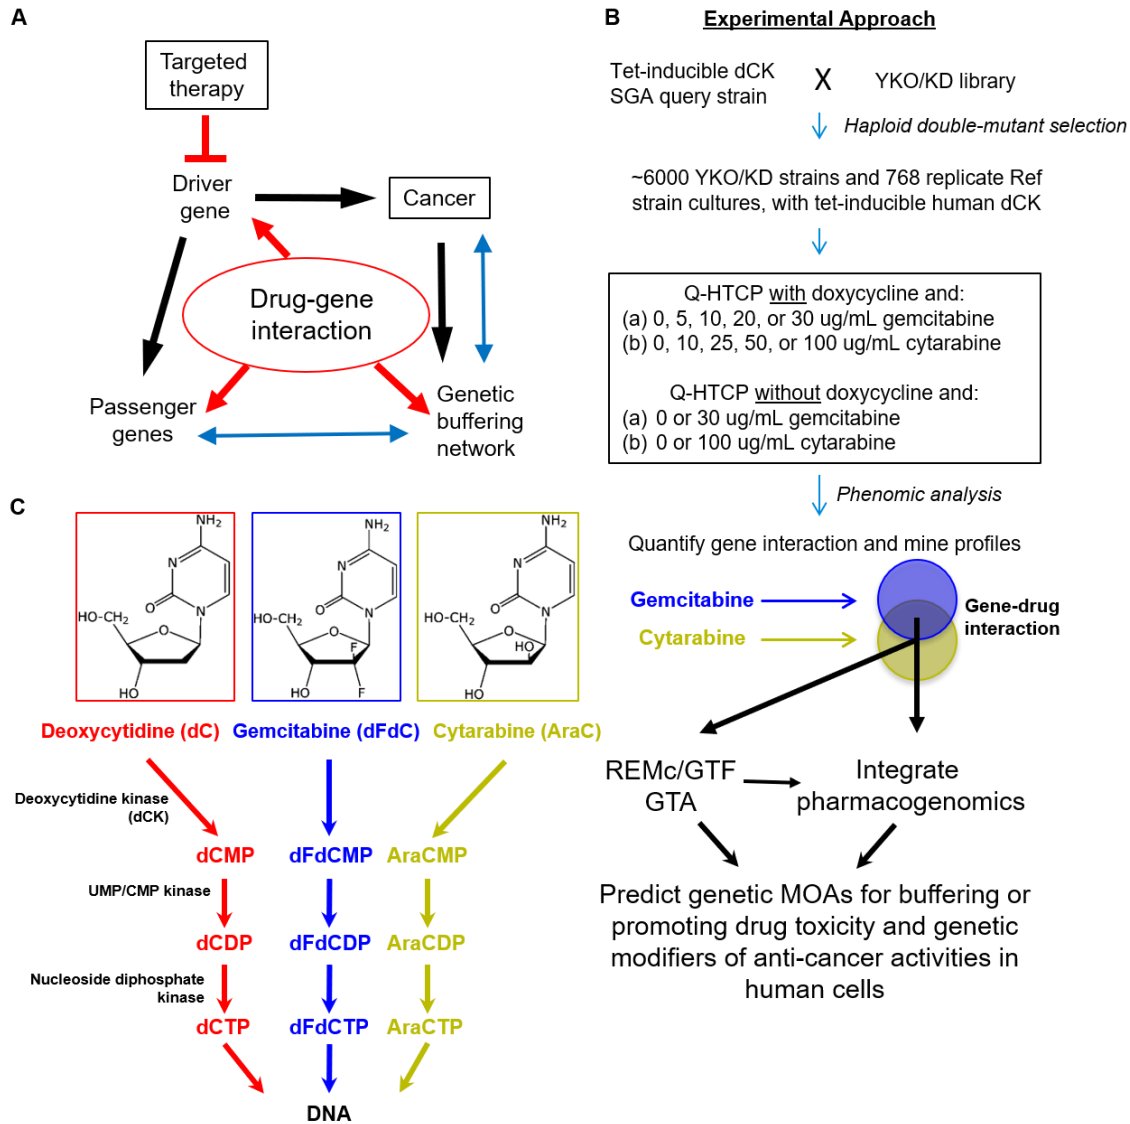

98

99

100 **Figure 1. Experimental model of gemcitabine and cytarabine drug-gene interaction**

101 **networks.** (A) The strategy of cytotoxic anti-cancer drug-gene interaction is illustrated in

102 the context of driver gene-mediated oncogenesis. Driver genes promote cancer and

103 influence the expression of passenger genes (black arrows), which also leads to

104 genomic instability and alterations in the genetic buffering network. The genetic buffering

105 network (blue arrows) maintains cellular homeostasis, and is altered in cancer cells by

106 genomic instability, thereby creating the potential for drug-gene interaction that

107 increases the therapeutic window of anti-cancer agents (red arrows). Drug-gene  
108 interaction can either involve driver or passenger genes directly, or the compromised  
109 genetic buffering network, which are systematically characterized by the quantitative  
110 yeast phenomic model. **(B)** The synthetic genetic array (SGA) method was used to  
111 enable tet-inducible human dCK expression in the yeast knockout and knockdown  
112 (YKO/KD) collection. The phenomic model incorporates treatment of individually grown  
113 cultures of the YKO/KD collection, and 768 replicate Ref strain cultures, with increasing  
114 gemcitabine (0, 5, 10, 20, and 30 ug/mL) or cytarabine (0, 10, 25, 50, and 100 ug/mL) in  
115 HLD media, with dCK induced by addition of doxycycline. Drug-gene interaction profiles  
116 were subjected to REMc and GO term analysis to characterize phenomic modules with  
117 respect to drug-gene interaction for gemcitabine or cytarabine, and integrated with  
118 pharmacogenomics data to predict evolutionarily conserved drug-gene interactions  
119 relevant to precision oncology. **(C)** Structures and metabolism of deoxycytidine analogs.

120 **Materials and Methods:**

121 *Strains, media and drugs*

122 We obtained the yeast gene knockout strain library (**YKO**) from Research  
123 Genetics (Huntsville, AL, USA) and the knockdown (**KD**) collection, also referred to as  
124 the Decreased Abundance of mRNA Production (**DAmP**) library, from Open Biosystems  
125 (Huntsville, AL, USA). The YKO library is in the genetic background of BY4741 (S288C  
126 MATa *ura3-Δ0 his3-Δ1 leu2-Δ0 met17-Δ0*). Additional information and strains can be  
127 obtained at [https://dharmacon.horizondiscovery.com/cdnas-and-orfs/non-mammalian-](https://dharmacon.horizondiscovery.com/cdnas-and-orfs/non-mammalian-cdnas-and-orfs/yeast/#all)  
128 [cdnas-and-orfs/yeast/#all](https://dharmacon.horizondiscovery.com/cdnas-and-orfs/yeast/#all). Some mutants appear multiple times in the library and they  
129 are treated independently in our analysis. HLD is a modified synthetic complete medium  
130 [8] and was used with 2% dextrose (**HLD**) as the carbon source. Doxycycline  
131 hydrochloride (BP26535) was obtained from Fisher Scientific. Gemcitabine (Gemzar)  
132 was obtained from Eli Lilly and Company (0002-7502-01). Cytarabine was obtained from  
133 Bedford Laboratories (55390-131-10).

134 A tet-inducible dCK query allele was constructed in the SGA background in the  
135 following way: An integrating plasmid for doxycycline-inducible gene expression was  
136 constructed by subcloning 3'UTR and 5'ORF targeting sequences from the LYP1 locus  
137 into pJH023 [34], creating pJH023\_UO\_lyp1, and the reverse VP16 transactivator (Tet-  
138 ON), obtained by PCR from pCM176 [35], was fused to the *ACT1* promoter by overlap  
139 PCR and subcloned into pJH023\_UO\_lyp1, replacing the VP16 transactivator (Tet-OFF)  
140 and creating the “Tet-ON” construct, pML1055 [36]. pML1055 was digested with NOT1  
141 and transformed into strain 15578-1.2b\_LYP1 (*MATα his3Δ1 leu2Δ0 ura3Δ0*  
142 *can1Δ0::P<sub>GAL1</sub>-T<sub>ADH1</sub>-P<sub>MFA1</sub>-his5<sup>+</sup><sub>sp</sub> hmrΔ0::URA3ca*), which was derived by backcrossing  
143 15578-1.2b (*MATα his3Δ1 leu2Δ0 ura3Δ0 can1Δ0::P<sub>GAL1</sub>-T<sub>ADH1</sub>-P<sub>MFA1</sub>-his5<sup>+</sup><sub>sp</sub> lyp1Δ0*  
144 *hmrΔ0::URA3ca*) to restore the *LYP1* locus. The resulting chromosomal integration of

145 pML1055 between the promoter and ORF at the *LYP1* locus was selected with  
146 nourseothricin, giving rise to yDW1 (*MAT $\alpha$  his3 $\Delta$ 1 leu2 $\Delta$ 0 ura3 $\Delta$ 0 can1 $\Delta$ 0::P<sub>GAL1</sub>-T<sub>ADH1</sub>-*  
147 *P<sub>MFA1</sub>-his5<sup>+</sup><sub>sp</sub> hmr $\Delta$ 0::URA3ca Pact1-revTetR-VP16-natMX-PtetO7-LYP1*). Tet-inducible  
148 *LYP1* in yDW1 was verified phenotypically by doxycycline-dependent SAEC sensitivity  
149 [36]. Overlap PCR was performed to fuse deoxycytidine kinase (from a plasmid, gift of  
150 Bo Xu and William Parker, Southern Research) and the HPH gene (from pFA6a-HBH-  
151 hphMX4) [37], introducing flanking sequences for replacement of the *LYP1* ORF (see  
152 **Additional File 1, Table S1** for primers). The PCR product was transformed into yDW1  
153 (**Additional File 2, Fig. S1**) and transformants selected on hygromycin were confirmed  
154 by doxycycline-induced sensitivity to gemcitabine and cytarabine, yielding yMI16.

155 The synthetic genetic array (**SGA**) method, a way to introduce an allele of  
156 interest into the YKO/KD library and recover haploid double mutants [28,29], was used to  
157 derive a haploid YKO/KD collection with doxycycline-inducible dCK expression.

158

#### 159 *Quantitative high throughput cell array phenotyping (Q-HTCP)*

160 Q-HTCP, an automated method of collecting growth curve phenotypes for the  
161 YKO/KD library arrayed onto agar media, was used to obtain phenomic data [38]. A  
162 Caliper Sciclone 3000 liquid handling robot was used for cell array printing, integrated  
163 with a custom imaging robot (Hartman laboratory) and Cytomat 6001 (Thermo Fisher  
164 Scientific, Asheville, NC, USA) incubator. Images of the 384-culture arrays were  
165 obtained approximately every 2-3 hours and analyzed as previously described [9,38]. To  
166 obtain CPPs, image analysis was performed in Matlab and data were fit to the logistic  
167 equation,  $G(t) = K/(1 + e^{-r(t-l)})$ , assuming  $G(0) < K$ , where  $G(t)$  is the image intensity of a  
168 spotted culture vs. time,  $K$  is the carrying capacity,  $r$  is the maximum specific growth  
169 rate, and  $l$  is the moment of maximal absolute growth rate, occurring when  $G(t) = K/2$



170 (the time to reach half of carrying capacity) [7]. The CPPs, primarily K and L, were used  
171 as phenotypes to measure drug-gene interaction.

172

### 173 *Quantification of drug-gene interaction*

174 Gene interaction was defined by departure of the corresponding YKO/KD strain  
175 from its expected phenotypic response to gemcitabine or cytarabine. The expected  
176 phenotype was determined by cell proliferation phenotypes of the mutant without  
177 gemcitabine or cytarabine, and with 5ug/mL doxycycline, together with those of the  
178 reference strain with and without gemcitabine or cytarabine [5,6,9,34]. The concentrations  
179 of gemcitabine or cytarabine (ug/mL) were chosen based on phenotypic responses  
180 being functionally discriminating in the parental strain. Gemcitabine, cytarabine, or  
181 doxycycline, alone, did not alter cell proliferation (**Fig. 2C-F; Additional File 2, Fig.**  
182 **S2A-D**).

183 Interaction scores were calculated as previously described [9,39], with slight  
184 modifications, as summarized below. All media conditions used for interaction score  
185 calculation had 5 ug/mL doxycycline to express dCK. Variables were defined as:

186  $D_i$  = concentration (dose) of gemcitabine or cytarabine

187  $R_i$  = observed mean growth parameter for parental Reference strain at  $D_i$

188  $Y_i$  = observed growth parameter for the YKO/KD mutant strain at  $D_i$

189  $K_i = Y_i - R_i$ , the difference in growth parameter between the YKO/KD mutant ( $Y_i$ ) and  
190 Reference ( $R_i$ ) at  $D_i$

191  $K_0 = Y_0 - R_0$ , the effect of gene KO/KD on the observed phenotype in the absence of  
192 gemcitabine or cytarabine; this value is annotated as 'shift' and is subtracted from all  $K_i$   
193 to obtain  $L_i$

194  $L_i = K_i - K_0$ , the interaction between (specific influence of) the KO/KD mutation on  
195 gemcitabine or cytarabine response, at  $D_i$

196 For cultures not generating a growth curve,  $Y_i = 0$  for K and r, and the L  
197 parameter was assigned  $Y_i \text{ max}$ , defined as the maximum observed  $Y_i$  among all  
198 cultures exhibiting a minimum carrying capacity (K) within 2 standard deviation (SD) of  
199 the parental reference strain mean at  $D_i$ .  $Y_i \text{ max}$  was also assigned to outlier values (*i.e.*,  
200 if  $Y_i > Y_i \text{ max}$ ).

201 Interaction was calculated by the following steps:

- 202 1) Compute the average value of the 768 reference cultures ( $R_i$ ) at each dose ( $D_i$ ):
- 203 2) Assign  $Y_i \text{ max}$  (defined above) if growth curve is observed at  $D_0$ , but not at  $D_i$ , or if  
204 observed  $Y_i$  is greater than  $Y_i \text{ max}$ .
- 205 3) Calculate  $K_i = Y_i - R_i$ .
- 206 4) Calculate  $L_i = K_i - K_0$
- 207 5) Fit data by linear regression (least squares):  $L_i = A + B \cdot D_i$
- 208 6) Compute the interaction value 'INT' at the max dose:  $\text{INT} = L_i - \text{max} = A + B \cdot D_{\text{max}}$
- 209 7) Calculate the mean and standard deviation of interaction scores for reference strains,  
210  $\text{mean}(\text{REF}_{\text{INT}})$  and  $\text{SD}(\text{REF}_{\text{INT}})$ ;  $\text{mean}(\text{REF}_{\text{INT}})$  is expected to be approximately zero, with  
211  $\text{SD}(\text{REF}_{\text{INT}})$  primarily useful for standardizing against variance (**Additional File 1,**  
212 **Tables S2-S5; Additional Files 3-4).**

213 8) Calculate interaction z-scores:

$$214 \quad z\text{-score}(\text{YKO}_{\text{INT}}) = (\text{YKO}_{\text{INT}} - \text{mean}(\text{REF}_{\text{INT}})) / \text{SD}(\text{REF}_{\text{INT}})$$

215  $z\text{-score}(\text{YKO}_{\text{INT}}) > 2$  for L or  $< -2$  for K are referred to as gene deletion enhancers  
216 of gemcitabine or cytarabine cytotoxicity, and conversely, L interaction score  $< -2$  or K  
217 interaction scores  $> 2$  are considered gene deletion suppressors. Because the CPP  
218 distributions for KD strains were different from the reference strain, we used the mean  
219 and standard deviation from the KD plates only as a conservative measure of variance  
220 where  $z\text{-score}(\text{KD}_{\text{INT}}) = (\text{KD}_{\text{INT}} - \text{mean}(\text{KD}_{\text{INT}})) / \text{SD}(\text{KD}_{\text{INT}})$ .

221

222 *Recursive expectation-maximization clustering (REMc) and heatmap generation*

223 REMc is a probability-based clustering method and was performed as previously  
224 described [40]. Clusters obtained by Weka 3.5, an EM-optimized Gaussian mixture-  
225 clustering module, were subjected to hierarchical clustering in R ([http://www.r-](http://www.r-project.org/)  
226 [project.org/](http://www.r-project.org/)) to further aid visualization with heatmaps. REMc was performed using L  
227 and K interaction z-scores (**Fig. 3A**). The effect of gene deletion on the CPP (in the  
228 absence of drug), termed 'shift' ( $K_0$ ), was not used for REMc, but was included for  
229 visualization in the final hierarchical clustering. **Additional File 5, Files A-B** contain  
230 REMc results in text files with associated data also displayed as heatmaps. In cases  
231 where a culture did not grow in the absence of drug, 0.0001 was assigned as the  
232 interaction score, so that associated data ('NA') could be easily indicated by red coloring  
233 in the shift columns of the heatmaps.

234

235 *Gene ontology term finder (GTF)*

236 A python script was used to format REMc clusters for analysis with the command  
237 line version of the GO Term Finder (**GTF**) tool downloaded from  
238 <http://search.cpan.org/dist/GO-TermFinder/> [41]. GTF reports on enrichment of Gene  
239 Ontology (**GO**) terms by comparing the ratio of genes assigned to a term within a cluster  
240 to the respective ratio involving all genes tested. **Additional File 5, File C** contains GTF  
241 analysis of all REMc clusters. GO-enriched terms from REMc were investigated with  
242 respect to genes representing the term and literature underlying their annotations [42].

243

244 *Gene ontology term averaging (GTA) analysis*

245 In addition to using GTF to survey functional enrichment in REMc clusters, we  
246 developed GTA as a complementary workflow, using the GO information on SGD at  
247 <https://downloads.yeastgenome.org/curation/literature/> to perform the following analysis:

- 248 1. Calculate the average and SD for interaction values of all genes in a GO term.  
249 2. Filter results to obtain terms having GTA value greater than 2 or less than -2.  
250 3. Obtain GTA scores defined as  $|GTA\ value| - gtaSD$ ; filter for GTA score  $> 2$ .

251 The GTA analysis is contained in **Additional File 6** as tables and interactive plots  
252 created using the R *plotly* package <https://CRAN.R-project.org/package=plotly>. GTA  
253 results were analyzed using both the L and K interaction scores and are included in  
254 **Additional File 6 (Files A-C)**.

255

256 *Prediction of human homologs that influence tumor response to gemcitabine or*  
257 *cytarabine*

258 PharmacoDB holds pharmacogenomics data from cancer cell lines, including  
259 transcriptomics and drug sensitivity [33]. The *PharmacoGx* R/Bioconductor package [43]  
260 was used to analyze the GDSC1000 (<https://pharmacodb.pmgenomics.ca/datasets/5>)  
261 and gCSI (<https://pharmacodb.pmgenomics.ca/datasets/4>) datasets, which contained  
262 transcriptomic and drug sensitivity results. A p-value  $< 0.05$  was used for differential  
263 gene expression and drug sensitivity. For gene expression, the sign of the standardized  
264 coefficient denotes increased (+) or decreased (-) expression. The *biomaRt* R package  
265 [44,45] was used with the Ensembl database [46] to match yeast and human homologs  
266 from the phenomic and transcriptomic data, classifying yeast-human homology as one to  
267 one, one to many, and many to many. The Princeton Protein Orthology Database  
268 (PPOD) was also used to manually review and further consider homology [47].

269

270 **Results:**

271 **Quantitative phenomic characterization of differential gene-drug interaction**

272 The Q-HTCP workflow incorporates high-throughput kinetic imaging and analysis  
273 of proliferating 384-culture cell arrays plated on agar media to obtain CPPs for

274 measuring gene-drug interaction, as previously described [7,9,38]. To apply it for analysis  
275 of dCK substrates, a tetracycline-inducible human dCK allele was introduced into the  
276 complete YKO/KD library by the synthetic genetic array method [29,48] (**Figure 1B**). The  
277 dependence of gemcitabine and cytarabine toxicity on dCK expression was  
278 demonstrated for the reference strain (**Fig. 2A-F**), as the two nucleosides exerted  
279 cytotoxicity only if dCK was induced by the addition of doxycycline. Induction of dCK had  
280 no effect on proliferation in the absence of gemcitabine or cytarabine (**Fig. 2C-F**).

281 Interaction scores were calculated by departure of the observed CPP for each  
282 YKO/KD strain from that expected based on the observed phenotypes for the reference  
283 strain treated and untreated with drug and the YKO/KD strain in the absence of drug,  
284 incorporating multiple drug concentrations, 768 replicate reference strain control  
285 cultures, and summarized by linear regression as z-scores [6-8,30,34,38]. Gene  
286 interaction scores with absolute value greater than two were selected for global analysis  
287 and termed deletion enhancers ( $z\text{-score}_L \geq 2$  or  $z\text{-score}_K \leq -2$ ) or deletion  
288 suppressors ( $z\text{-score}_L \leq -2$  or  $z\text{-score}_K \geq 2$ ) of drug cytotoxicity, revealing functions  
289 that buffer or promote drug cytotoxicity, respectively [39] (**Fig. 2**).

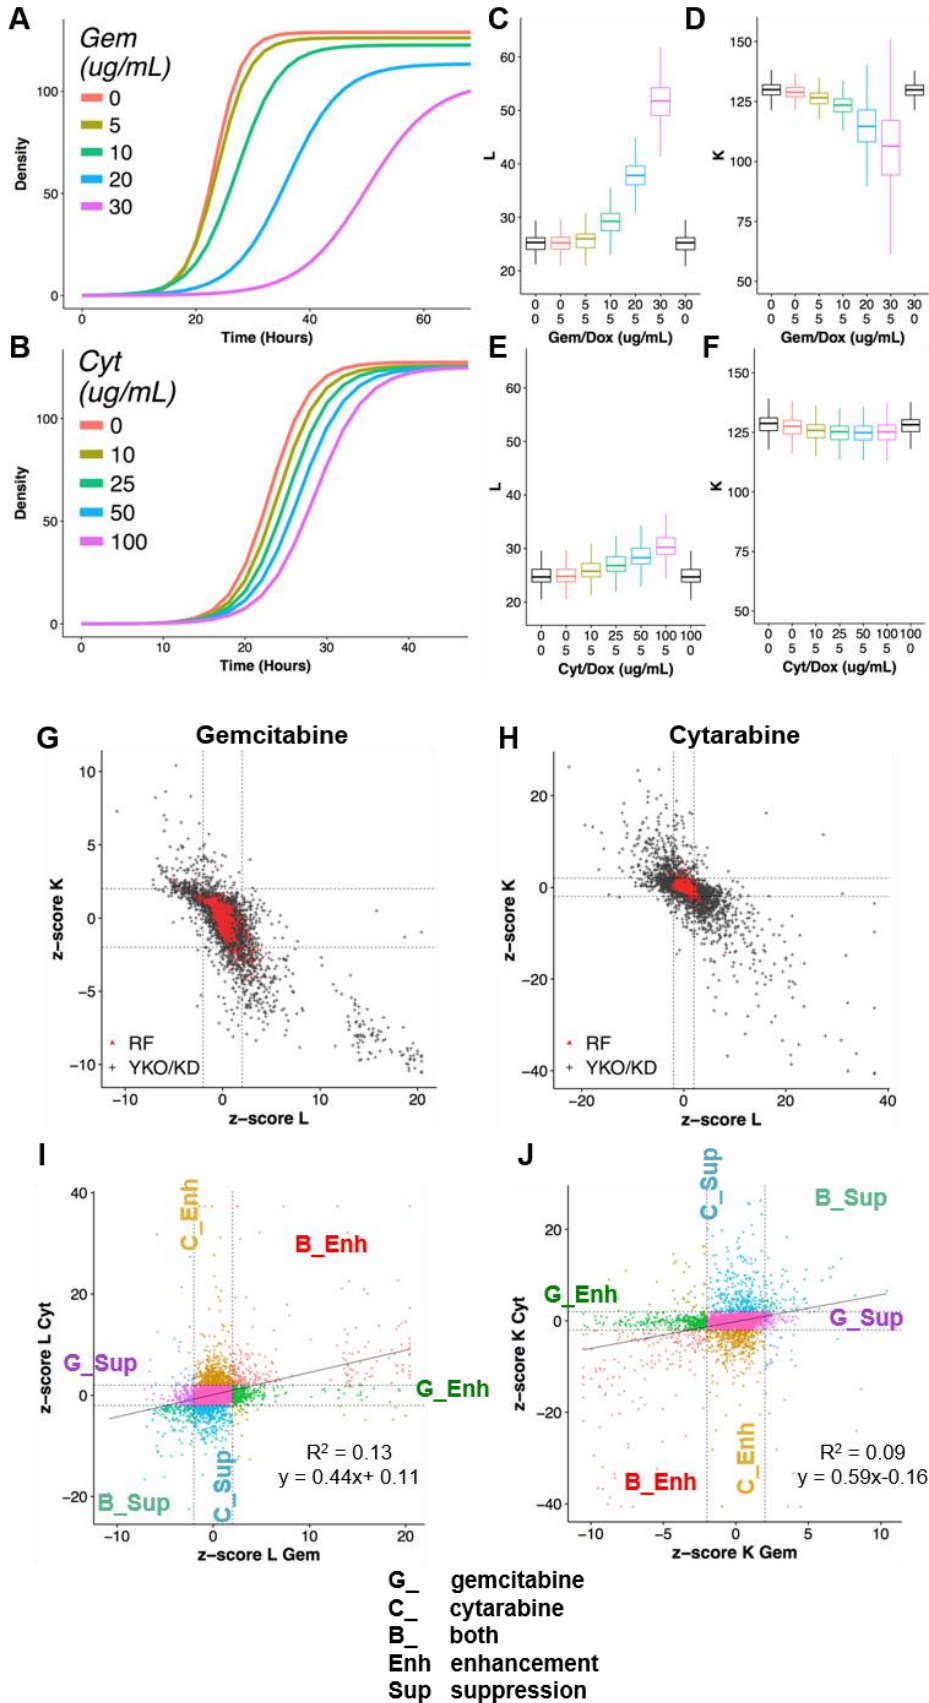

291 **Figure 2. Phenomic analysis of drug-gene interaction for gemcitabine and**  
292 **cytarabine.** Average growth curves (from fitting pixel intensity data of 768 replicate  
293 cultures to a logistic function) for the reference (RF) strain, treated with the indicated  
294 concentrations of **(A)** gemcitabine or **(B)** cytarabine. **(C-F)** CPP distributions from data  
295 depicted in panels A and B for **(C-D)** gemcitabine and **(E-F)** cytarabine for **(C, E)** L and  
296 **(D, F)** K. **(G, H)** Comparison of drug-gene interaction scores using either the L or K  
297 CPPs for **(G)** gemcitabine and **(H)** cytarabine. Score distributions of  
298 knockout/knockdown (YKO/KD, black) and non-mutant parental (Ref, red) strain cultures  
299 are indicated along with thresholds for deletion enhancement and suppression (dashed  
300 lines at  $\pm 2$ ). **(I-J)** Differential drug-gene interaction using L **(I)** or K **(J)** as the CPP for  
301 gemcitabine vs. cytarabine, classified with respect to relative drug specificity of  
302 interactions. 'G', 'C', and 'B' indicate gemcitabine-, cytarabine-, or both drug-gene  
303 interactions, respectively. Deletion enhancement or suppression is indicated by '\_Enh' or  
304 '\_Sup', respectively.

305 Growth inhibition was greater for gemcitabine than for cytarabine (**Fig. 2A-F**),  
306 however, the phenotypic variance was also less for cytarabine, such that interactions of  
307 smaller effect size were detectable and the range of scores was greater (**Additional File**  
308 **1, Table S6**). The CPP, 'L', (the time at which half carrying capacity is reached), is most  
309 sensitive to growth inhibitory perturbation, while 'K' (carrying capacity) reports on more  
310 extreme growth differences (**Fig. 2A-H**). Low correlation between the gene-drug  
311 interaction profiles suggested differential buffering of these two drugs, consistent with  
312 their distinct anti-tumor efficacies (**Fig. 2I-J**).

313

#### 314 **Functional analysis of gene-interaction modules**

315 Recursive expectation-maximization clustering (**REMc**) was used to identify  
316 modules of genes that shared similar profiles of buffering or promoting nucleoside  
317 toxicity of gemcitabine or cytarabine [40] (see **Fig. 3A-F; Table 1; Additional File 5**). As  
318 described previously, REMc results were assessed with GO Term Finder for Gene  
319 Ontology functional enrichment [41] and heatmaps generated by first adding data  
320 regarding the main effect of the gene knockout or knockdown (*i.e.*, no drug) on cell  
321 proliferation, termed 'shift' (see methods), followed by hierarchical clustering [40,41]. GO  
322 Term Average (**GTA**) scores, which are based on the average and standard deviation of  
323 drug-gene interaction for all genes of each GO term [39], were used as a complement to  
324 REMc/GTF for identifying functions that buffer or promote drug effects (**Table 2, Fig. 4,**  
325 **and Additional File 6, Files A-C**). Yeast-human homologs were judged, regarding  
326 causality of differential gene expression associated with sensitivity to gemcitabine or  
327 cytarabine, by the correspondence of yeast phenomic and cancer pharmacogenomics  
328 results, thus establishing a model resource to test the utility of yeast phenomics to inform  
329 cancer genetic profiling for predicting drug-specific, anti-tumor efficacy (**Fig. 3G-H**).



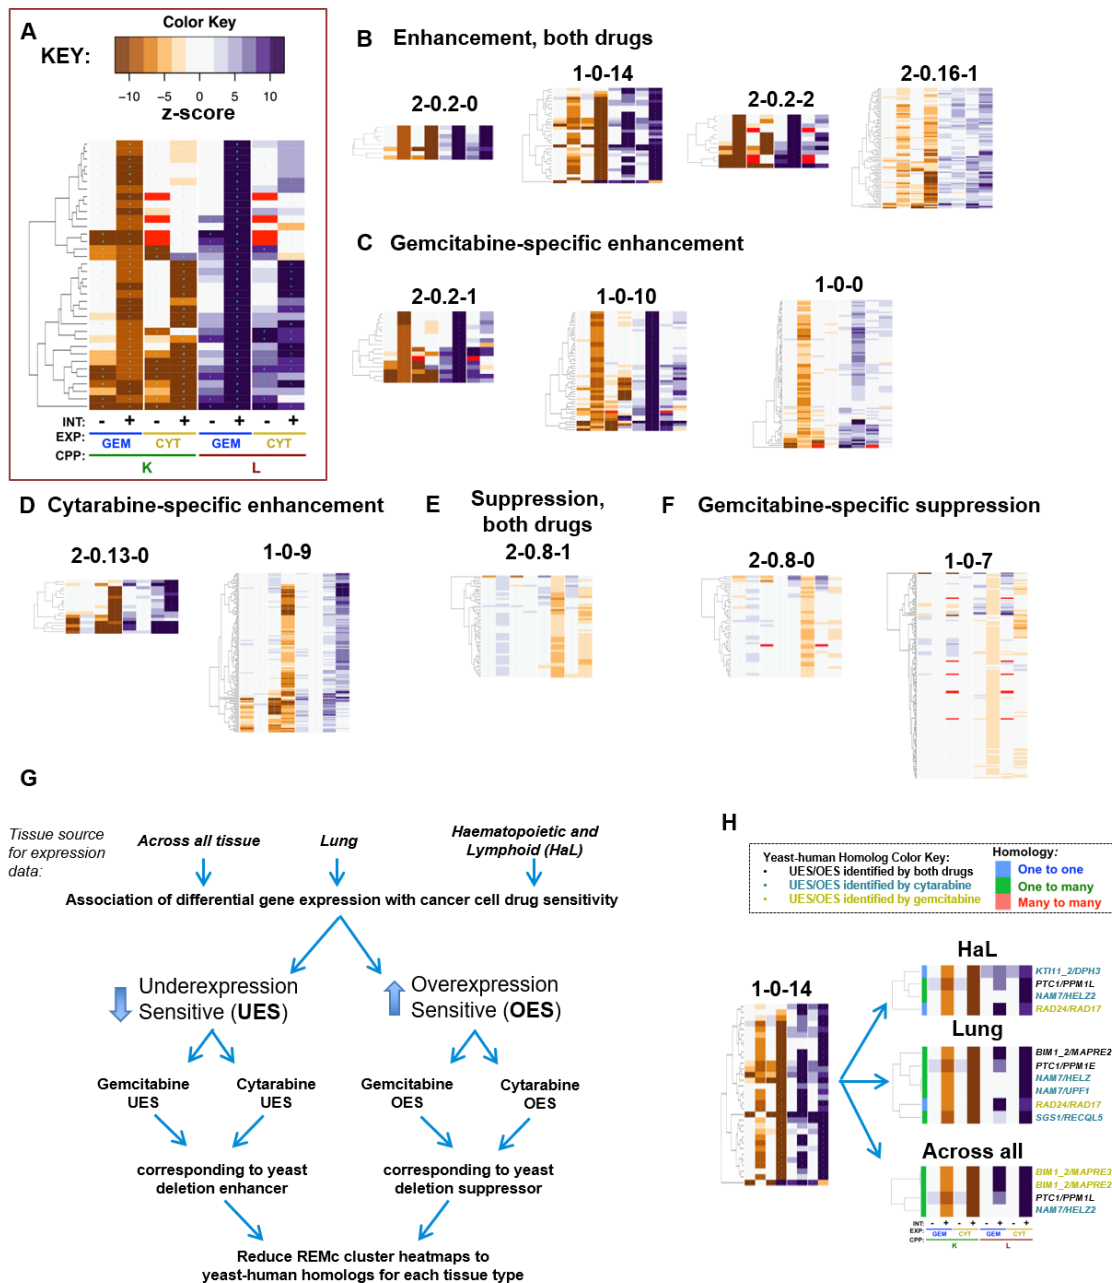

330

331 **Figure 3. Prediction of drug-gene interaction in cancer cells by integration of yeast**

332 **phenomic and human pharmacogenomic data.** Recursive expectation-maximization

333 clustering results were classified visually by their associated gene interaction profiles

334 (see methods). **(A)** The data columns in all heatmaps are ordered from left to right, as

335 shown in this example. K interactions for gemcitabine and cytarabine are in columns 2

336 and 4, respectively, with L interactions in columns 6 and 8. To the left of each interaction

337 value (indicated by '+'), is the corresponding 'shift' value (indicated by '-'), referring to the  
338  $\Delta$ CPP for the respective YKO/KD culture relative to the reference culture average in the  
339 absence of gemcitabine or cytarabine (see methods). **(B-F)** The relative strength of  
340 example clusters is ordered from left to right. **(B)** Enhancement, both drugs. **(C)**  
341 Gemcitabine-specific enhancement. **(D)** Cytarabine-specific enhancement. **(E)**  
342 Suppression, both drugs. **(F)** Gemcitabine-specific suppression. **(G)** Differential gene  
343 expression for cell lines from the GDSC database (either lung, hematopoietic and  
344 lymphoid, or across all tissues) was categorized in drug-sensitive cells as either  
345 underexpressed (**UES**) or overexpressed (**OES**), and filtered by correlation with yeast  
346 homologs being deletion enhancing or suppressing, respectively. **(H)** An example of  
347 yeast-human homologs identified as described in **G**. The category of homology assigned  
348 by *BiomaRt* is indicated in the left column of each heatmap (see homology color key). At  
349 right, the gene label indicates whether the human homolog was verified in PharmacoDB  
350 for both drugs (black), cytarabine (teal), or gemcitabine (gold). **Additional Files 5 (File**  
351 **B) and 8 (Files B-D)** contains all REMc heatmaps of the types indicated to the left and  
352 right, respectively, in panel H.

353  
354

**Table 1. GO terms enriched in REMc clusters.**

| GO Term                                                         | Drug | INT | O | Cluster  | Genes in Term | p-value  | Genes                     | Fig | GTA Gem L | GTA Cyt L |
|-----------------------------------------------------------------|------|-----|---|----------|---------------|----------|---------------------------|-----|-----------|-----------|
| Ubp3-Bre5 deubiquitination complex                              | Both | Enh | C | 2-0.2-0  | 2/2           | 2.57E-05 | UBP3:BRE5                 | 5D  | 19.8      | 14.32     |
| positive regulation of DNA-dependent DNA replication initiation | Both | Enh | P | 1-0-2    | 3/4           | 2.09E-04 | RFM1:FKH2:SUM1            | 5B  | 15.7      | 4.9       |
| Mre11 complex                                                   | Both | Enh | C | 2-0.14-1 | 2/3           | 5.66E-04 | RAD50:XRS2                | 5B  | 13.7      | 26.6      |
| HOPS complex                                                    | Both | Enh | C | 2-0.14-1 | 2/7           | 3.94E-03 | PEP3:VPS33                | 5D  | 12.0      | 4.8       |
| CORVET complex                                                  | Both | Enh | C | 2-0.14-1 | 2/7           | 3.94E-03 | PEP3:VPS33                | 5D  | 10.4      | 4.3       |
| RecQ helicase-Topo III complex                                  | Both | Enh | C | 1-0-14   | 2/3           | 3.31E-03 | SGS1:RMI1                 | 5B  | 7.5       | 14.6      |
| GET complex                                                     | Both | Enh | C | 2-0.14-0 | 2/3           | 4.68E-04 | GET1:GET2                 | 5D  | 3.3       | 18.6      |
| DNA integrity checkpoint                                        | Both | Enh | P | 1-0-14   | 4/40          | 3.85E-03 | DUN1:RAD17:RAD24:SGS1     | 5A  | 4.8       | 4.8       |
| alpha-glucoside transmembrane transporter activity              | Cyt  | Enh | F | 2-0.17-3 | 2/2           | 5.98E-03 | MAL31:MAL11               | 7A  | -0.7      | 2.2       |
| intraluminal vesicle formation                                  | Gem  | Enh | P | 1-0-10   | 3/7           | 2.90E-03 | DOA4:VPS24:BRO1           | 6A  | 9.0       | 1.6       |
| HDA1 complex                                                    | Gem  | Enh | C | 1-0-0    | 2/3           | 7.08E-02 | HDA1:HDA3                 | 6B  | 4.8       | 0.3       |
| Swr1 complex                                                    | Gem  | Enh | C | 1-0-11   | 3/12          | 3.46E-02 | SWC3:VPS71:SWR1           | 6B  | 2.9       | -1.6      |
| peptidyl-tyrosine dephosphorylation                             | Gem  | Enh | P | 1-0-0    | 5/20          | 2.18E-03 | OCA2:SIW14:OCA1:OCA4:OCA6 | 6C  | 1.5       | 0.5       |
| Set1C/COMPASS complex                                           | Gem  | Enh | C | 1-0-0    | 3/6           | 5.74E-03 | SDC1:SWD3:BRE2            | 6B  | 1.0       | 0.6       |
| phospholipid-translocating ATPase activity                      | Gem  | Sup | F | 1-0-8    | 3/7           | 9.70E-03 | DRS2:LEM3:DNF2            | 6D  | -1.6      | -0.9      |

355  
356  
357  
358  
359  
360

For each GO term, the table indicates which drugs interact with it, the interaction type (enhancing or suppressing), the ontology ('O') it derives from (cellular Process or Component, or molecular Function), the REMc cluster ID from which the term was most specific, the fraction of the genes in the term that were observed in the cluster and the p-value for enrichment of the genes. Relevant figures and associated GTA data are also given.

361 **Table 2. GO terms identified by GTA.**

362

| Term                                                               | Drug | INT_type | Ont | Cluster  | p-value  | Genes                                                | Fig | Gem<br>GTA_K | Gem<br>GTA_L | Cyt<br>GTA_K | Cyt<br>GTA_L |
|--------------------------------------------------------------------|------|----------|-----|----------|----------|------------------------------------------------------|-----|--------------|--------------|--------------|--------------|
| checkpoint clamp complex                                           | Both | Enh L/K  | C   | NA       | NA       | RAD17   MEC3                                         | 5B  | <b>-7.3</b>  | <b>13.8</b>  | <b>-23.5</b> | <b>15.4</b>  |
| HOPS complex                                                       | Both | Enh L/K  | C   | 2-0.14-1 | 3.94E-03 | VPS16   VPS8   PEP3   VPS41   VPS33<br>  PEP5        | 5D  | <b>-6.3</b>  | 12.0         | -11.4        | 4.8          |
| Mre11 complex                                                      | Both | Enh L/K  | C   | 2-0.14-1 | 5.66E-04 | MRE11   RAD50   XRS2                                 | 5B  | <b>-8.8</b>  | 13.7         | -39.3        | 26.6         |
| RecQ helicase-Topo III complex                                     | Both | Enh L/K  | C   | 1-0-14   | 3.31E-03 | RMI1   SGS1   TOP3                                   | 5B  | <b>-7.7</b>  | 7.5          | -24.7        | 14.6         |
| Ubp3-Bre5 deubiquitination complex                                 | Both | Enh L/K  | C   | 2-0.2-0  | 2.57E-05 | UBP3   BRE5                                          | 5D  | <b>-9.2</b>  | 19.8         | -16.9        | 14.3         |
| vesicle fusion with vacuole                                        | Both | Enh L/K  | P   | NA       | NA       | VAM3   VPS33                                         | 5D  | <b>-7.4</b>  | 13.3         | -11.4        | 7.1          |
| Sec61 translocon complex                                           | Cyt  | Enh K    | C   | NA       | NA       | SEC61   SBH2                                         | 7A  | <b>-0.4</b>  | 1.1          | -5.1         | 1.9          |
| HIR complex                                                        | Cyt  | Enh L    | C   | NA       | NA       | HIR1   HIR2   HPC2   HIR3                            | 7A  | <b>-1.0</b>  | 1.0          | -0.6         | 2.5          |
| sphinganine kinase activity                                        | Cyt  | Enh L    | F   | NA       | NA       | LCB4   LCB5                                          | 7A  | <b>-0.1</b>  | 0.3          | -1.2         | 3.9          |
| protein localization to septin ring                                | Cyt  | Enh L/K  | P   | NA       | NA       | ELM1   HSL1                                          | 7A  | <b>-1.3</b>  | 2.5          | -17.8        | 21.9         |
| autophagosome maturation                                           | Gem  | Enh K    | P   | NA       | NA       | VAM3   CCZ1                                          | 6A  | <b>-5.6</b>  | 7.7          | -1.6         | 2.5          |
| Elongator holoenzyme complex                                       | Gem  | Enh K    | C   | NA       | NA       | TUP1   ELP4   ELP2   IKI3   IKI1   ELP3<br>  ELP6    | S4C | <b>-3.6</b>  | 3.4          | -2.6         | 2.5          |
| ESCRT I complex                                                    | Gem  | Enh K    | C   | NA       | NA       | STP22   VPS28   SRN2   MVB12                         | 5D  | <b>-6.9</b>  | 9.1          | -0.8         | 2.5          |
| negative regulation of macroautophagy                              | Gem  | Enh K    | P   | NA       | NA       | PHO85   PHO80   KSP1   PCL5   SIC1                   | 6A  | <b>-5.8</b>  | 9.4          | -4.1         | 1.8          |
| protein urmylation                                                 | Gem  | Enh K    | P   | NA       | NA       | ELP2   UBA4   NCS2   URM1   URE2  <br>ELP6           | S4C | <b>-3.7</b>  | 1.5          | 1.0          | 1.2          |
| CORVET complex                                                     | Gem  | Enh L/K  | C   | 2-0.14-1 | 3.94E-03 | VPS16   VPS8   PEP3   VPS41   VPS33<br>  VPS3   PEP5 | 5D  | <b>-6.6</b>  | 10.4         | -10.4        | 4.3          |
| ESCRT-0 complex                                                    | Gem  | Enh L/K  | C   | NA       | NA       | VPS27   HSE1                                         | 5D  | <b>-5.7</b>  | 10.4         | -3.9         | 2.6          |
| HDA1 complex                                                       | Gem  | Enh L/K  | C   | 1-0-0    | 7.08E-02 | HDA3   HDA1   HDA2                                   | 6B  | <b>-4.8</b>  | 4.8          | -0.6         | 0.3          |
| GATOR (Iml1) complex                                               | Gem  | Enh L/K  | C   | NA       | NA       | NPR2   NPR3                                          | 6A  | <b>-4.4</b>  | 6.4          | 1.0          | 2.2          |
| intraluminal vesicle formation                                     | Gem  | Enh L/K  | P   | 1-0-10   | 2.90E-03 | VPS20   VPS24   BRO1   DOA4   VPS4<br>  SNF7         | 6A  | <b>-5.7</b>  | 9.0          | -1.8         | 1.6          |
| positive regulation of DNA-dependent DNA replication<br>initiation | Gem  | Enh L/K  | P   | 1-0-2    | 2.09E-04 | SUM1   FKH2   RFM1   FKH1                            | 5B  | <b>-8.1</b>  | 15.7         | -2.4         | 4.9          |
| RAVE complex                                                       | Gem  | Enh L/K  | C   | NA       | NA       | RAV1   RAV2                                          | 6A  | <b>-4.2</b>  | 3.5          | 0.6          | -0.2         |
| GARP complex                                                       | Gem  | Sup L    | C   | NA       | NA       | VPS51   VPS53   VPS54   VPS52                        | 6D  | <b>1.7</b>   | -3.4         | 1.5          | -1.0         |
| Lem3p-Dnf1p complex                                                | Gem  | Sup L    | C   | NA       | NA       | DNF1   LEM3                                          | 6D  | <b>1.6</b>   | -3.4         | -0.1         | 0.2          |
| phosphatidylserine biosynthetic process                            | Gem  | Sup L    | C   | NA       | NA       | DEP1   CHO1   UME6                                   | 6D  | <b>2.6</b>   | -3.7         | 0.8          | -0.3         |

363

364 See Table 1 for data descriptions. 'NA' indicates terms identified by GTA only (i.e., not identified by REMc/GTF).

365

366 Heatmaps were also produced systematically to visualize drug-gene interaction profiles  
367 for all genes assigned to GO terms identified by REMc/GTF or GTA; these are referred  
368 to as term-specific heatmaps, and are grouped by GO term parent-child relationships  
369 (**Additional File 7**).

370 Cancer pharmacogenomics data in PharmacoDB were mined using *PharmacoGx*  
371 [43] and *biomaRt* [44,45] with the GDSC1000 [31,49] or gCSI [32,50] datasets to match  
372 yeast drug-gene interaction by homology to differential gene expression in gemcitabine  
373 or cytarabine sensitive cancer cell lines (**Fig. 3G-H; Additional File 8**). Yeast gene  
374 deletion enhancers identified human homologs underexpressed in gemcitabine or  
375 cytarabine sensitive cells, termed UES, while yeast gene deletion suppressors identified  
376 human homologs overexpressed in drug sensitive cells, termed OES (**Fig. 3G**).

377 The analysis was focused on the GDSC database, because it had expression  
378 data available for both gemcitabine and cytarabine; however, analysis of the gCSI data  
379 was also conducted for gemcitabine (**Additional File 8, File A**). Differential expression  
380 was analyzed: (1) across all tissue types, to consider interactions that might be  
381 applicable in novel treatment settings; (2) in hematopoietic & lymphoid tissue; and (3) in  
382 lung tissue, as cytarabine and gemcitabine are used to treat HaL and lung cancers,  
383 respectively. Gemcitabine is also used for pancreatic cancer; however, the number of  
384 cell lines tested (30) was lower than for lung (156) or HaL (152). Thus, yeast genes that  
385 were deletion enhancing or suppressing were catalogued with human homologs that  
386 were UES or OES in PharmacoDB (**Figs. 3G-H, Tables 3-5, and Additional File 8**).

387 In summary REMc, GTF, and GTA revealed functional genetic modules that  
388 alternatively buffer (deletion enhancing) or promote (deletion suppressing) drug  
389 cytotoxicity [5,40,51], and illustrated whether the effects were shared or differential  
390 between gemcitabine and cytarabine (**Fig. 4**). Yeast phenomic information was  
391 integrated with pharmacogenomics data results according to yeast-human gene

392 homology to identify correlated differential gene expression associated with drug  
393 sensitivity in cancer cell lines (**Figs. 5-7**). This approach serves to generate hypotheses  
394 regarding whether differential expression of a particular gene is causal for increased  
395 drug sensitivity [52], and ultimately whether yeast phenomic models can improve the  
396 predictive value of cancer pharmacogenomics data in the context of precision oncology  
397 [53-58].

398

### 399 **Functions that respond to gemcitabine and cytarabine similarly**

#### 400 *Genetic modules that buffer cytotoxicity of both gemcitabine and cytarabine*

401 To characterize gemcitabine and cytarabine, which have similar molecular  
402 structures and mechanisms of action, yet different spectra of anti-tumor efficacy, we first  
403 surveyed for buffering genes shared in common. Examples of genes with deletion  
404 enhancing interactions for both drugs are displayed in clusters 2-0.2-0, 1-0-14, 2-0.2-2  
405 and 2-0.16-1 (**Fig. 3B**). GO enrichment was observed in these clusters for the *DNA*  
406 *integrity checkpoint*, *positive regulation of DNA replication*, and the Mre11, RecQ  
407 helicase-Topo III, CORVET, HOPS, GET, and Ubp3-Bre5 deubiquitination complexes  
408 (**Fig. 4, Table 1**). GTA identified many of the same functions and additionally revealed  
409 the terms *vesicle fusion with vacuole* and checkpoint clamp complex (**Table 2**). We  
410 mapped yeast gene-drug interactions to respective human homologs in PharmacoDB to  
411 find evidence for evolutionary conservation of gene-drug interaction (**Fig. 5C-D,**  
412 **Additional File 8, Files B-D**) and buffering mechanisms.

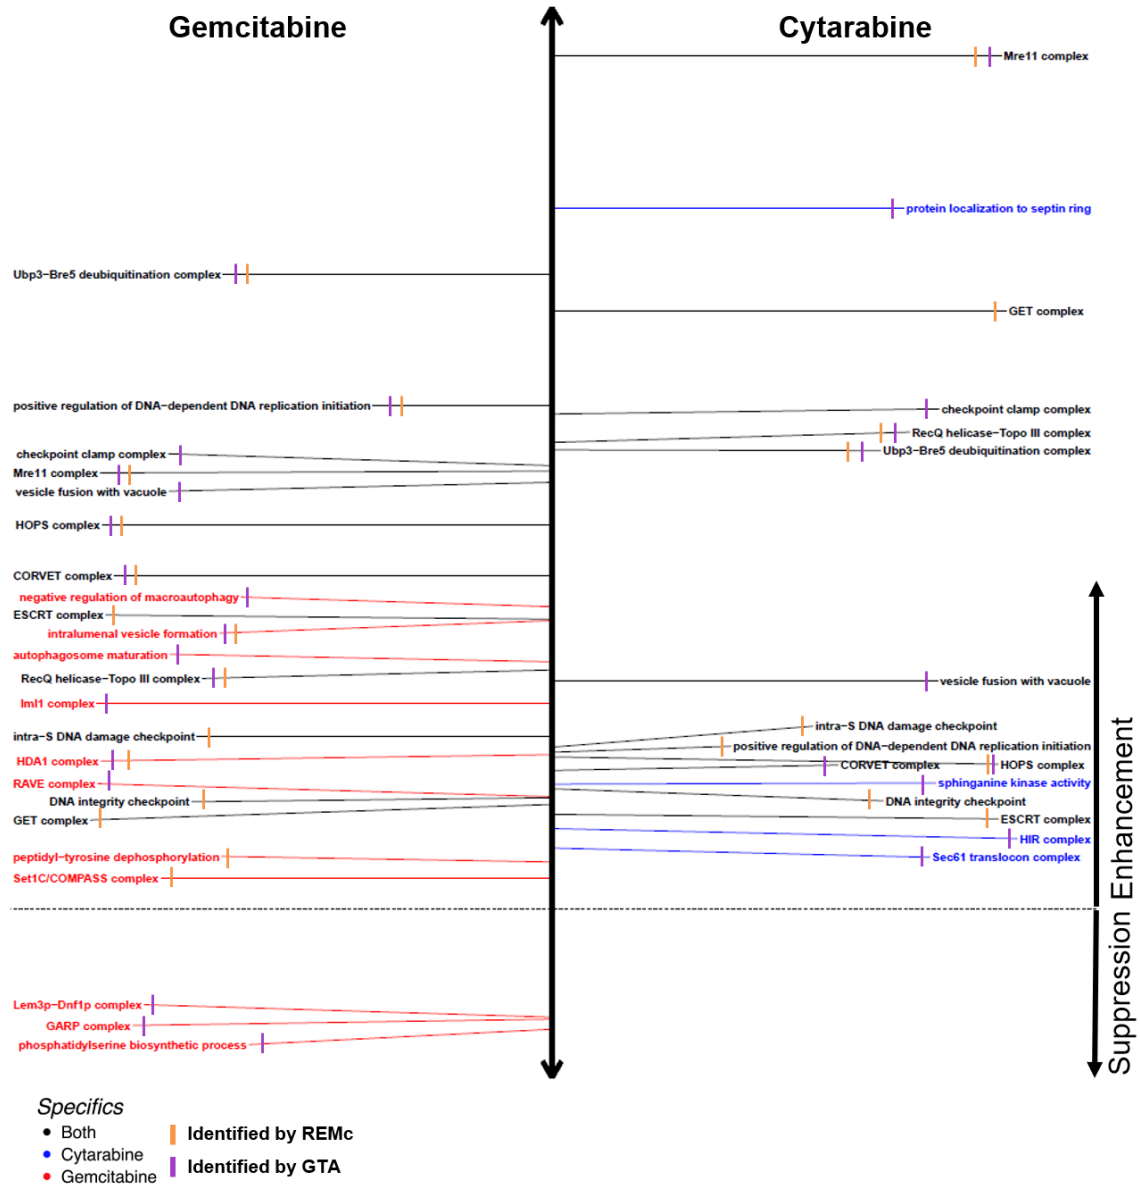

413

414

415

**Figure 4. GO annotations associated with deletion enhancement or suppression of**

416

**gemcitabine and/or cytarabine cytotoxicity.** Representative GO terms are listed,

417

which were identified by REMc/GTF (orange), GTA (purple), or both methods, for

418

enhancement (above dashed line) or suppression (below dashed line) of gemcitabine

419

(left, red), cytarabine (right, blue), or both media types (black). Term-specific heatmaps

420

were manually reviewed for inclusion. Distance above or below the horizontal dashed

421 line reflects the average interaction score for genes identified by REMc/GTF or the GTA

422 score (see methods). See **Additional Files 5 and 6** for all REMc/GTF, and GTA results.



423 *DNA integrity checkpoint and repair-related complexes*

424 As gemcitabine and cytarabine triphosphate analogs are incorporated into DNA,  
425 we anticipated shared interactions with genes functioning in DNA metabolism and repair.  
426 Overlap was observed, however there were differential effects between genes assigned  
427 to the same gene ontology terms, such that GO TermFinder enrichment in REMc  
428 clusters was less than might have been expected. For example, deletion enhancing  
429 gene-drug interaction for the GO term, *DNA integrity checkpoint*, was enriched in cluster  
430 1-0-14, which displayed deletion enhancement for both gemcitabine and cytarabine  
431 (**Table 1, Figs. 3 and Fig. 5A**). However, its child term, *intra-S DNA damage*  
432 *checkpoint*, was not GO-enriched because of differential clustering among drug-gene  
433 interactions associated with the term (**Additional File 5, File C**). Similarly, *intra-S DNA*  
434 *damage checkpoint* was not identified by GTA due to variation in interaction between  
435 genes assigned to the term, highlighting the utility in displaying the phenomic data for  
436 each GO term for manual review (**Fig. 5A**).

437 Enriched complexes functionally related to the DNA integrity checkpoint function  
438 included the RecQ helicase-Topo III, the checkpoint clamp, and the Mre11 complexes  
439 (**Fig. 5B**). Rmi1, Top3, and Sgs1 form the RecQ helicase Topo III complex, which is  
440 involved in Rad53 checkpoint activation and maintenance of genome integrity [59], and  
441 together with replication protein A functions in DNA decatenation and disentangling of  
442 chromosomes [60]. *RMI1* and *SGS1* deletion enhancement clustered together in 1-0-14,  
443 while *TOP3* had a similar, but slightly weaker interaction pattern in cluster 1-0-16  
444 (**Additional File 5, File B**). The human homolog of *SGS1*, *RECQL5*, was UES for  
445 cytarabine in lung cancer cells (**Fig. 5C**; see **1-0-14** in 5C, all cluster heatmaps available  
446 in **Additional File 5, File B**). *RECQL5* preserves genome stability during

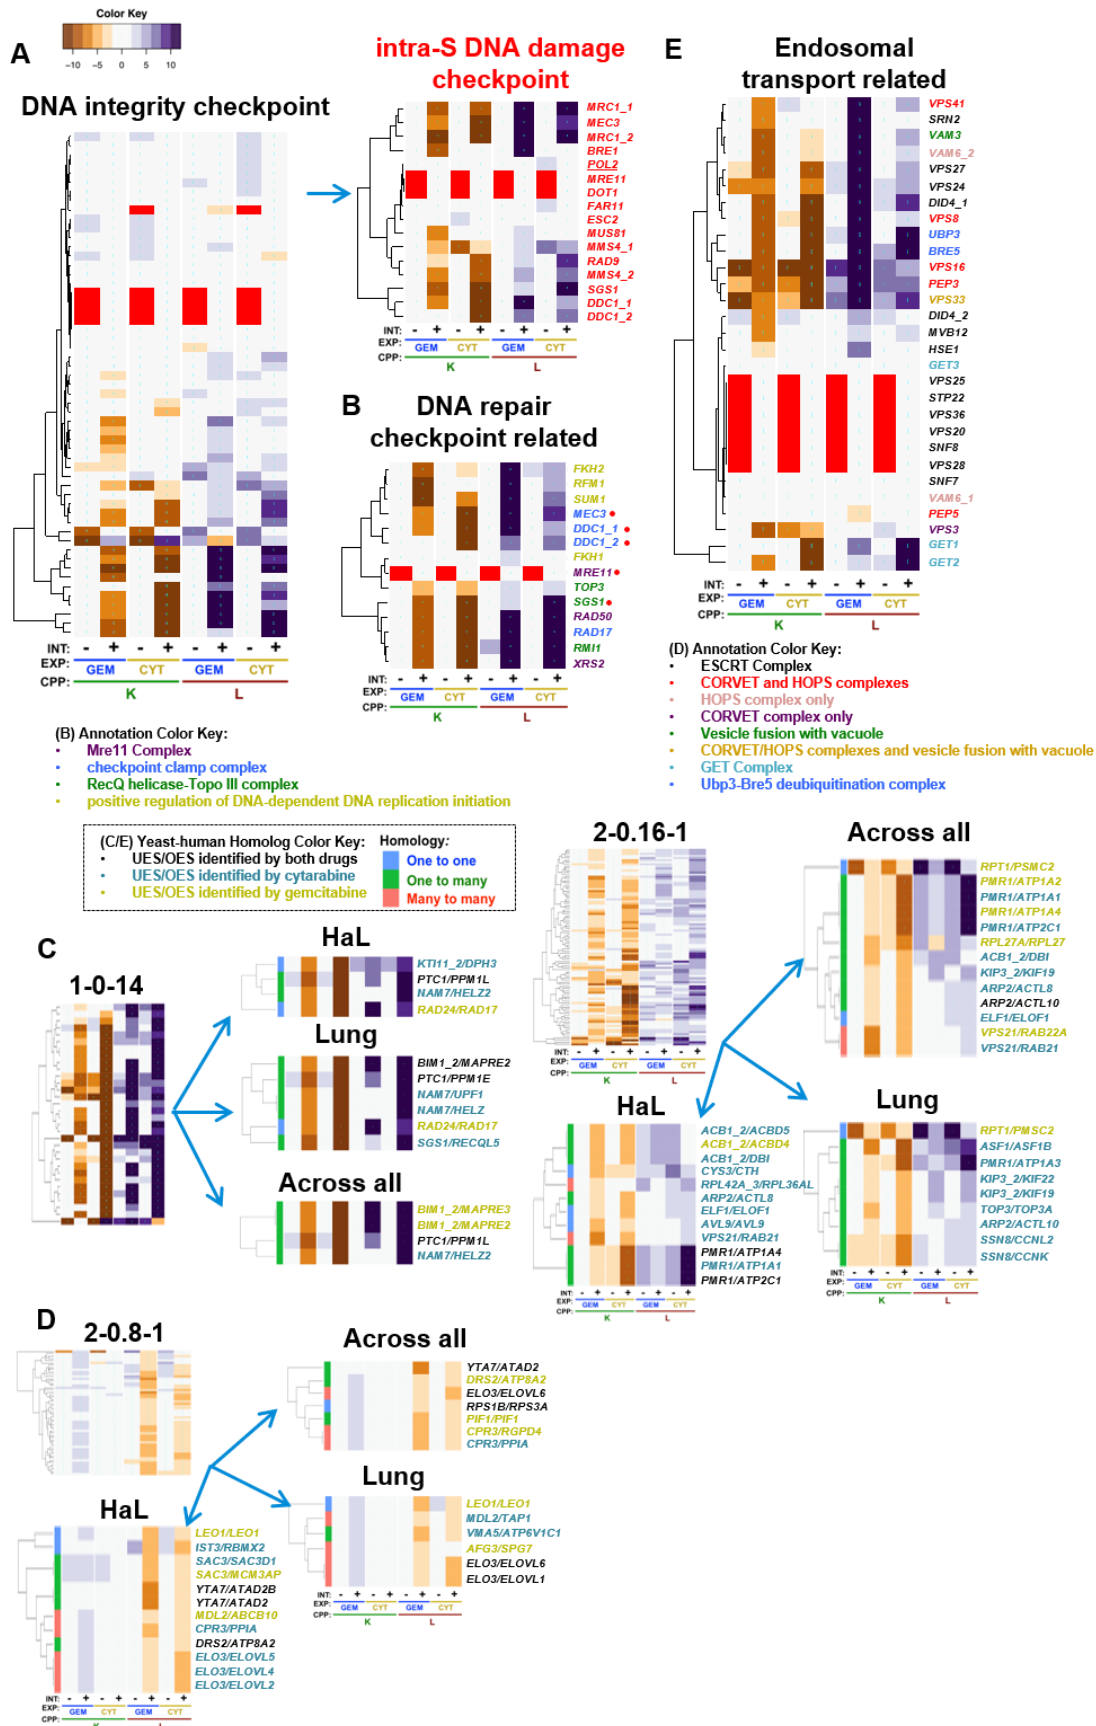

448 **Figure 5. Drug-gene interaction common to gemcitabine and cytarabine.** Genes  
449 that similarly influence the cytotoxicity of both gemcitabine and cytarabine suggest  
450 common pathways that buffer or promote toxicity, as illustrated by: (A) GO term-specific  
451 heatmaps for *DNA integrity checkpoint* and its child term *intra-S DNA damage*  
452 *checkpoint*, which buffer gemcitabine and cytarabine, along with (B) genes comprising  
453 other DNA checkpoint/repair related GO terms, such as *positive regulation of DNA-*  
454 *dependent DNA replication initiation*, and the Mre11, checkpoint clamp, and RecQ  
455 helicase-Topo III complexes; (C, D) REMc clusters filtered for PharmacoDB results for  
456 yeast-human homologs that exhibited (C) deletion enhancement and UES or (D)  
457 deletion suppression and OES; and (E) deletion enhancing endosomal-transport-related  
458 GO terms, including *vesicle fusion with vacuole*, and the CORVET/HOPS, ESCRT, GET,  
459 and Ubp3-Bre5 deubiquitination complexes. Gene labels are color-coordinated with  
460 legends in panels B and E, and as described in **Fig. 3H** for panels C and D.

461  
462

**Table 3. Yeast-human homologs predicted to similarly buffer or promote both gemcitabine and cytarabine toxicity.**

| yGene   | hGene  | H | Drug | Cluster  | Tissue | Gem K | Cyt K | Gem L | Cyt L | Ref     | Description (Human)                                  |
|---------|--------|---|------|----------|--------|-------|-------|-------|-------|---------|------------------------------------------------------|
| NAM7    | HELZ   | 2 | Cyt  | 1-0-14   | L      | -6.5  | -16.7 | 1.1   | 13.6  | [61-64] | helicase with zinc finger                            |
| NAM7    | HELZ2  | 2 | Cyt  | 1-0-14   | A, H   | -6.5  | -16.7 | 1.1   | 13.6  |         | helicase with zinc finger 2                          |
| NAM7    | UPF1   | 2 | Cyt  | 1-0-14   | L      | -6.5  | -16.7 | 1.1   | 13.6  | [65-67] | UPF1, RNA helicase and ATPase                        |
| PTC1    | PPM1E  | 2 | Both | 1-0-14   | L      | -8.8  | -12.7 | 7.9   | 15.7  | [68]    | protein phosphatase, Mg2+/Mn2+ dependent 1E          |
| PTC1    | PPM1L  | 2 | Both | 1-0-14   | A, H   | -8.8  | -12.7 | 7.9   | 15.7  | [69]    | protein phosphatase, Mg2+/Mn2+ dependent 1L          |
| RAD24   | RAD17  | 1 | Gem  | 1-0-14   | H, L   | -7.4  | -27.6 | 14.2  | 8.3   | [70-74] | RAD17 checkpoint clamp loader component              |
| SGS1    | RECQL5 | 2 | Cyt  | 1-0-14   | L      | -8.4  | -33.4 | 3.4   | 19.3  | [75,76] | RecQ like helicase 5                                 |
| KTI11_2 | DPH3   | 1 | Cyt  | 1-0-14   | H      | -7.7  | -10.3 | 6.5   | 9.1   | [77-79] | diphthamide biosynthesis 3                           |
| BIM1_2  | MAPRE2 | 2 | Gem  | 1-0-14   | A      | -7.7  | -15.4 | 16.0  | 20.0  | [80]    | microtubule associated protein RP/EB family member 2 |
| BIM1_2  | MAPRE2 | 2 | Both | 1-0-14   | L      | -7.7  | -15.4 | 16.0  | 20.0  | [80]    | microtubule associated protein RP/EB family member 2 |
| BIM1_2  | MAPRE3 | 2 | Gem  | 1-0-14   | A      | -7.7  | -15.4 | 16.0  | 20.0  | [81]    | microtubule associated protein RP/EB family member 3 |
| ASF1    | ASF1B  | 2 | Cyt  | 2-0.16-1 | L      | -6.1  | -9.5  | 4.1   | 8.3   | [82]    | anti-silencing function 1B histone chaperone         |
| AVL9    | AVL9   | 1 | Cyt  | 2-0.16-1 | H      | -4.3  | -2.5  | 0.2   | 2.9   | [83-85] | AVL9 cell migration associated                       |
| PMR1    | ATP1A1 | 2 | Cyt  | 2-0.16-1 | A, H   | -3.8  | -9.8  | 3.6   | 10.1  | [86]    | ATPase Na+/K+ transporting subunit alpha 1           |
| PMR1    | ATP1A2 | 2 | Gem  | 2-0.16-1 | A      | -3.8  | -9.8  | 3.6   | 10.1  | [87]    | ATPase Na+/K+ transporting subunit alpha 2           |
| PMR1    | ATP1A3 | 2 | Cyt  | 2-0.16-1 | L      | -3.8  | -9.8  | 3.6   | 10.1  |         | ATPase Na+/K+ transporting subunit alpha 3           |
| PMR1    | ATP1A4 | 2 | Gem  | 2-0.16-1 | A      | -3.8  | -9.8  | 3.6   | 10.1  |         | ATPase Na+/K+ transporting subunit alpha 4           |
| PMR1    | ATP1A4 | 2 | Both | 2-0.16-1 | H      | -3.8  | -9.8  | 3.6   | 10.1  |         | ATPase Na+/K+ transporting subunit alpha 4           |
| PMR1    | ATP2C1 | 2 | Cyt  | 2-0.16-1 | A      | -3.8  | -9.8  | 3.6   | 10.1  | [88,89] | ATPase secretory pathway Ca2+ transporting 1         |

| yGene  | hGene  | H | Drug | Cluster  | Tissue | Gem K | Cyt K | Gem L | Cyt L | Ref       | Description (Human)                                               |
|--------|--------|---|------|----------|--------|-------|-------|-------|-------|-----------|-------------------------------------------------------------------|
| PMR1   | ATP2C1 | 2 | Both | 2-0.16-1 | H      | -3.8  | -9.8  | 3.6   | 10.1  | [88,89]   | ATPase secretory pathway Ca2+ transporting 1                      |
| TOP3   | TOP3A  | 2 | Cyt  | 2-0.16-1 | L      | -5.2  | -4.0  | 3.3   | 3.4   | [90-92]   | DNA topoisomerase III alpha                                       |
| VPS21  | RAB21  | 3 | Cyt  | 2-0.16-1 | A, H   | -7.2  | -4.1  | -0.4  | 2.4   | [93,94]   | RAB21, member RAS oncogene family                                 |
| VPS21  | RAB22A | 3 | Gem  | 2-0.16-1 | A      | -7.2  | -4.1  | -0.4  | 2.4   | [95-97]   | RAB22A, member RAS oncogene family                                |
| ACB1_2 | ACBD4  | 2 | Gem  | 2-0.16-1 | H      | -5.4  | -4.8  | 4.5   | 0.6   | [98,99]   | acyl-CoA binding domain containing 4                              |
| ACB1_2 | ACBD5  | 2 | Cyt  | 2-0.16-1 | H      | -5.4  | -4.8  | 4.5   | 0.6   | [100]     | acyl-CoA binding domain containing 5                              |
| ACB1_2 | DBI    | 2 | Cyt  | 2-0.16-1 | A, H   | -5.4  | -4.8  | 4.5   | 0.6   | [101-103] | diazepam binding inhibitor, acyl-CoA binding protein              |
| CPR3   | PPIA   | 3 | Cyt  | 2-0.8-1  | A, H   | 2.1   | 1.6   | -4.1  | -2.8  | [104-106] | peptidylprolyl isomerase A                                        |
| CPR3   | RGPD4  | 3 | Gem  | 2-0.8-1  | A      | 2.1   | 1.6   | -4.1  | -2.8  |           | RANBP2-like and GRIP domain containing 4                          |
| ELO3   | ELOVL1 | 3 | Both | 2-0.8-1  | L      | 2.2   | 1.3   | -3.4  | -4.0  | [107,108] | ELOVL fatty acid elongase 1                                       |
| ELO3   | ELOVL2 | 3 | Cyt  | 2-0.8-1  | H      | 2.2   | 1.3   | -3.4  | -4.0  | [109]     | ELOVL fatty acid elongase 2                                       |
| ELO3   | ELOVL4 | 3 | Cyt  | 2-0.8-1  | H      | 2.2   | 1.3   | -3.4  | -4.0  |           | ELOVL fatty acid elongase 4                                       |
| ELO3   | ELOVL5 | 3 | Cyt  | 2-0.8-1  | H      | 2.2   | 1.3   | -3.4  | -4.0  |           | ELOVL fatty acid elongase 5                                       |
| ELO3   | ELOVL6 | 3 | Both | 2-0.8-1  | A, L   | 2.2   | 1.3   | -3.4  | -4.0  | [110,111] | ELOVL fatty acid elongase 6                                       |
| MDL2   | ABCB10 | 3 | Gem  | 2-0.8-1  | H      | 2.5   | 1.5   | -3.0  | -3.0  | [112]     | ATP binding cassette subfamily B member 10                        |
| MDL2   | TAP1   | 3 | Cyt  | 2-0.8-1  | L      | 2.5   | 1.5   | -3.0  | -3.0  |           | transporter 1, ATP binding cassette subfamily B member            |
| PIF1   | PIF1   | 2 | Gem  | 2-0.8-1  | A      | 2.2   | 1.5   | -4.5  | -3.4  | [113]     | PIF1 5'-to-3' DNA helicase                                        |
| RPS1B  | RPS3A  | 1 | Both | 2-0.8-1  | A      | 2.3   | 0.9   | -3.9  | -2.3  | [114,115] | ribosomal protein S3A                                             |
| SAC3   | MCM3AP | 2 | Gem  | 2-0.8-1  | H      | 2.2   | 1.5   | -5.2  | -3.8  | [116]     | minichromosome maintenance complex component 3 associated protein |
| SAC3   | SAC3D1 | 2 | Cyt  | 2-0.8-1  | H      | 2.2   | 1.5   | -5.2  | -3.8  | [117,118] | SAC3 domain containing 1                                          |
| YTA7   | ATAD2  | 2 | Both | 2-0.8-1  | A, H   | 1.8   | 1.0   | -6.0  | -3.6  | [119-125] | ATPase family, AAA domain containing 2                            |

| yGene | hGene  | H | Drug | Cluster | Tissue | Gem K | Cyt K | Gem L | Cyt L | Ref | Description (Human)                     |
|-------|--------|---|------|---------|--------|-------|-------|-------|-------|-----|-----------------------------------------|
| YTA7  | ATAD2B | 2 | Both | 2-0.8-1 | H      | 1.8   | 1.0   | -6.0  | -3.6  |     | ATPase family, AAA domain containing 2B |

463

464 Genes selected for discussion in the results were included in the table. The homology types (H) are one to one (1), one to many (2),  
465 and many to many (3). Tissue types are across all (A), lung (L), and hematopoietic. Drugs (Gem, Cyt, or Both) for which the genes  
466 were UES or OES in the GDSC database are indicated. The REMc clusters 1-0-14 and 2-0.16-1 are deletion enhancing and 2-0.8-1  
467 is deletion suppressing (see **Fig. 5C-D**). The PharmacoDB reference tissue, references cited (Ref), and gene descriptions are given.  
468 **Additional File 8** contains other data of this type.

469 transcription elongation, and deletion of *RECQL5* increases cancer susceptibility [75,76].  
470 Human *TOP3A* was also UES for cytarabine in lung tissue (**Fig 5C; 2-0.16-1**). *TOP3A* is  
471 underexpressed in ovarian cancer, and mutations in *TOP3A* are associated with  
472 increased risk for acute myeloid leukemia, myelodysplastic syndromes, suggesting  
473 potential cancer vulnerabilities if somatic, but can also occur in the germline, which  
474 would lead to enhanced host toxicity [90-92].

475         The checkpoint clamp in yeast is comprised of Rad17/hRad1, Ddc1, and Mec3,  
476 which function downstream of Rad24/hRad17 in the DNA damage checkpoint pathway  
477 [70-72] to recruit yDpb11/hTopB1 to stalled replication forks and activate the  
478 yMec1/hATR protein kinase activity, initiating the DNA damage response [73]. The  
479 human homolog of yeast *RAD24*, *RAD17*, was UES for gemcitabine in both lung and  
480 hematopoietic & lymphoid tissue (**Fig. 5C; 1-0-14**), representing a synthetic lethal  
481 relationship of potential therapeutic relevance. Consistent with this finding in yeast,  
482 depletion of *hRAD17* can sensitize pancreatic cancer cells to gemcitabine [74].

483         Mre11, Xrs2, and Rad50 constitute the Mre11 complex, which participates in the  
484 formation and processing of double-strand DNA breaks involved in recombination and  
485 repair [126], and clustered together in 1-0-14 (**Figs. 5B-C**). Deficiency in the Mre1  
486 complex is known to sensitize human cells to nucleoside analog toxicity [127], as also  
487 seen in cancer cell lines deficient for other checkpoint-signaling genes, such as Rad9,  
488 Chk1, or ATR, [128]. Single nucleotide polymorphisms in DNA damage response (*ATM*  
489 and *CHEK1*) have been associated with overall survival in pancreatic cancer patients  
490 treated with gemcitabine and radiation therapy [129]. Taken together, the results highlight  
491 evolutionarily conserved genes that function in DNA replication and recombination-  
492 based repair and are required to buffer the cytotoxic effects of both cytarabine and  
493 gemcitabine.

494

495 *Positive regulation of DNA-dependent DNA replication initiation*

496 The term, *positive regulation of DNA-dependent DNA replication initiation*, was  
497 identified by REMc/GTF and GTA for buffering interactions with both drugs, though  
498 stronger for gemcitabine (**Tables 1 and 2**). Genes representing this term were *FKH2*,  
499 *RFM1*, and *SUM1* (**Fig. 5B**). The origin binding protein, Sum1, is required for efficient  
500 replication initiation [130] and forms a complex with Rfm1 and the histone deacetylase,  
501 Hst1, which is recruited to replication origins to deacetylate H4K5 for initiation [131].  
502 *HST1* was also a strong deletion enhancer but was observed only for the L parameter  
503 and clustered in 2-0.2-2. The forkhead box proteins, Fkh1 and Fkh2, contribute to proper  
504 replication origin timing and long range clustering of origins in G1 phase [132], and  
505 appear to buffer the cytotoxicity of gemcitabine more so than cytarabine, with *FKH2*  
506 deletion showing a stronger effect than its paralog (**Fig. 5B**). Multiple human forkhead  
507 box protein homologs (*yFKH2/hFOXJ1/FOXG1/FOXJ3/FOXH1*) (**Fig. 6D**) were  
508 observed as UES in PharmacnoDB, of which *FOXJ1* underexpression is a marker of poor  
509 prognosis in gastric cancer [133], reduced expression of *FOXG1* is correlated with worse  
510 prognosis in breast cancer [134], *FOXJ3* is inhibited by miR-517a and associated with  
511 lung and colorectal cancer cell proliferation and invasion [135,136], and *FOXH1* is  
512 overexpressed in breast cancer, and *FOXH1* inhibition reduces proliferation in breast  
513 cancer cell lines [137]. Although not UES in PharmacnoDB, inhibition of the *HST1*  
514 homolog, *SIRT1*, by Tenovin-6 inhibits the growth of acute lymphoblastic leukemia cells  
515 and enhances cytarabine cytotoxicity [138], enhances gemcitabine efficacy in pancreatic  
516 cancer cell lines, and improves survival in a pancreatic cancer mouse model [139]. Thus,  
517 loss of this gene module that positively regulates DNA replication initiation appears to be  
518 robustly involved in oncogenesis and is also synthetic lethal with gemcitabine and  
519 cytarabine.

520



521 *Endosomal transport and related processes*

522 GO annotated processes, enriched by REMc/GTF and GTA and having deletion  
523 enhancement profiles, related to endosome transport included *vesicle fusion with*  
524 *vacuole* (*VAM3* and *VPS33*), the CORVET/HOPS (*VPS41*, *VPS8*, *VPS16*, *PEP3*,  
525 *VPS33*, *VAM6*, and *VPS3*), ESCRT (*VPS27*, *VPS24*, *DID4*, *MVB12*; *HSE1* and *SRN2*  
526 were gemcitabine specific), GET complex (*GET1*, *GET2*; 2-0.14-0), and Ubp3-Bre5  
527 deubiquitination (*UBP3* and *BRE5*) complexes (**Tables 1-2, Fig. 5E**). The CORVET and  
528 HOPS tethering complexes function in protein and lipid transport between endosomes  
529 and lysosomes/vacuoles, are required for vacuolar fusion, recognize SNARE complexes,  
530 help determine endomembrane identity, and interact with the ESCRT complex [140,141].  
531 The ESCRT complex recognizes ubiquitinated endosomal proteins to mediate  
532 degradation through the multivesicular body pathway [142,143]. The Ubp3-Bre5  
533 deubiquitination complex maintains Sec23, a subunit of COPII vesicles required for  
534 transport between the ER and Golgi, by cleaving its ubiquitinated form [144]. The GET  
535 complex (*GET1-3*) mediates insertion of tail-anchored proteins into the ER membrane, a  
536 critical process within the secretory pathway for vesicular trafficking [145-147]. Thus,  
537 these complexes, which function in processes related to endosomal transport, appear to  
538 be critical for buffering the toxicity of nucleoside analogs.

539 Several deletion enhancing, endosomal genes had human homologs associated  
540 with UES in cancer cell lines and/or reported roles in cancer biology (**Figs. 5E, 6D**),  
541 including: (1) *VPS41/VPS41*, in which a single nucleotide polymorphism is associated  
542 with familial melanoma [148]; (2) *VPS27/WDFY1*, which is regulated by *NPR2* to  
543 maintain the metastatic phenotype of cancer cells [149,150]; (3) human homologs of  
544 yeast *HSE1*, *TOM1* and *TOM1L2*, *TOM1L2* hypomorphic mice having increased tumor  
545 incidence associated with alterations in endosomal trafficking [151]; (4) *VPS8/VPS8* and  
546 *VAM6/VPS39*, which are predicted to be homologous members of the CORVET complex

547 [152]; and (5) *VPS21/RAB21/RAB22A*, where *RAB21* promotes carcinoma-associated  
548 fibroblast invasion and knockdown inhibits glioma cell proliferation [93,94], and *RAB22A*  
549 promotes oncogenesis in lung, breast, and ovarian cancer [95-97]. Thus, it seems tumors  
550 arising in the context of deficiencies in certain endosomal trafficking genes could be  
551 vulnerable to gemcitabine and/or cytarabine.

552

553 '*Non-GO-enriched*' homolog pairs with corresponding UES and deletion enhancement

554 We next explored yeast-human homologs exhibiting yeast deletion enhancement  
555 and underexpression sensitivity in cancer, systematically and regardless of whether their  
556 functions were enriched within Gene Ontology (**Table 3, Fig. 5C**). 'Non-enriched'  
557 interaction can be explained by a small total number of genes performing the function,  
558 only select genes annotated to a term impacting the phenotype, by genes contributing to  
559 a function without yet being annotated to it, by novel functions, and other possibilities.

560 With regard to the above, human homologs of the yeast type 2C protein  
561 phosphatase, *PTC1*, included *PPM1L* and *PPM1E* (**Fig. 5C; 1-0-14**). *PPM1L* has  
562 reduced expression in familial adenomatous polyposis [69], while *PPM1E* upregulation  
563 has been associated with cell proliferation in gastric cancer [68]. Such differential  
564 interactions of paralogs could result from tissue specific expression and functional  
565 differentiation of regulatory proteins. Previously, we reported *ptc1-Δ0* to buffer  
566 transcriptional repression of *RNR1* [34], which is upregulated as part of the DNA damage  
567 response to increase dNTP pools [153].

568 The microtubule binding proteins, *yBIM1/hMAPRE2/hMAPRE3*, were deletion  
569 enhancing in yeast and UES in cancer for gemcitabine (**Fig. 5C; 1-0-14**), of which  
570 frameshift mutations were reported in *MAPRE3* for gastric and colorectal cancers [81],  
571 however, *MAPRE2* is upregulated in invasive pancreatic cancer cells [80], demonstrating  
572 that the yeast phenomic model could help distinguish causal influence in cases of

573 paralogous gene expression having what appear to be opposing effects on phenotypic  
574 response of cancer cells to cytotoxic chemotherapy.

575 *NAM7* is a yeast RNA helicase that was deletion enhancing for both drugs,  
576 though slightly stronger for cytarabine, while its human homologs *HELZ*, *HELZ2*, and  
577 *UPF1*, were UES only with cytarabine (**Fig. 5C; 1-0-14**). *HELZ* has differential influence  
578 in cancer, acting as a tumor suppressor or oncogene [61-64]. *UPF1* downregulation is  
579 associated with poor prognosis in gastric cancer and hepatocellular carcinoma, and  
580 mutations often occur in pancreatic adenosquamous carcinoma [65-67]. Thus, it is  
581 possible cytarabine could have efficacy for patients with mutational loss of function in  
582 members of this helicase family.

583 *ASF1/ASF1B* (**Fig. 5C; 2-0.16-1**) functions in nucleosome assembly as an anti-  
584 silencing factor, and is one of the most overexpressed histone chaperones in cancer  
585 [82]. The yeast phenomic data suggest that anti-cancer approaches that target *ASF1* as  
586 a driver [154] could be augmented by combination with gemcitabine or cytarabine.

587 *AVL9/AVL9* (**Fig. 5C; 2-0.16-1**) functions in exocytic transport from the Golgi [83].  
588 *AVL9* knockdown resulted in abnormal mitoses associated with defective protein  
589 trafficking, and increased cell migration with development of cysts [84], but also reduced  
590 cell proliferation and migration in other studies [85]. Regardless, the yeast phenomic  
591 model together with pharmacogenomics data would predict that functional loss of *AVL9*  
592 renders cells vulnerable to cytarabine.

593 *PMR1* is a P-type ATPase that transports  $Mn^{++}$  and  $Ca^{++}$  into the Golgi. Several  
594 of its human homologs *ATP1A1*, *ATP1A2*, *ATP1A3*, *ATP1A4*, *ATP2C1* were UES, either  
595 for gemcitabine or cytarabine, in the PharmacoDB analysis (**Fig. 5C; 2-0.16-1**). Reduced  
596 expression of *ATP1A1* can promote development of renal cell carcinoma [86], reduced  
597 expression of *ATP1A2* is associated with breast cancer [87], and mutations in *ATP2C1*  
598 impair the DNA damage response, and increase the incidence of squamous cell tumors

599 in mice [88,89]. Like with *FKH2* (described above), *PMR1* deletion enhancement points  
600 to multiple human homologs that are both implicated in the cancer literature to promote  
601 cancer when underexpressed, yet are also UES in the pharmacogenomics data,  
602 suggesting a potentially clinically useful synthetic lethal vulnerability.

603 *KT111/DPH3* (**Fig. 5C; 1-0-14**), is a multi-functional protein involved in the  
604 biosynthesis of diphthamide and tRNA modifications important for regulation of  
605 translation, development and stress response [77,78], and has promoter mutations  
606 associated with skin cancer [79]. It was observed to be UES only for cytarabine and in  
607 hematopoietic and lymphoid cancer (the context cytarabine is used clinically).

608 *ACB1* binds acyl-CoA esters and transports them to acyl-CoA-consuming  
609 processes, which is upregulated in response to DNA replication stress [155]. Human  
610 homologs of *ACB1* exhibiting UES (**Fig. 5C; 2-0.16-1**) included: (1) *DBI*, which is  
611 upregulated in hepatocellular carcinoma and lung cancer, and its expression is  
612 negatively associated with multidrug resistance in breast cancer [101-103]; (2) *ACBD4*,  
613 which promotes ER-peroxisome associations [98] and is upregulated by a histone  
614 deacetylase inhibitor, valproic acid, in a panel of cancer cell lines [99]; and (3) *ACBD5*,  
615 which also promotes ER-peroxisome associations, but its link to cancer is unclear [100].  
616 Thus, it appears this gene family may influence epigenetic processes that buffer the  
617 cytotoxic effects of gemcitabine and cytarabine.

618

#### 619 Deletion suppression of toxicity for both nucleosides

620 As opposed to deletion enhancing interactions, which represent functions that  
621 buffer the cytotoxic effects of the drugs, deletion suppression identifies genes that  
622 promote toxicity, thus predicting overexpression sensitivity (OES) in pharmacogenomics  
623 data that represent causal tumor vulnerabilities. REMc/GTF identified as deletion  
624 suppressing the GO terms *glutaminyI-tRNA(Gln) biosynthesis* (1-0-3), the nucleoplasmic

625 THO (2-0.8-1), RNA cap binding (1-0-3), and the NuA3b histone acetyltransferase  
626 complexes (1-0-7) (**Additional File 5, File C**), while GTA identified *mitochondrial*  
627 *translational elongation* and the *nuclear cap binding complex* (**Additional File 6, File A**).  
628 However, the respective term-specific heatmaps revealed weak effects and high shift for  
629 many of the genes (**Additional File 2, Fig. S3**), highlighting the utility of this phenomic  
630 visualization tool for prioritizing findings, and leading us to shift our focus to individual  
631 yeast-human homologs identified in gene deletion suppressing clusters that were OES in  
632 the pharmacogenomics analysis, as detailed below.

633 In cluster 2-0.8-1, yeast-human homologs with correlated gene deletion  
634 suppression and OES for both gemcitabine and cytarabine (**Fig. 5D; Table 3**) included:  
635 (1) *YTA7/ATAD2/ATAD2B*, which localizes to chromatin and regulates histone gene  
636 expression. *ATAD2* overexpression portends poor prognosis in gastric, colorectal,  
637 cervical, hepatocellular carcinoma, lung, and breast cancer, and thus overexpression  
638 sensitivity could represent the potential to target a driver gene [119-125]; (2) *PIF1/PIF1*, a  
639 DNA helicase, which is involved in telomere regulation and is required during oncogenic  
640 stress [113]; (3) *RPS1B/RPS3A*, which is a small subunit ribosomal protein that is  
641 overexpressed in hepatitis B associated hepatocellular carcinoma and non-small cell  
642 lung cancer [114,115]; (4) *LEO1/LEO1*, which associates with the RNA polymerase II and  
643 acts as an oncogene in acute myelogenous leukemia [156]; (5) *ELO3/ELOVL1/ELOVL2/*  
644 *ELOVL4/ELOVL6*, which constitutes a family of fatty acid elongases that function in  
645 sphingolipid biosynthesis, among which *ELOVL1* is overexpressed in breast and  
646 colorectal cancer tissue [107,108], *ELOVL2* is upregulated in hepatocellular carcinoma  
647 [109], and *ELOVL6* is overexpressed and associated with poor prognosis in liver and  
648 breast cancer [110,111]; (6) *MDL2/ABCB10*, which is a mitochondrial inner membrane  
649 ATP-binding cassette protein and is upregulated in breast cancer [112]; (7) *CPR3/PPIA*,  
650 which is a mitochondrial cyclophilin that is upregulated in lung cancer, esophageal, and

651 pancreatic cancer [104-106]; and (8) *SAC3/MCM3AP/SAC3D1*, which is a nuclear pore-  
652 associated protein functioning in transcription and mRNA export, with *MCM3AP* being  
653 upregulated in glioma cells [116], while *SAC3D1* is upregulated in cervical cancer and  
654 hepatocellular carcinoma [117,118]. Yeast gene deletion suppression together with  
655 overexpression sensitivity of human homologs in cancer reveals potential therapeutic  
656 vulnerabilities that can be further explored in both systems.

657

### 658 **Gemcitabine-specific gene interaction modules**

#### 659 *Gemcitabine-specific gene deletion enhancement*

660 Gemcitabine-specific deletion enhancement indicates genes for which loss of  
661 function increases vulnerability to gemcitabine to a greater extent than cytarabine.  
662 Therefore, these genes provide insight into cytotoxic mechanisms that are unique  
663 between the two deoxycytidine analogs. Representative clusters were GO-enriched for  
664 *intraluminal vesicle formation* (1-0-10), *peptidyl-tyrosine dephosphorylation* (1-0-0), and  
665 the Set1C/COMPASS and HDA1 complexes (**Fig. 3C, Fig. 6A-C, Table 1**). GTA  
666 identified *negative regulation of macroautophagy*, *protein urmylation*, and the RAVE,  
667 GATOR (Im1), and Elongator holoenzyme complexes (**Fig. 6A, Table 2**).  
668 Pharmacogenomics integration is highlighted for clusters 2-0.2-1, 1-0-10, and 1-0-0 (**Fig.**  
669 **6D**; see also, **Additional File 8**). Taken together, the results suggest that autophagy-  
670 related processes and perhaps others less well characterized by GO buffer cytotoxicity  
671 of gemcitabine to a greater extent than cytarabine.

672

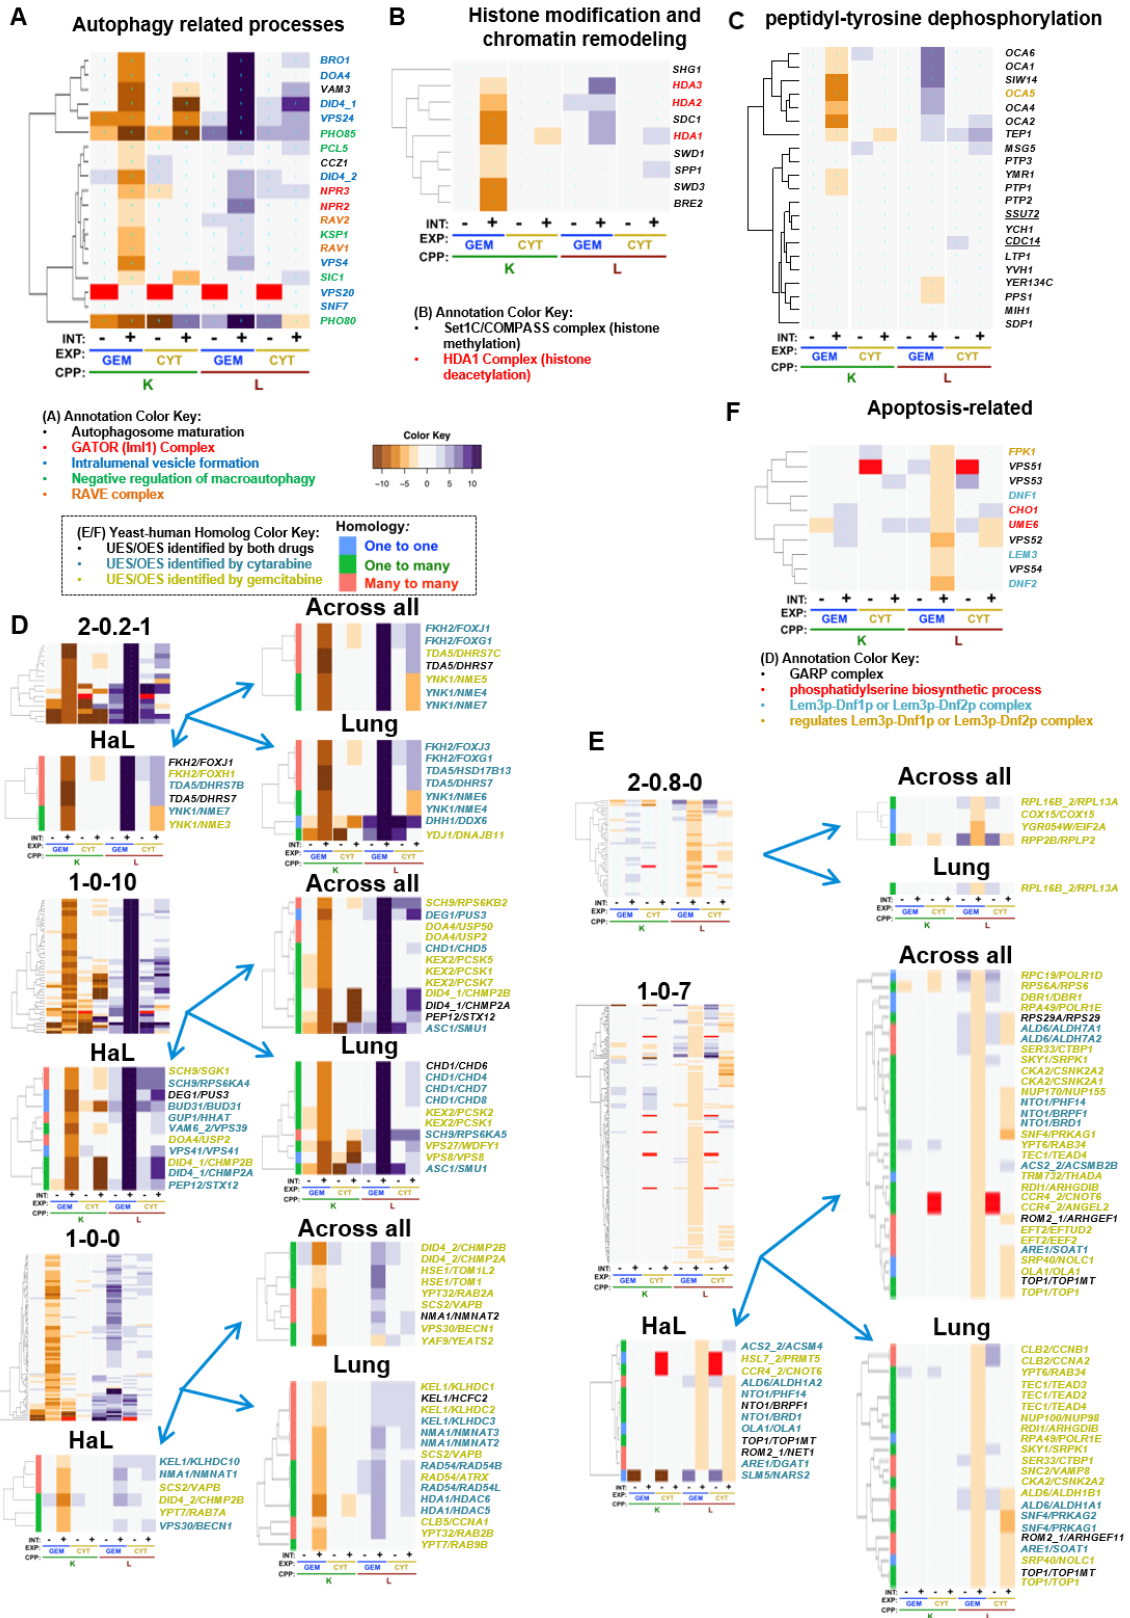

673  
674

675 **Figure 6. Gemcitabine-specific gene interaction.** (A-C) Cellular processes that buffer  
676 gemcitabine to a greater extent than cytarabine included: (A) Autophagy-related  
677 processes; (B) Histone modification and chromatin remodeling (particularly for K  
678 interaction); and (C) Peptidyl-tyrosine dephosphorylation, representing the genes *OCA*  
679 (1-6) (*OCA5* was manually added to the panel (see text); *OCA3/SIW14* are aliases). (D-  
680 E) Human genes that are predicted to (D) buffer gemcitabine toxicity if they are UES and  
681 deletion enhancing, and to (E) promote gemcitabine toxicity if they are found to be OES  
682 and deletion suppressing, when comparing homolog interactions across yeast phenomic  
683 and cancer pharmacogenomic analyses. (F) Apoptosis-related genes and complexes  
684 were observed to promote toxicity of gemcitabine more than toxicity of cytarabine. Gene  
685 labels are color-coordinated with legends in panels A, B, and F, and as described in **Fig.**  
686 **3H** for panels D and E.



687  
688

**Table 4. Yeast-human homologs predicted to buffer or promote gemcitabine to greater degree than cytarabine.**

| yGene  | hGene  | H | Drug | Cluster | Tissue  | Gem_K | Cyt_K | Gem_L | Cyt_L | Ref          | description_Human                                  |
|--------|--------|---|------|---------|---------|-------|-------|-------|-------|--------------|----------------------------------------------------|
| CLB5   | CCNA1  | 3 | Gem  | 1-0-0   | L       | -3.5  | 1.4   | 5.4   | -0.1  | [157]        | cyclin A1                                          |
| HDA1   | HDAC5  | 2 | Cyt  | 1-0-0   | L       | -6.4  | -2.6  | 5.0   | 2.2   | [158]        | histone deacetylase 5                              |
| HDA1   | HDAC6  | 2 | Cyt  | 1-0-0   | L       | -6.4  | -2.6  | 5.0   | 2.2   | [99,159-165] | histone deacetylase 6                              |
| HSE1   | TOM1   | 2 | Gem  | 1-0-0   | A       | -3.3  | 1.2   | 6.5   | 0.0   |              | target of myb1 membrane trafficking protein        |
| HSE1   | TOM1L2 | 2 | Gem  | 1-0-0   | A       | -3.3  | 1.2   | 6.5   | 0.0   | [151]        | target of myb1 like 2 membrane trafficking protein |
| NMA1   | NMNAT1 | 3 | Cyt  | 1-0-0   | H       | -4.6  | -2.0  | 4.2   | 2.5   | [166]        | nicotinamide nucleotide adenylyltransferase 1      |
| NMA1   | NMNAT2 | 3 | Both | 1-0-0   | A       | -4.6  | -2.0  | 4.2   | 2.5   | [167]        | nicotinamide nucleotide adenylyltransferase 2      |
| NMA1   | NMNAT2 | 3 | Cyt  | 1-0-0   | L       | -4.6  | -2.0  | 4.2   | 2.5   | [167]        | nicotinamide nucleotide adenylyltransferase 2      |
| NMA1   | NMNAT3 | 3 | Cyt  | 1-0-0   | L       | -4.6  | -2.0  | 4.2   | 2.5   |              | nicotinamide nucleotide adenylyltransferase 3      |
| RAD54  | ATRX   | 2 | Gem  | 1-0-0   | L       | -4.9  | -0.9  | 4.5   | 3.9   | [168]        | ATRX, chromatin remodeler                          |
| RAD54  | RAD54B | 2 | Cyt  | 1-0-0   | L       | -4.9  | -0.9  | 4.5   | 3.9   |              | RAD54 homolog B                                    |
| RAD54  | RAD54L | 2 | Cyt  | 1-0-0   | L       | -4.9  | -0.9  | 4.5   | 3.9   |              | RAD54 like                                         |
| SCS2   | VAPB   | 3 | Gem  | 1-0-0   | A, H, L | -4.3  | -0.2  | 3.8   | 1.4   | [100,169]    | VAMP associated protein B and C                    |
| VPS30  | BECN1  | 2 | Gem  | 1-0-0   | A       | -5.9  | -2.0  | 2.4   | 2.6   | [170]        | beclin 1                                           |
| VPS30  | BECN1  | 2 | Cyt  | 1-0-0   | H       | -5.9  | -2.0  | 2.4   | 2.6   | [170]        | beclin 1                                           |
| DID4_2 | CHMP2A | 2 | Gem  | 1-0-0   | A       | -6.1  | -1.2  | 5.2   | 1.8   | [171]        | charged multivesicular body protein 2A             |
| DID4_2 | CHMP2B | 2 | Gem  | 1-0-0   | A, H    | -6.1  | -1.2  | 5.2   | 1.8   | [172,173]    | charged multivesicular body protein 2B             |
| YPT32  | RAB2A  | 3 | Gem  | 1-0-0   | A       | -4.4  | 0.3   | 5.0   | -1.8  | [174]        | RAB2A, member RAS oncogene family                  |
| YPT32  | RAB2B  | 3 | Gem  | 1-0-0   | L       | -4.4  | 0.3   | 5.0   | -1.8  | [175]        | RAB2B, member RAS oncogene family                  |

| yGene  | hGene   | H | Drug | Cluster | Tissue | Gem_K | Cyt_K | Gem_L | Cyt_L | Ref       | yGene                                         |
|--------|---------|---|------|---------|--------|-------|-------|-------|-------|-----------|-----------------------------------------------|
| KEX2   | PCSK1   | 2 | Gem  | 1-0-10  | A, L   | -7.8  | -0.3  | 15.4  | -0.9  | [176]     | proprotein convertase subtilisin/kexin type 1 |
| KEX2   | PCSK2   | 2 | Gem  | 1-0-10  | L      | -7.8  | -0.3  | 15.4  | -0.9  | [177]     | proprotein convertase subtilisin/kexin type 2 |
| KEX2   | PCSK5   | 2 | Gem  | 1-0-10  | A      | -7.8  | -0.3  | 15.4  | -0.9  | [177,178] | proprotein convertase subtilisin/kexin type 5 |
| KEX2   | PCSK7   | 2 | Gem  | 1-0-10  | A      | -7.8  | -0.3  | 15.4  | -0.9  | [177,179] | proprotein convertase subtilisin/kexin type 7 |
| PEP12  | STX12   | 2 | Both | 1-0-10  | A      | -8.0  | -16.1 | 13.6  | 5.3   | [180,181] | syntaxin 12                                   |
| PEP12  | STX12   | 2 | Cyt  | 1-0-10  | H      | -8.0  | -16.1 | 13.6  | 5.3   | [180,181] | syntaxin 12                                   |
| VPS27  | WDFY1   | 2 | Gem  | 1-0-10  | L      | -8.1  | -9.1  | 14.3  | 5.2   | [149,150] | WD repeat and FYVE domain containing 1        |
| VPS41  | VPS41   | 1 | Cyt  | 1-0-10  | H      | -6.5  | -0.9  | 14.0  | 4.0   | [148]     | VPS41, HOPS complex subunit                   |
| VPS8   | VPS8    | 1 | Gem  | 1-0-10  | L      | -8.5  | -12.3 | 14.4  | 3.5   | [152]     | VPS8, CORVET complex subunit                  |
| VAM6_2 | VPS39   | 2 | Cyt  | 1-0-10  | H      | -8.0  | -2.8  | 13.9  | 4.0   | [152]     | VPS39, HOPS complex subunit                   |
| DID4_1 | CHMP2A  | 2 | Both | 1-0-10  | A      | -8.0  | -12.3 | 14.5  | 8.2   | [171]     | charged multivesicular body protein 2A        |
| DID4_1 | CHMP2A  | 2 | Cyt  | 1-0-10  | H      | -8.0  | -12.3 | 14.5  | 8.2   | [171]     | charged multivesicular body protein 2A        |
| DID4_1 | CHMP2B  | 2 | Gem  | 1-0-10  | A, H   | -8.0  | -12.3 | 14.5  | 8.2   | [172,173] | charged multivesicular body protein 2B        |
| FKH2   | FOXG1   | 3 | Cyt  | 2-0.2-1 | A, L   | -9.7  | -2.1  | 19.7  | 5.1   | [134]     | forkhead box G1                               |
| FKH2   | FOXH1   | 3 | Gem  | 2-0.2-1 | H      | -9.7  | -2.1  | 19.7  | 5.1   | [137]     | forkhead box H1                               |
| FKH2   | FOXJ1   | 3 | Cyt  | 2-0.2-1 | A, H   | -9.7  | -2.1  | 19.7  | 5.1   | [133]     | forkhead box J1                               |
| FKH2   | FOXJ3   | 3 | Cyt  | 2-0.2-1 | L      | -9.7  | -2.1  | 19.7  | 5.1   | [135,136] | forkhead box J3                               |
| YNK1   | NME3    | 2 | Gem  | 2-0.2-1 | H      | -9.3  | 1.0   | 20.0  | -4.0  |           | NME/NM23 nucleoside diphosphate kinase 3      |
| YNK1   | NME4    | 2 | Cyt  | 2-0.2-1 | A, L   | -9.3  | 1.0   | 20.0  | -4.0  |           | NME/NM23 nucleoside diphosphate kinase 4      |
| YNK1   | NME5    | 2 | Gem  | 2-0.2-1 | A      | -9.3  | 1.0   | 20.0  | -4.0  | [182]     | NME/NM23 family member 5                      |
| YNK1   | NME6    | 2 | Cyt  | 2-0.2-1 | L      | -9.3  | 1.0   | 20.0  | -4.0  |           | NME/NM23 nucleoside diphosphate kinase 6      |
| YNK1   | NME7    | 2 | Cyt  | 2-0.2-1 | A, H   | -9.3  | 1.0   | 20.0  | -4.0  |           | NME/NM23 family member 7                      |
| ALD6   | ALDH1A1 | 3 | Cyt  | 1-0-7   | L      | 1.3   | 1.7   | -2.4  | -3.5  | [183-185] | aldehyde dehydrogenase 1 family member A1     |

| yGene   | hGene   | H | Drug | Cluster | Tissue  | Gem_K | Cyt_K | Gem_L | Cyt_L | Ref       | description_Human                                    |
|---------|---------|---|------|---------|---------|-------|-------|-------|-------|-----------|------------------------------------------------------|
| ALD6    | ALDH1A2 | 3 | Cyt  | 1-0-7   | A, H    | 1.3   | 1.7   | -2.4  | -3.5  |           | aldehyde dehydrogenase 1 family member A2            |
| ALD6    | ALDH1B1 | 3 | Gem  | 1-0-7   | L       | 1.3   | 1.7   | -2.4  | -3.5  | [185]     | aldehyde dehydrogenase 1 family member B1            |
| ALD6    | ALDH7A1 | 3 | Cyt  | 1-0-7   | A       | 1.3   | 1.7   | -2.4  | -3.5  | [185]     | aldehyde dehydrogenase 7 family member A1            |
| CKA2    | CSNK2A1 | 2 | Gem  | 1-0-7   | A       | 1.2   | -0.2  | -2.5  | -1.5  | [186-193] | casein kinase 2 alpha 1                              |
| CKA2    | CSNK2A2 | 2 | Gem  | 1-0-7   | A, L    | 1.2   | -0.2  | -2.5  | -1.5  | [186-193] | casein kinase 2 alpha 2                              |
| CLB2    | CCNA2   | 3 | Gem  | 1-0-7   | L       | 2.0   | 0.4   | -2.2  | 0.6   | [194-197] | cyclin A2                                            |
| CLB2    | CCNB1   | 3 | Gem  | 1-0-7   | L       | 2.0   | 0.4   | -2.2  | 0.6   | [194-197] | cyclin B1                                            |
| EFT2    | EEF2    | 3 | Gem  | 1-0-7   | A       | 0.9   | 0.8   | -2.4  | -1.8  | [198]     | eukaryotic translation elongation factor 2           |
| EFT2    | EFTUD2  | 3 | Gem  | 1-0-7   | A       | 0.9   | 0.8   | -2.4  | -1.8  | [199]     | elongation factor Tu GTP binding domain containing 2 |
| OLA1    | OLA1    | 1 | Gem  | 1-0-7   | A       | 1.0   | 0.8   | -2.6  | -3.0  | [200-202] | Obg like ATPase 1                                    |
| OLA1    | OLA1    | 1 | Cyt  | 1-0-7   | H       | 1.0   | 0.8   | -2.6  | -3.0  | [200-202] | Obg like ATPase 1                                    |
| RPA49   | POLR1E  | 1 | Gem  | 1-0-7   | A, L    | 1.8   | -0.9  | -2.6  | 0.6   | [203-206] | RNA polymerase I subunit E                           |
| SKY1    | SRPK1   | 2 | Gem  | 1-0-7   | A, L    | 0.8   | -0.6  | -2.1  | -1.3  | [207]     | SRSF protein kinase 1                                |
| SNC2    | VAMP8   | 3 | Gem  | 1-0-7   | L       | 1.4   | 0.1   | -2.3  | -0.6  | [208,209] | vesicle associated membrane protein 8                |
| TOP1    | TOP1    | 2 | Gem  | 1-0-7   | A, L    | 1.3   | 0.3   | -3.1  | -3.9  | [210]     | DNA topoisomerase I                                  |
| TOP1    | TOP1MT  | 2 | Both | 1-0-7   | A, H, L | 1.3   | 0.3   | -3.1  | -3.9  |           | DNA topoisomerase I mitochondrial                    |
| YPT6    | RAB34   | 2 | Gem  | 1-0-7   | A, L    | 1.4   | 1.1   | -2.1  | 1.7   | [211-213] | RAB34, member RAS oncogene family                    |
| RPP2B   | RPLP2   | 2 | Gem  | 2-0.8-0 | A       | 1.7   | 0.2   | -5.3  | -2.8  | [214]     | ribosomal protein lateral stalk subunit P2           |
| YGR054W | EIF2A   | 1 | Gem  | 2-0.8-0 | A       | 1.8   | 0.2   | -4.1  | -1.0  | [215]     | eukaryotic translation initiation factor 2A          |

689 Data headers are the same as described above for Table 3. The REMc clusters 1-0-0, 1-0-0 and 2-0.2-1 are deletion enhancing,  
690 while 1-0-7 and 2-0.8-0 are deletion suppressing (see **Fig. 6D-E**).

691 *Autophagy related processes*

692 Autophagy-related processes and complexes consisted of *intraluminal vesicle*  
693 *formation* (1-0-0; *BRO1*, *DOA4*, *DID4*, *VPS24*, *VPS4*), the GATOR/SEACIT/Iml1  
694 complex (*NPR2*, *NPR3*), *autophagosome maturation* (*VAM3*, *CCZ1*), *negative regulation*  
695 *of macroautophagy* (*PHO85*, *PCL5*, *KSP1*, *SIC1*, *PHO80*), and the RAVE complex  
696 (*RAV1*, *RAV2*) (**Fig. 6A**).

697 Of the autophagy-related complexes, Npr2 and Npr3 form an evolutionarily  
698 conserved heterodimer involved in mediating induction of autophagy by inhibition of  
699 TORC1 signaling in response to amino acid starvation [216], and also promoting non-  
700 nitrogen starvation induced autophagy [217] (**Fig. 6A**). The RAVE complex (*RAV1/2*)  
701 promotes assembly of the vacuolar ATPase [218,219], which is required for vacuolar  
702 acidification and efficient autophagy [220]. Gene deletion strains in the term *negative*  
703 *regulation of macroautophagy* (*PHO85*, *PHO80*, and *SIC1*) [221], which seemed from the  
704 automated assessment to suggest an opposing effect, were less compelling following  
705 detailed visualization of the data, due to the associated high shift and cytarabine deletion  
706 enhancing interaction (**Fig. 6A**).

707 Regarding the term *intraluminal vesicle formation*, Vps24 and Did4 are  
708 components of the ESCRT-III complex (see **Figs. 5E** and **6A**), which functions at  
709 endosomes, and the ATPase Vps4 is required for disassembly of the complex [222].  
710 Doa4 interacts with Vps20 of ESCRT-III to promote intraluminal vesicle formation, which  
711 also requires *BRO1* [223]. Pharmacogenomics correlation revealed UES in cancer cell  
712 lines for *DID4/CHMP2A/CHMP2B* (**Fig. 6D; 1-0-10**). During autophagy, *CHMP2A*  
713 translocates to the phagophore to regulate separation of the inner and outer  
714 autophagosomal membranes to form double-membrane autophagosomes [171].  
715 *CHMP2B* is a member of the ESCRT-III complex required for efficient autophagy and

716 has reduced expression in melanoma [172,173], raising the hypothesis that gemcitabine  
717 could have efficacy in that context.

718 Other genes involved in autophagy-related processes that had human homologs  
719 UES in cancer cell lines included: (1) *PEP12/STX12* (**Fig. 6D; 1-0-10**), a t-SNARE  
720 required for mitophagy [180], for which underexpression is associated with risk of  
721 recurrence [181]; and (2) *VPS30/BECN1*, knockdown of which enhances gemcitabine  
722 cytotoxicity in pancreatic cancer stem cells [170]. Furthermore, gemcitabine treatment  
723 has been found to upregulate autophagy in pancreatic or breast cancer, which buffers  
724 drug cytotoxicity as inferred by the combination of gemcitabine with autophagy inhibitors  
725 increased killing of cancer cells [224-226]. Thus, autophagy-related findings from the  
726 yeast model appear consistent with and to build upon previous cancer cell models.

727

#### 728 *Histone modification and chromatin remodeling*

729 GTF/REMc identified the Hda1 and Set1C/COMPASS (1-0-0) complexes as  
730 gemcitabine-specific deletion enhancing, which was confirmed by term-specific  
731 heatmaps (**Fig. 6B**). The Set1C complex has been characterized to have a role in cell  
732 cycle coordination [227], which may be reflected by greater deletion enhancing  
733 interaction for the K than for the L CPP. The Set1C/COMPASS complex catalyzes  
734 mono-, di-, and tri- methylation of histone H3K4, which can differentially influence gene  
735 transcription depending on the number of methyl groups added [228-231], and was  
736 implicated by *BRE2*, *SWD1*, *SWD3*, *SDC1*, *SPP1*, and *SHG1* (**Fig. 6B**). The SWD1  
737 ortholog, *RBBP5*, which was UES with gemcitabine in lung tissue (**Additional File 8,**  
738 **File C; 1-0-4**), is upregulated in self-renewing cancer stem cells in glioblastoma and  
739 necessary for their self-renewal, is involved in the epithelial-mesenchymal transition in  
740 prostate cancer cells via its role in H3K4 trimethylation, and is upregulated in

741 hepatocellular carcinoma [232-235]. Furthermore, gemcitabine sensitivity of pancreatic  
742 cancer cell lines was enhanced by H3K4me3 inhibition with verticillin A [233].

743 Histone deacetylases also influence cell cycle regulation [236], and the three  
744 genes that make up the yeast Hda1 deacetylase complex (homologous to mammalian  
745 class II Hda1-like proteins [237,238]) were gemcitabine deletion enhancers (**Fig. 6B**).  
746 Similar effects in cancer cells include *HDAC6* knockdown in pediatric acute myeloid  
747 leukemia cells, which enhances cytarabine-induced apoptosis [158-160] and the use of  
748 histone deacetylase inhibitors in combination with gemcitabine, which augments killing of  
749 pancreatic cancer cell lines [161-165] and HeLa cells [99].

750

#### 751 *Peptidyl-tyrosine dephosphorylation*

752 REMc/GTF identified peptidyl-tyrosine dephosphorylation (1-0-0), for which the  
753 term specific heatmap (**Additional File 7**) revealed six genes previously characterized  
754 for their requirement in oxidant-induced cell cycle arrest and RNA virus replication  
755 [239,240], *OCA1-6*. Two additional tyrosine phosphatases, *YMR1*, and *PTP1*, had similar  
756 interaction profiles (**Fig. 6C**). *OCA1-3* deletions enhance growth defects associated with  
757 reactive oxygen species or caffeine treatment [239,240], and *OCA1-4* and *OCA6* are  
758 deletion suppressors of the *cdc13-1* mutation [241]. Although it does not have a tyrosine  
759 phosphatase motif, *Oca5* deletion also displayed gemcitabine-specific enhancement,  
760 consistent with the other genes annotated to this module (**Fig. 6C**). However, due to the  
761 regulatory nature and limited evolutionary conservation of tyrosine phosphorylation, it is  
762 not obvious how to predict functionally homologous genetic modules in cancer cells.

763

#### 764 *Elongator holoenzyme complex and protein urmylation*

765 By GTA, K interactions revealed *protein urmylation* (*NCS6*, *NCS2*, *UBA4*, *ELP6*,  
766 *ELP2*, *URM1*, and *URE2*) and the Elongator holoenzyme complex (*IKI1*, *IKI3*, *ELP2*,

767 *ELP3*, *ELP4*, and *ELP6*) (**Additional File 2, Fig. S4**). Protein urmylation involves the  
768 covalent modification of lysine residues with the ubiquitin-related modifier, Urm1 [242].  
769 The Elongator holoenzyme complex has function in tRNA wobble position uridine  
770 thiolation (**Additional File 2, Fig. S4**), which occurs using Ure1 as a sulfur carrier [243-  
771 245]. The two processes share the *ELP2* and *ELP6* genes and may be distinct modules  
772 buffering gemcitabine cytotoxicity. However, several genes involved in tRNA wobble  
773 uridine modification have roles in cancer development and deficiency in this pathway  
774 enhances targeted therapy in melanoma [246,247], implicating this module as potentially  
775 important for personalized anti-cancer efficacy of gemcitabine.

776

#### 777 *Gemcitabine-buffering by non-GO-enriched yeast-human homologs*

778 Homologs with correlated gemcitabine-specific yeast gene deletion enhancement  
779 and cancer cell UES (clusters 2-0.2-1, 1-0-10, and 1-0-0) included the family of  
780 nucleoside diphosphate kinases (NDKs) (**Fig. 6D; Table 4**). A single member of the  
781 NDK family, *YNK1*, exists in yeast, while the human genome encodes several paralogs  
782 (*NME* genes) (**Additional File 8, File A**). The NDKs transfer the gamma phosphate of  
783 ATP to nucleoside diphosphate as the final step of purine and pyrimidine nucleoside and  
784 deoxynucleoside triphosphate biosynthesis and salvage [248,249]. Thus, NDK appears to  
785 modulate gemcitabine toxicity by differential activity for endogenous substrates vs.  
786 nucleoside analog drugs. In yeast, deletion enhancement by *YNK1* was selective for  
787 gemcitabine, however the effects in cancer cells are potentially more complex due to  
788 multiple NDK genes. In PharmacODB, *NME3* and 5 were UES for gemcitabine, while  
789 *NME4*, 6, and 7 were OES for cytarabine, implicating differential specificity of *NME*  
790 genes for natural and/or medicinal nucleosides as well as possibly influences of other  
791 kinases, which have, for example, been shown to act on gemcitabine diphosphate [250].  
792 *NME5* overexpression was previously associated with gemcitabine-resistant cancer, and

793 its knockdown can increase gemcitabine efficacy [182]. Thus, the anti-cancer efficacy of  
794 gemcitabine could be influenced by differential expression and activity of NDK isoforms  
795 across tissues [251], such that NME gene expression could be predictive of response to  
796 nucleoside analogs, or perhaps targeted for synergistic anti-tumor activity.

797 *KEX2* is the yeast member of the calcium-dependent proprotein convertase  
798 subtilisin/kexin type serine proteases, which functions in the secretory pathway. Four of  
799 the seven human homologs of *KEX2* were UES in the pharmacogenomics analysis (**Fig.**  
800 **6D; 1-0-10**), including: (1) *PCSK1*, which can be downregulated by pancreatic cancer  
801 derived exosomes [176], (2) *PCSK2*, which has reduced expression in lung cancer [177],  
802 (3) *PCSK5*, which is also reduced in lung cancer and, furthermore, when reduced in  
803 triple negative breast cancer, leads to loss of the Gdf11 tumor suppressor [177,178], and  
804 (4) *PCSK7*, which has been reported both to have reduced expression in lung cancer  
805 and increased expression in gemcitabine resistant cells [177,179]. Thus, loss of this gene  
806 family may create cancer-specific vulnerabilities to gemcitabine cytotoxicity.

807 *NMA1* and its human homologs *NMNAT1*, *NMNAT2*, and *NMNAT3* are nicotinic  
808 acid mononucleotide adenylyltransferases involved in NAD biosynthesis and  
809 homeostasis, which were found to be UES for both gemcitabine and cytarabine (**Fig. 6D,**  
810 **1-0-0**). Loss of function mutations and underexpression of *NMNAT1* are associated with  
811 increased rRNA expression and sensitivity to DNA damage in lung cancer cell lines  
812 [166], consistent with the hypothesis that they could have deletion enhancing therapeutic  
813 benefit in cancers treated with gemcitabine or cytarabine.

814 *RAD54* is a DNA-dependent ATPase that stimulates strand exchange in  
815 recombinational DNA repair, which is a known vulnerability of cancer [252]. The human  
816 homolog of *RAD54*, *ATRX*, was UES by PharmacODB analysis (**Fig. 6D, 1-0-0**), and loss  
817 of *ATRX* has been associated with improved response to gemcitabine plus radiation  
818 therapy in glioma patients with *IDH1* mutations [168].



819 *SCS2/VAPB* is an integral ER membrane protein that was deletion enhancing  
820 and UES for gemcitabine (**Fig. 6D, 1-0-0**). *VAPB* regulates phospholipid metabolism and  
821 interacts with *ACBD5* (also described above) to promote ER-peroxisome tethering [100]  
822 and promotes proliferation in breast cancer via *AKT1* [169].

823 *YPT32/RAB2A/RAB2B* (**Fig. 6D, 1-0-0**) is a Rab family GTPase involved in the  
824 trans-Golgi exocytic pathway, which accumulates during replication stress in yeast [155].  
825 *RAB2A* overexpression promotes breast cancer stem cell expansion and tumorigenesis  
826 [174], and downregulation of *RAB2B* by miR-448 promotes cell cycle arrest and  
827 apoptosis in pancreatic cancer cells [175].

828 *CLB5*, a B-type cyclin, is involved in initiation of DNA replication and G1-S  
829 progression, for which promoter hypermethylation of the human homolog, *CCNA1*, is  
830 associated with multiple cancers [157], and which was found to be UES with gemcitabine  
831 (**Fig. 6D, 1-0-0**).

832

### 833 *Gemcitabine-specific gene deletion suppression*

834 Representing this class of gene interaction, pharmacogenomics integration is  
835 highlighted for clusters 2-0.8-0 and 1-0-7 (**Fig. 6E**). Although there was limited Gene  
836 Ontology enrichment, the term *phosphatidylserine biosynthetic process* (*UME6* and  
837 *CHO1*), and the GARP (*VPS51-54*), and Lem3p-Dnf1p complexes were identified (**Fig.**  
838 **6F, Table 2**). Ume6 is involved in both positive and negative regulation of the  
839 phosphatidylserine synthase, Cho1 [253,254]. Phosphatidylserine exposure to the  
840 plasma membrane is a marker of yeast and mammalian apoptosis [255], the latter of  
841 which is induced by gemcitabine [256]. In pancreatic cancer cells, addition of the  
842 sphingolipid, sphingomyelin, enhances gemcitabine cytotoxicity through increased  
843 apoptosis [256,257]. Moreover, GARP complex deficiency leads to reduction of  
844 sphingomyelin [258], and accumulation of sphingolipid intermediates, consistent with the

845 hypothesis that reduced sphingolipid metabolism alleviates gemcitabine-mediated  
846 apoptosis. Lem3 complexes with Dnf1 or Dnf2 to form phospholipid flippases at the  
847 plasma and early endosome/trans-Golgi network membranes and regulate  
848 phosphatidylethanolamine and phosphatidylserine membrane content [259,260],  
849 potentially further influencing the apoptotic response. The Lem3-Dnf1 and Lem3-Dnf2  
850 flippases are regulated by the serine/threonine kinase Fpk1 [261], which is also a  
851 gemcitabine-specific deletion suppressor (**Fig. 6F**).

852

853 *Correlation of gemcitabine-specific gene deletion suppression with OES in cancer cells*

854 Although yeast genes associated with GO-enriched terms from gemcitabine-  
855 specific deletion suppression (2-0.8-0 and 1-0-7) did not have human homologs that  
856 were OES in GDSC, several homologs of 'non-GO-enriched' genes were OES (**Fig. 6E**;  
857 **Table 4**). These included: (1) *YGR054W/EIF2A*, a eukaryotic initiation factor orthologous  
858 between yeast and human that has been implicated in translation of upstream ORFs as  
859 part of tumor initiation [215]. Thus, gemcitabine treatment in the context of EIF2A  
860 overexpression may increase efficacy; (2) *EFT2/EEF2/EFTUD2* (eukaryotic translation  
861 elongation factor 2), which further implicates translational regulation as a gemcitabine-  
862 targetable cancer driver. *EEF2* is overexpressed in numerous cancer types [198] and  
863 *EFTUD2* knockdown induces apoptosis in breast cancer cells [199]; (3) *RPP2B/RPLP2*,  
864 a component of the 60S ribosomal subunit stalk that is overexpressed in gynecologic  
865 cancer [214], again suggesting dysregulated translation promotes gemcitabine toxicity;  
866 (4) *RPA49/POLR1E*, a component of Pol1 [203-205] that has higher expression in  
867 bladder cancer and has been recently proposed as a novel target for anti-cancer therapy  
868 [206]; (5) *OLA1/OLA1* is a GTPase that is conserved from human to bacteria [200]. It is  
869 implicated in regulation of ribosomal translation [201] and has increased expression  
870 associated with poorer survival in lung cancer patients [202]. The interactions described

871 above suggest gemcitabine may be more effective in the context of “oncogenic  
872 ribosomes” [262]. (6) *CKA2*, the alpha catalytic subunit of casein kinase 2, has two  
873 human homologs, *CSNK2A1* and *CSNK2A2*, which were OES with gemcitabine. They  
874 can be upregulated in cancer [186-191] and are considered targets for treatment [193]; (7)  
875 *CLB2/CCNA2/CCNB1*, a B-type cyclin involved in cell cycle progression, of which both  
876 *CCNA2* and *CCNB1* are overexpressed in breast and colorectal cancer [194-197].  
877 Moreover, the observation that *CLB2* deletion (suppressing effect) opposes that of *CLB5*  
878 (deletion enhancing; see above **Fig. 6D**, 1-0-0) has been previously described in the  
879 context of loss of the S-phase checkpoint [263]; (8) *SKY1/SRPK1* (serine-arginine rich  
880 serine-threonine kinase), which is overexpressed in glioma, and prostate, breast, and  
881 lung cancer [207]; (9) *SNC2/VAMP8*, which functions in fusion of Golgi-derived vesicles  
882 with the plasma membrane and is overexpressed in glioma and breast cancer [208,209];  
883 (10) *YPT6/RAB34*, which functions in fusion of endosome-derived vesicles with the late  
884 Golgi and is overexpressed in glioma, breast cancer, and hepatocellular carcinoma [211-  
885 213]; (11) *TOP1/TOP1/TOP1MT*, Topoisomerase I, which has increased copy number in  
886 pancreatic and bile duct cancer [210]; (12) *ALD6*, which encodes cytosolic aldehyde  
887 dehydrogenase, and was a deletion suppressor for both gemcitabine and cytarabine,  
888 having multiple homologs that were OES (*ALDH1A1*, *ALDH1A2*, *ALDH1B1*, and  
889 *ALDH7A1*. *ALDH1B1*). Overexpression of ALDH genes is observed in colorectal and  
890 pancreatic cancer [183,184] and is a prognostic marker of cancer stem cells [185].

891

## 892 **Cytarabine-specific gene interaction modules**

### 893 *Cytarabine-specific gene deletion enhancement*

894 Cytarabine-specific deletion enhancement suggests functions that buffer cytotoxic  
895 effects of cytarabine to a greater extent than gemcitabine, potentially informing on  
896 differential activities of the drugs. There was no notable GO enrichment by REMc/GTF,

897 but four functions of potential relevance were revealed by GTA (**Fig. 7A, Table 2**). Two  
898 of them, the *HIR complex* (*HIR1-3, HPC2*) and *sphinganine kinase activity* (*LCB4, LCB5*)  
899 were relatively weak, being deletion enhancing only for the L CPP (**Fig. 7A**). *LCB4/5*  
900 homologs that were UES in PharmacoDB included: (1) *CERKL* (**Additional File 8, Files**  
901 **B-C; 1-0-6**), a ceramide kinase like gene that regulates autophagy by stabilizing *SIRT1*  
902 [264], a gene mentioned above for its inhibition being synergistic with cytarabine against  
903 acute lymphoblastic leukemia cells [138], and (2) *AGK*, which is overexpressed in  
904 hepatocellular carcinoma, glioma, breast, and cervical squamous cell cancers [265-268].  
905 Two stronger interaction modules, evidenced by deletion enhancement for both the K  
906 and L CPPs, were *protein localization to septin ring* (*HSL1* and *ELM1*) and the *Sec61*  
907 *translocon complex* (*SBH1, SBH2, and SEC61*) (**Fig. 7A, Table 2**). In yeast, Hsl1 and  
908 Elm1 are annotated as “bud sensors” to recruit Hsl7 to the septin ring at the bud site to  
909 degrade the mitotic inhibitor, Swe1 [269]. The *HSL1* homologs, *BRSK1* and *BRSK2*,  
910 were UES in the cancer data. *BRSK1* is mutated in gastric and colorectal carcinoma  
911 [270] and its decreased expression is associated with breast cancer [271], but *BRSK2* is  
912 overexpressed in pancreatic cancer, where it is AKT-activating [272]. PharmacoDB also  
913 identified the *SEC61* homolog, *SEC61A1*, which is upregulated in colon adenocarcinoma  
914 tissue [273].

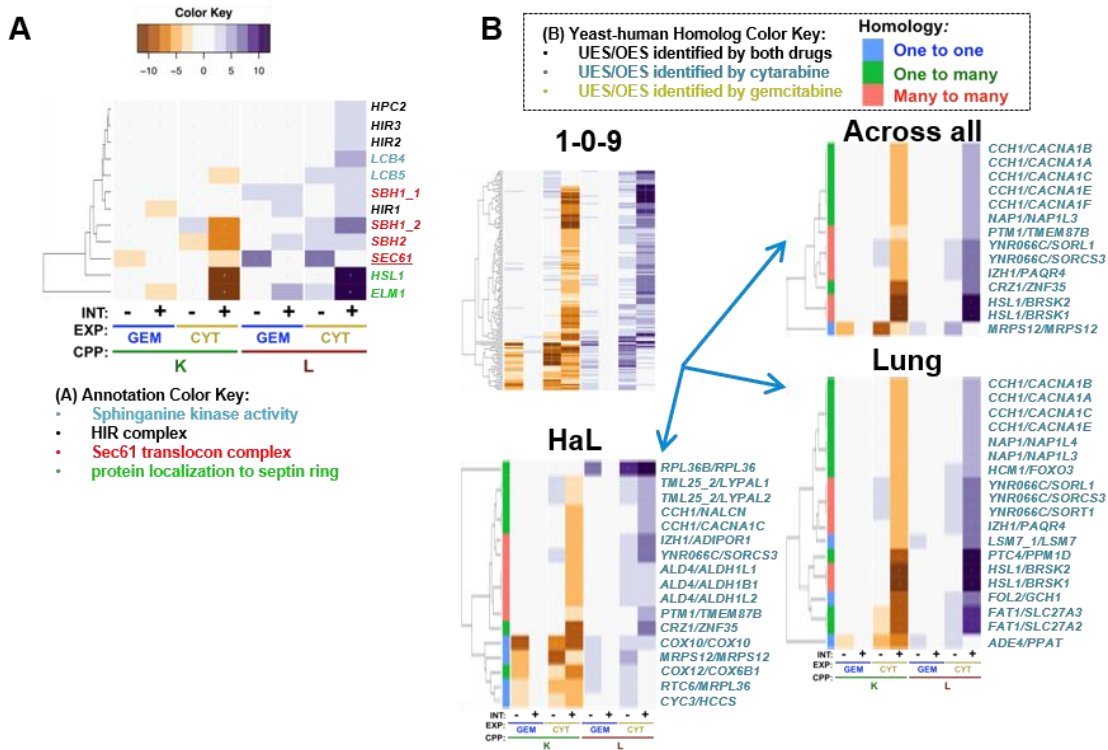

915

916

917

**Figure 7. Cytarabine-specific gene interaction. (A)** GO terms identified by GTA that

918

revealed deletion enhancement to be greater for cytarabine than gemcitabine. **(B)**

919

Human homologs of cytarabine-specific yeast gene deletion enhancers found to exhibit

920

underexpression sensitivity for cytarabine in cancer cell lines.

921  
922

**Table 5. Yeast-human homologs predicted to buffer cytarabine to greater degree than gemcitabine.**

| yGene | hGene   | H | Drug | Cluster | Tissue  | Gem_K | Cyt_K | Gem_L | Cyt_L | Ref       | description_Human                               |
|-------|---------|---|------|---------|---------|-------|-------|-------|-------|-----------|-------------------------------------------------|
| CCH1  | CACNA1A | 2 | Cyt  | 1-0-9   | A, L    | 0.2   | -4.5  | 0.5   | 5.5   | [274]     | calcium voltage-gated channel subunit alpha1 A  |
| CCH1  | CACNA1B | 2 | Cyt  | 1-0-9   | A, L    | 0.2   | -4.5  | 0.5   | 5.5   | [274]     | calcium voltage-gated channel subunit alpha1 B  |
| CCH1  | CACNA1C | 2 | Cyt  | 1-0-9   | A, H, L | 0.2   | -4.5  | 0.5   | 5.5   | [274]     | calcium voltage-gated channel subunit alpha1 C  |
| CCH1  | CACNA1E | 2 | Cyt  | 1-0-9   | A, L    | 0.2   | -4.5  | 0.5   | 5.5   | [274]     | calcium voltage-gated channel subunit alpha1 E  |
| CCH1  | CACNA1F | 2 | Cyt  | 1-0-9   | A       | 0.2   | -4.5  | 0.5   | 5.5   | [274]     | calcium voltage-gated channel subunit alpha1 F  |
| CCH1  | NALCN   | 2 | Cyt  | 1-0-9   | H       | 0.2   | -4.5  | 0.5   | 5.5   |           | sodium leak channel, non-selective              |
| FAT1  | SLC27A2 | 2 | Cyt  | 1-0-9   | L       | 0.7   | -8.5  | -0.9  | 8.9   | [275]     | solute carrier family 27 member 2               |
| FAT1  | SLC27A3 | 2 | Cyt  | 1-0-9   | L       | 0.7   | -8.5  | -0.9  | 8.9   | [276]     | solute carrier family 27 member 3               |
| FOL2  | GCH1    | 1 | Cyt  | 1-0-9   | L       | -0.9  | -9.4  | 0.7   | 7.1   | [277]     | GTP cyclohydrolase 1                            |
| HSL1  | BRSK1   | 3 | Cyt  | 1-0-9   | A, L    | 0.9   | -10.4 | 0.1   | 11.6  | [270,271] | BR serine/threonine kinase 1                    |
| HSL1  | BRSK2   | 3 | Cyt  | 1-0-9   | A, L    | 0.9   | -10.4 | 0.1   | 11.6  | [272]     | BR serine/threonine kinase 2                    |
| IZH1  | ADIPOR1 | 3 | Cyt  | 1-0-9   | H       | 1.1   | -5.8  | -0.4  | 7.6   | [278,279] | adiponectin receptor 1                          |
| IZH1  | PAQR4   | 3 | Cyt  | 1-0-9   | A, L    | 1.1   | -5.8  | -0.4  | 7.6   |           | progesterin and adipoQ receptor family member 4 |
| NAP1  | NAP1L3  | 2 | Cyt  | 1-0-9   | A, L    | 1.0   | -4.7  | -1.5  | 5.6   | [280]     | nucleosome assembly protein 1 like 3            |
| NAP1  | NAP1L4  | 2 | Cyt  | 1-0-9   | L       | 1.0   | -4.7  | -1.5  | 5.6   |           | nucleosome assembly protein 1 like 4            |
| PTM1  | TMEM87B | 3 | Cyt  | 1-0-9   | A, H    | -0.7  | -3.8  | -0.2  | 5.7   | [281]     | transmembrane protein 87B                       |

923

924 The data descriptions are the same as for Table 3.

925 *Human genes that have deletion enhancing yeast homologs and confer cytarabine UES*

926 We identified human genes that were UES to cytarabine and homologous to  
927 yeast genes in REMc clusters (1-0-9 and 2-0.13-0) displaying a pattern of cytarabine-  
928 specific deletion enhancement (**Fig. 7B; Table 5**). Cancer-relevant examples include:  
929 (1) Ptm1, which is a protein of unknown function that copurifies with late Golgi vesicles  
930 containing the v-SNARE, Tlg2p, but interestingly, its human homologs, *TMEM87A* and  
931 *TMEM87B*, were UES for cytarabine and identified in a study focused on cytarabine  
932 efficacy in acute myelogenous leukemia [281].  
933 (2) *NAP1/NAP1L3/NAP1L4*, which is a nucleosome assembly protein involved in nuclear  
934 transport and exchange of histones H2A and H2B and also interacts with Clb2, is  
935 phosphorylated by CK2, and has protein abundance that increases in response to DNA  
936 replication stress [155]. *NAP1L3* is overexpressed in breast cancer [280].  
937 (3) *CCH1*, which is a voltage-gated high-affinity calcium channel with several homologs  
938 that were UES, including: *CACNA1A*, underexpressed in breast, colorectal, esophageal,  
939 gastric, and brain cancers; *CACNA1B*, underexpressed in breast and brain cancers;  
940 *CACNA1C*, underexpressed in brain, bladder, lung, lymphoma, prostate, and renal  
941 cancers; *CACNA1E*, underexpressed in breast, brain, gastric, leukemia, lung, and  
942 prostate cancers; and *CACNA1F*, underexpressed in lymphoma [274];  
943 (4) *IZH1*, a yeast membrane protein involved in zinc ion homeostasis, having a human  
944 homolog, *PAQR1/ADIPOR1* that encodes the adiponectin receptor protein 1, which is  
945 differentially regulated in breast cancers [278,279];  
946 (5) *FAT1*, a yeast fatty acid transporter and very long-chain fatty acyl-CoA synthetase  
947 that corresponds to *SLC27A2* (very long-chain acyl Co-A synthetase), which is  
948 underexpressed in lung cancer [275], and *SLC27A3* (long-chain fatty acid transport),  
949 which is hypermethylated in melanoma [276];

950 (6) *FOL2/GCH1*, a GTP-cyclohydrolase that catalyzes the first step in folic acid  
951 biosynthesis. Downregulation of *GCH1* occurs in esophageal squamous cell carcinoma  
952 [277].

953

954 **Discussion:**

955 Informative phenomic models have been developed for multiple human diseases,  
956 including cystic fibrosis, neurodegenerative disorders, and cancer [30,282-284]. Molecular  
957 models include mutations in conserved residues of yeast homologs of a disease gene  
958 and introduction of human alleles into yeast. Complementation of gene functions by  
959 human homologs, and *vice versa*, has demonstrated evolutionary conservation of gene  
960 functions [285-287]. Like their basic functions, gene interactions are conserved [288,289]  
961 and yeast is unique in its capability to address complex genetic interactions  
962 experimentally [290]. Here, we model how yeast phenomic assessment of gene-drug  
963 interaction could be employed as part of a precision oncology paradigm to predict  
964 efficacy of cytotoxic chemotherapy based on the unique cancer genetic profiles of  
965 individual patients.

966 To model the networks that buffer deoxyribonucleoside analogs, we humanized  
967 yeast by introducing deoxycytidine kinase into the YKO/KD strain collection, as yeast do  
968 not encode dCK in their genomes, and thus cannot activate the unphosphorylated drugs.  
969 We hypothesized that gemcitabine and cytarabine would have different buffering  
970 profiles, despite their similar mechanisms of action, due to their distinct anti-cancer  
971 efficacies. Results of the unbiased yeast phenomic experiments confirmed this  
972 expectation, revealing distinct, though partially overlapping, gene interaction networks.  
973 Differential interaction predominated despite the similarity of the molecules, illustrating  
974 that distinct mechanisms for buffering anti-cancer cytotoxic drug responses can be



975 inferred from yeast phenomics and thus applied to predict how an individual's cancer  
976 genome could influence responses to treatment [3,5].

977 Deletion enhancement of both gemcitabine and cytarabine suggested processes  
978 that function to buffer nucleoside analog cytotoxicity in common (**Fig. 5**), in contrast to  
979 buffering mechanisms that acted differentially in response to the drugs. Functionally  
980 enriched processes that buffered both drugs to a similar extent included the intra-S DNA  
981 damage checkpoint, positive regulation of DNA-dependent DNA replication initiation,  
982 vesicle fusion with vacuole, and the Mre11, checkpoint clamp, RecQ helicase-Topo III,  
983 CORVET, HOPS, ESCRT, GET, Ubp3-Bre5 deubiquitination complexes.

984 Among the drug-specific deletion enhancing interactions, autophagy, histone  
985 modification, chromatin remodeling, and peptidyl-tyrosine dephosphorylation buffered  
986 gemcitabine more so than cytarabine (**Fig. 6**). There were only a few cytarabine-specific  
987 deletion enhancing GO-enriched terms, but there were many individual genes with  
988 human homologs having cancer relevance that buffered cytarabine relatively specifically  
989 (**Fig. 7**). On the other hand, genes that preferentially promote cytotoxicity were observed  
990 primarily for gemcitabine, and enriched functions were related to apoptosis, including  
991 phosphatidylserine biosynthesis, and the GARP and Lem2/3 complexes (**Fig. 6**).

992 The model we constructed incorporates the powerful pharmacogenomics  
993 datasets and analysis tools from PharmacoDB, mining them by integration of yeast  
994 phenomic drug-gene interaction experiments. We integrated yeast phenomic and  
995 PharmacoDB data to identify, across the respective datasets, correlations between  
996 deletion enhancement and underexpression sensitivity or deletion suppression and  
997 overexpression sensitivity. Deletion enhancement indicates genes that are biomarkers  
998 and synergistic targets to augment drug efficacy and expand the therapeutic window,  
999 whereas deletion suppression identifies genes that promote drug cytotoxicity, and thus  
1000 confer sensitivity when hyper-functional and resistance when deficient. A particularly

1001 attractive class of drug-gene interaction is overexpression sensitivity involving driver  
1002 genes, however anti-cancer efficacy could be conferred by lethal drug-gene interactions  
1003 involving passenger genes, tumor suppressor genes, or components of genetic buffering  
1004 networks that become compromised due to genomic instability (**Fig. 1A**). The cancer  
1005 literature revealed many deletion enhancing/UES and deletion suppressing/OES genes  
1006 to have roles in cancer, suggesting that integration of yeast phenomic models and  
1007 pharmacogenomics data could have clinical utility for choosing cytotoxic treatments  
1008 based on gene expression profiles of individual cancers. While predictions sometimes  
1009 involved GO-enriched processes, often the genes were identified individually.

1010         The utility of phenomic data (i.e., Q-HTCP of the YKO/KD library) to help predict  
1011 causal associations between gene expression changes and cell sensitivity in response  
1012 to drugs derives from prior work demonstrating that genes differentially expressed after  
1013 drug treatment do not significantly overlap with those that influence sensitivity and  
1014 resistance [52]. As far as we know, this work represents the first application of this  
1015 fundamental observation from yeast to systems level experimental data from human  
1016 cells. Literature-based validations of the yeast phenomic model of nucleoside analogs in  
1017 human cancer cell lines and other cancer models are exemplified in **Table 6**. These  
1018 examples illustrate that integrative, systems level drug-gene interaction modeling  
1019 employing the experimental power of *S. cerevisiae* phenomics could be applicable to  
1020 cancer genomic profiling for systems level, precision oncology.

1021 **Table 6. Disease relevance of buffering interactions from the yeast phenomic**  
 1022 **model evidenced by the cancer biology literature.**

1023  
 1024

| Gene (yeast/human) | Process/Complex                        | Description (human)                           | Ref        | Nucleoside analog relevance                                                                                                                                                                  |
|--------------------|----------------------------------------|-----------------------------------------------|------------|----------------------------------------------------------------------------------------------------------------------------------------------------------------------------------------------|
| RAD24/RAD17        | DNA damage checkpoint                  | RAD17 checkpoint clamp loader component       | [74]       | Depletion of RAD17 sensitizes pancreatic cancer cells to gemcitabine                                                                                                                         |
| RAD50/RAD50        | Mre11 complex                          | RAD50 double strand break repair protein      | [127]      | Depletion of human Rad50 sensitizes Ataxia-telangiectasia (AT) fibroblasts to gemcitabine                                                                                                    |
| HDA1/HDAC6         | Hda1 complex; histone deacetylation    | histone deacetylase 6                         | [160, 165] | HDAC inhibitors enhance sensitivity to gemcitabine in pancreatic cancer cells and are associated with reduction of HDAC6; HDAC6 inhibition induces apoptosis in cytarabine treated AML cells |
| RAD54/ATRAX        | Chromatin remodeling                   | ATRAX, chromatin remodeler                    | [168]      | Glioma patients with IDH1 mutations and loss of ATRAX had improved response to gemcitabine plus radiation therapy                                                                            |
| KEX2/PCSK7         | serine-type endopeptidase activity     | proprotein convertase subtilisin/kexin type 7 | [179]      | Overexpressed in gemcitabine resistant pancreatic cancer cell lines                                                                                                                          |
| YNK1/NME5          | Nucleoside diphosphate phosphorylation | NME/NM23 family member 5                      | [182]      | Depletion of NME5 sensitizes gemcitabine-resistant cancer cell lines to gemcitabine                                                                                                          |
| VPS30/BECN1        | Autophagy                              | beclin 1                                      | [170]      | Depletion of <i>BECN1</i> sensitizes pancreatic cancer stem cells to gemcitabine                                                                                                             |
| LCB4/5/CERKL       | sphinganine kinase activity            | ceramide kinase like                          | [138, 264] | CERKL stabilizes SIRT1, SIRT1 chemical inhibition sensitizes acute myeloid leukemia cells to cytarabine                                                                                      |

1025

1026 Deletion-enhancing/UES drug-gene interactions are highlighted; most exemplify loss of  
 1027 buffering functions that lead to increased drug sensitivity; however, there is one instance  
 1028 (KEX2/PCSK7) of overexpression of the buffering gene that increases drug resistance.

1029           In summary, the yeast phenomic model of nucleoside analog toxicity appears to  
1030 serve as a valuable resource for interpreting cancer pharmacogenomics data regarding  
1031 gene-drug interaction that could be predictive of patient-specific chemotherapeutic  
1032 efficacy. Since it's not possible to collect comparable phenomic information from human  
1033 populations or cancerous tissue alone [5], systems level yeast phenomic models can  
1034 help expand and integrate relevant (i.e., evolutionarily conserved) aspects of the  
1035 extensive cancer literature with regard to cancer-specific vulnerabilities to cytotoxic  
1036 therapies. A deeper understanding of how genomic instability influences the genetic  
1037 network that buffers chemotherapeutic agents like nucleoside analogs could guide future  
1038 research to personalize anti-cancer therapies based on cancer genomic profiles unique  
1039 to individual patients. Thus, a future direction for this work should include development  
1040 of algorithms that prospectively predict chemotherapy response in individual patient  
1041 cancer cells, which could be tested as part of a prognostic evaluation. Most cytotoxic  
1042 chemotherapeutic agents are used in combination, so another direction for yeast  
1043 phenomic analysis of anti-cancer agents would be to characterize clinically relevant drug  
1044 combinations.

1045

#### 1046 **Conclusions:**

1047           A humanized yeast phenomic model of deoxycytidine kinase was developed to  
1048 map drug-gene interactions modulating anti-proliferative effects of nucleoside analogs in  
1049 a eukaryotic cell and to investigate the relevance of the resulting networks for precision  
1050 oncology by integration with cancer pharmacogenomics-derived associations between  
1051 gene expression and cancer cell line drug sensitivity. The yeast phenomic model  
1052 revealed gene-drug interaction for the two deoxycytidine analogs, gemcitabine and  
1053 cytarabine, to be largely different, consistent with the distinct types of cancer for which  
1054 they are used clinically. The model overall suggested evolutionary conservation of drug-

1055 gene interaction that could be used as a resource to predict anti-cancer therapeutic  
1056 efficacy based on genetic information specific to individual patients' tumors. Yeast  
1057 phenomics affords a scalable, high-resolution approach to model, at a systems level, the  
1058 genetic requirements for sensitivity and resistance to cytotoxic agents and thus the  
1059 potential to resolve complex influences of genetic variation on drug response to more  
1060 accurately. Global and quantitative models of the distinct genetic buffering networks  
1061 required to maintain cellular homeostasis after exposure to chemotherapeutic agents  
1062 could aid precision oncology paradigms aimed at identifying composite genomic  
1063 derangements that create enhanced cancer cell-specific vulnerabilities to particular anti-  
1064 cancer drugs.

1065

1066

1067 **Supplementary Materials:**

1068 **Additional File 1. Supplemental tables: Tables S1-S6. Table S1.** Primers used in  
1069 strain construction (see **Fig. S1**). **Table S2.** YKO/KD strains with gemcitabine. **Table S3.**  
1070 Reference cultures with gemcitabine. **Table S4.** YKO/KD strains with cytarabine. **Table**  
1071 **S5.** Reference cultures with cytarabine. **Table S6.** Ranges of interaction z-scores for the  
1072 YKO/YKD and Reference cultures from the phenomic analysis of gemcitabine and  
1073 cytarabine drug-gene interaction.

1074

1075 **Additional File 2. Supplemental figures. Figure S1.** Construction of tet-inducible dCK  
1076 allele. **Figure S2.** Reference r and AUC distributions with gemcitabine or cytarabine  
1077 treatment. **Figure S3.** High shift or weak nucleoside analog gene deletion suppression  
1078 modules. **Figure S4.** Elongator holoenzyme complex, protein urmylation, and tRNA  
1079 wobble position uridine thiolation buffer gemcitabine cytotoxicity.

1080

1081 **Additional File 3. Interaction plots for gemcitabine.** Genome-wide analysis for **(A)**  
1082 YKO, **(B)** KD, and **(C)** reference strains with gemcitabine. See also methods and  
1083 **Additional File 2.**  
1084  
1085 **Additional File 4. Interaction plots for cytarabine.** Genome-wide analysis for **(A)**  
1086 YKO, **(B)** KD, and **(C)** reference strains with cytarabine. See also methods and  
1087 **Additional File 2.**  
1088  
1089 **Additional File 5. REMc results, plotted as drug-gene interaction profile heatmaps**  
1090 **and assessed for Gene Ontology enrichment using GTF. File A** contains REMc  
1091 results and associated gene interaction and shift data. **File B** is the heatmap  
1092 representation of each REMc cluster after incorporating shift values and hierarchical  
1093 clustering. **File C** contains the GTF results obtained for REMc clusters for the three  
1094 ontologies – process, function, and component.  
1095  
1096 **Additional File 6. Gene Ontology Term Averaging (GTA) results and interactive**  
1097 **plots. File A** contains all GTA values, cross-referenced with REMc-enriched terms. **File**  
1098 **B** displays GTA L values associated with above-threshold GTA scores (see note below)  
1099 plotted for gemcitabine vs. cytarabine. **File C** displays GTA K values associated with  
1100 above-threshold GTA scores (see note below) plotted for gemcitabine vs. cytarabine.  
1101 **Files B-C** should be opened in an Internet web browser so that embedded information  
1102 from **Additional File 6A** can be viewed by scrolling over points on the graphs. Subsets  
1103 in each of the plots can be toggled off and on by clicking on the respective legend label.  
1104 In the embedded information, X1 represents gemcitabine and X2 represents cytarabine  
1105 information.  
1106

1107 **Additional File 7. GO term-specific heatmaps for REMc/GTF-enriched modules.** GO  
1108 term-specific heatmaps for significant GO process terms were generated as described in  
1109 methods and **Figure 3**. Any related child terms are presented in subsequent pages of  
1110 the parent file name. GO terms with more than 100 children, with 2 or fewer genes  
1111 annotated to the term, or a file size over 400KB are not shown. All heatmaps are  
1112 generated with the same layout (see **Fig. 3**).

1113

1114 **Additional File 8. Application of yeast phenomic drug-gene interaction data to**  
1115 **predict, from cancer cell line pharmacogenomic data (gene expression and drug**  
1116 **sensitivity correlations), human genes that modify gemcitabine or cytarabine**  
1117 **toxicity. (A)** Tables of UES and OES human genes and whether their yeast homologs  
1118 were found to be deletion enhancing or deletion suppressing, respectively. **(B-D)** REMc  
1119 heatmaps and tables of the yeast interaction scores corresponding to UES or OES  
1120 human genes identified **(B)** across all tissue, **(C)** in lung, or **(D)** in hematopoietic and  
1121 lymphoid tissue. See **Fig. 3** for description of tables and the color keys (note: a teal  
1122 color, which represents cytarabine-specific UES/OES in the heatmaps in the main  
1123 manuscript figures, is represented as darker blue in the supplemental heatmaps, while  
1124 gold, representing gemcitabine-specific UES/OES in the main manuscript, is  
1125 represented as a brighter yellow in the supplemental heatmaps).

1126

1127 **List of abbreviations and glossary of terms**

1128 **AraC** – cytarabine; cytosine arabinoside

1129 **CPPs** – Cell proliferation parameters: parameters of the logistic growth equation used to  
1130 fit cell proliferation data obtained by Q-HTCP. The CPPs used to assess gene  
1131 interaction in this study were K (carrying capacity) and L (time required to reach half of  
1132 carrying capacity) [7-9,38].

1133 **DAmP** – Decreased Abundance of mRNA Production: refers to a method of making  
1134 YKD alleles, where the 3' UTR of essential genes is disrupted, reducing mRNA stability  
1135 and gene dosage [291].  
1136 **dCK** – deoxycytidine kinase  
1137 **dCMP** – deoxycytidine monophosphate  
1138 **DE** – Deletion enhancer: gene loss of function (knockout or knockdown) that results in  
1139 enhancement / increase of drug sensitivity [9].  
1140 **dFdC** - 2',2'-difluoro 2'-deoxycytidine, gemcitabine  
1141 **dNTP** – deoxyribonucleotide triphosphate  
1142 **DS** – Deletion suppressor: gene loss of function (knockout or knockdown) that results in  
1143 suppression / reduction of drug sensitivity [9].  
1144 **ESCRT** – endosomal sorting complex required for transport  
1145 **GARP complex** - Golgi-associated retrograde protein complex.  
1146 **gCSI** – The Genentech Cell Line Screening Initiative: One of two pharmacogenomics  
1147 datasets used in this study (<https://pharmacodb.pmgenomics.ca/datasets/4>).  
1148 **GDSC1000** - Genomics of Drug Sensitivity in Cancer: One of two pharmacogenomics  
1149 datasets used in this study (<https://pharmacodb.pmgenomics.ca/datasets/5>)  
1150 **GO** – Gene ontology  
1151 **GTF** – Gene ontology term finder: an algorithm to assess GO term enrichment amongst  
1152 a list of genes; applied to REMc (clustering) results [41].  
1153 **GTA** – Gene ontology term averaging: an assessment of GO term function obtained by  
1154 averaging the gene interaction values for all genes of a GO term  
1155 **GTA value** – Gene ontology term average value  
1156 **gtaSD** – standard deviation of GTA value  
1157 **GTA score** – (GTA value - gtaSD)  
1158 **HaL** – hematopoietic & lymphoid tissue



1159 **HDAC** – Histone deacetylase complex  
1160 **HLD** – Human-like media with dextrose [8]: the yeast media used in this study.  
1161 **INT** – Interaction score  
1162 **NDK** – nucleoside diphosphate kinase  
1163 **OES** – Overexpression sensitivity: refers to association of increased gene expression  
1164 with drug sensitivity in pharmacogenomics data [33].  
1165 **PharmacoDB** – The resource used for cancer pharmacogenomics analysis [33].  
1166 **PPOD** – Princeton protein orthology database  
1167 **Q-HTCP** – Quantitative high throughput cell array phenotyping: a method of imaging,  
1168 image analysis, and growth curve fitting to obtain cell proliferation parameters [7,38].  
1169 **Ref** – Reference: the genetic background from which the YKO/KD library was derived  
1170 **REMc** – Recursive expectation maximization clustering: a probabilistic clustering  
1171 algorithm that determines a discrete number of clusters from a data matrix [40].  
1172 **RNR** – ribonucleotide reductase  
1173 **SD** – Standard deviation  
1174 **SGA** – Synthetic genetic array  
1175 **SGD** – Saccharomyces genome database  
1176 **UES** – Underexpression sensitivity: refers to association of reduced gene expression  
1177 with drug sensitivity in pharmacogenomics data [33].  
1178 **YKO** – Yeast knockout  
1179 **YKD** - Yeast knockdown: DAmP alleles  
1180 **YKO/KD** – Yeast knockout or knockdown

1181

#### 1182 **Acknowledgements:**

1183 The authors thank the following funding agencies for their support: American Cancer  
1184 Society (RSG-10-066-01-TBE), Howard Hughes Medical Institute (P/S ECA 57005927),

1185 NIH/NCI (P30 CA013148), NIH/NIA (R01 AG043076), and Cystic Fibrosis Foundation  
1186 (HARTMA16G0). The authors also thank Amanda Stisher for assistance with  
1187 constructing yDW1 and Bo Xu and William Parker for providing the deoxycytidine kinase  
1188 cDNA cloned into a plasmid.

1189

1190 **Author Contributions:**

1191 Conceptualization, J.L.H.; Methodology and Software, B.A.M., J.G., J.L.H., and S.M.S.;  
1192 Formal Analysis, J.L.H and S.M.S.; Investigation, D.W., I.P., and M.I.; Resources, J.L.H.  
1193 and M.N.; Data Curation, J.W.R.; Writing – Original Draft Preparation, J.L.H and S.M.S.;  
1194 Writing, Review & Editing, J.L.H and S.M.S.

1195

1196 **Conflicts of Interest:**

1197 JLH has ownership in Spectrum PhenomX, LLC, a shell company that was formed to  
1198 commercialize Q-HTCP technology. The authors declare no other competing interests.

1199

1200 **References:**

1201

Reference List

1202

- 1203 1. Torti, D.; Trusolino, L. Oncogene addiction as a foundational rationale for  
1204 targeted anti-cancer therapy: promises and perils. *EMBO Mol Med* **2011**, *3*,  
1205 623-636, doi:10.1002/emmm.201100176.
- 1206 2. Masui, K.; Gini, B.; Wykosky, J.; Zanca, C.; Mischel, P.S.; Furnari, F.B.; Cavenee,  
1207 W.K. A tale of two approaches: complementary mechanisms of cytotoxic and  
1208 targeted therapy resistance may inform next-generation cancer treatments.  
1209 *Carcinogenesis* **2013**, *34*, 725-738, doi:10.1093/carcin/bgt086.
- 1210 3. Hartwell, L.H.; Szankasi, P.; Roberts, C.J.; Murray, A.W.; Friend, S.H.  
1211 Integrating genetic approaches into the discovery of anticancer drugs.  
1212 *Science* **1997**, *278*, 1064-1068, doi:10.1126/science.278.5340.1064.
- 1213 4. Srivas, R.; Shen, J.P.; Yang, C.C.; Sun, S.M.; Li, J.; Gross, A.M.; Jensen, J.; Licon, K.;  
1214 Bojorquez-Gomez, A.; Klepper, K., et al. A Network of Conserved Synthetic  
1215 Lethal Interactions for Exploration of Precision Cancer Therapy. *Mol Cell*  
1216 **2016**, *63*, 514-525, doi:10.1016/j.molcel.2016.06.022.

- 1217 5. Hartman IV, J.L.; Garvik, B.; Hartwell, L. Principles for the buffering of genetic  
1218 variation. *Science* **2001**, *291*, 1001-1004.
- 1219 6. Hartman IV, J.L.; Tippery, N.P. Systematic quantification of gene interactions  
1220 by phenotypic array analysis. *Genome Biol* **2004**, *5*, R49.
- 1221 7. Shah, N.A.; Laws, R.J.; Wardman, B.; Zhao, L.P.; Hartman IV, J.L. Accurate,  
1222 precise modeling of cell proliferation kinetics from time-lapse imaging and  
1223 automated image analysis of agar yeast culture arrays. *BMC Syst Biol* **2007**, *1*,  
1224 3.
- 1225 8. Hartman IV, J.L.; Stisher, C.; Outlaw, D.A.; Guo, J.; Shah, N.A.; Tian, D.; Santos,  
1226 S.M.; Rodgers, J.W.; White, R.A. Yeast Phenomics: An Experimental Approach  
1227 for Modeling Gene Interaction Networks that Buffer Disease. *Genes* **2015**, *6*,  
1228 24-45, doi:10.3390/genes6010024.
- 1229 9. Louie, R.J.; Guo, J.; Rodgers, J.W.; White, R.; Shah, N.; Pagant, S.; Kim, P.;  
1230 Livstone, M.; Dolinski, K.; McKinney, B.A., et al. A yeast phenomic model for  
1231 the gene interaction network modulating CFTR- $\Delta$ F508 protein biogenesis.  
1232 *Genome Med* **2012**, *4*, 103, doi:10.1186/gm404.
- 1233 10. Galmarini, C.M.; Mackey, J.R.; Dumontet, C. Nucleoside analogues and  
1234 nucleobases in cancer treatment. *Lancet Oncol* **2002**, *3*, 415-424.
- 1235 11. Parker, W.B. Enzymology of purine and pyrimidine antimetabolites used in  
1236 the treatment of cancer. *Chem Rev* **2009**, *109*, 2880-2893.
- 1237 12. de Sousa Cavalcante, L.; Monteiro, G. Gemcitabine: metabolism and molecular  
1238 mechanisms of action, sensitivity and chemoresistance in pancreatic cancer.  
1239 *Eur J Pharmacol* **2014**, *741*, 8-16, doi:10.1016/j.ejphar.2014.07.041.
- 1240 13. Hayashi, H.; Kurata, T.; Nakagawa, K. Gemcitabine: efficacy in the treatment  
1241 of advanced stage nonsquamous non-small cell lung cancer. *Clin Med Insights*  
1242 *Oncol* **2011**, *5*, 177-184, doi:10.4137/CMO.S6252.
- 1243 14. Raja, F.A.; Counsell, N.; Colombo, N.; Pfisterer, J.; du Bois, A.; Parmar, M.K.;  
1244 Vergote, I.B.; Gonzalez-Martin, A.; Alberts, D.S.; Plante, M., et al. Platinum  
1245 versus platinum-combination chemotherapy in platinum-sensitive recurrent  
1246 ovarian cancer: a meta-analysis using individual patient data. *Ann Oncol*  
1247 **2013**, *24*, 3028-3034, doi:10.1093/annonc/mdt406.
- 1248 15. Alli, E.; Sharma, V.B.; Hartman, A.R.; Lin, P.S.; McPherson, L.; Ford, J.M.  
1249 Enhanced sensitivity to cisplatin and gemcitabine in Brca1-deficient murine  
1250 mammary epithelial cells. *BMC Pharmacol* **2011**, *11*, 7, doi:10.1186/1471-  
1251 2210-11-7.
- 1252 16. Reese, N.D.; Schiller, G.J. High-dose cytarabine (HD araC) in the treatment of  
1253 leukemias: a review. *Curr Hematol Malig Rep* **2013**, *8*, 141-148,  
1254 doi:10.1007/s11899-013-0156-3.
- 1255 17. Giovannetti, E.; Del Tacca, M.; Mey, V.; Funel, N.; Nannizzi, S.; Ricci, S.;  
1256 Orlandini, C.; Boggi, U.; Campani, D.; Del Chiaro, M., et al. Transcription  
1257 analysis of human equilibrative nucleoside transporter-1 predicts survival in  
1258 pancreas cancer patients treated with gemcitabine. *Cancer Res* **2006**, *66*,  
1259 3928-3935, doi:10.1158/0008-5472.CAN-05-4203.
- 1260 18. Skrypek, N.; Duchene, B.; Hebbar, M.; Leteurtre, E.; van Seuninghen, I.;  
1261 Jonckheere, N. The MUC4 mucin mediates gemcitabine resistance of human

- 1262 pancreatic cancer cells via the Concentrative Nucleoside Transporter family.  
1263 *Oncogene* **2013**, *32*, 1714-1723, doi:10.1038/onc.2012.179.
- 1264 19. Song, J.H.; Kim, S.H.; Kweon, S.H.; Lee, T.H.; Kim, H.J.; Kim, H.J.; Kim, T.S.  
1265 Defective expression of deoxycytidine kinase in cytarabine-resistant acute  
1266 myeloid leukemia cells. *Int J Oncol* **2009**, *34*, 1165-1171.
- 1267 20. Duxbury, M.S.; Ito, H.; Zinner, M.J.; Ashley, S.W.; Whang, E.E. RNA interference  
1268 targeting the M2 subunit of ribonucleotide reductase enhances pancreatic  
1269 adenocarcinoma chemosensitivity to gemcitabine. *Oncogene* **2004**, *23*, 1539-  
1270 1548, doi:10.1038/sj.onc.1207272.
- 1271 21. Davidson, J.D.; Ma, L.; Flagella, M.; Geeganage, S.; Gelbert, L.M.; Slapak, C.A. An  
1272 increase in the expression of ribonucleotide reductase large subunit 1 is  
1273 associated with gemcitabine resistance in non-small cell lung cancer cell  
1274 lines. *Cancer Res* **2004**, *64*, 3761-3766, doi:10.1158/0008-5472.CAN-03-  
1275 3363.
- 1276 22. Li, L.; Fridley, B.L.; Kalari, K.; Jenkins, G.; Batzler, A.; Weinshilboum, R.M.;  
1277 Wang, L. Gemcitabine and arabinosylcytosin pharmacogenomics: genome-  
1278 wide association and drug response biomarkers. *PLoS One* **2009**, *4*, e7765,  
1279 doi:10.1371/journal.pone.0007765.
- 1280 23. Innocenti, F.; Owzar, K.; Cox, N.L.; Evans, P.; Kubo, M.; Zembutsu, H.; Jiang, C.;  
1281 Hollis, D.; Mushiroda, T.; Li, L., et al. A genome-wide association study of  
1282 overall survival in pancreatic cancer patients treated with gemcitabine in  
1283 CALGB 80303. *Clin Cancer Res* **2012**, *18*, 577-584, doi:10.1158/1078-  
1284 0432.CCR-11-1387.
- 1285 24. You, L.; Chang, D.; Du, H.Z.; Zhao, Y.P. Genome-wide screen identifies PVT1 as  
1286 a regulator of Gemcitabine sensitivity in human pancreatic cancer cells.  
1287 *Biochem Biophys Res Commun* **2011**, *407*, 1-6,  
1288 doi:10.1016/j.bbrc.2011.02.027.
- 1289 25. Bargal, S.A.; Rafiee, R.; Crews, K.R.; Wu, H.; Cao, X.; Rubnitz, J.E.; Ribeiro, R.C.;  
1290 Downing, J.R.; Pounds, S.B.; Lamba, J.K. Genome-wide association analysis  
1291 identifies SNPs predictive of in vitro leukemic cell sensitivity to cytarabine in  
1292 pediatric AML. *Oncotarget* **2018**, *9*, 34859-34875,  
1293 doi:10.18632/oncotarget.26163.
- 1294 26. Gamazon, E.R.; Lamba, J.K.; Pounds, S.; Stark, A.L.; Wheeler, H.E.; Cao, X.; Im,  
1295 H.K.; Mitra, A.K.; Rubnitz, J.E.; Ribeiro, R.C., et al. Comprehensive genetic  
1296 analysis of cytarabine sensitivity in a cell-based model identifies  
1297 polymorphisms associated with outcome in AML patients. *Blood* **2013**, *121*,  
1298 4366-4376, doi:10.1182/blood-2012-10-464149.
- 1299 27. Giaeffer, G.; Chu, A.M.; Ni, L.; Connelly, C.; Riles, L.; Veronneau, S.; Dow, S.;  
1300 Lucau-Danila, A.; Anderson, K.; Andre, B., et al. Functional profiling of the  
1301 *Saccharomyces cerevisiae* genome. *Nature* **2002**, *418*, 387-391,  
1302 doi:10.1038/nature00935.
- 1303 28. Tong, A.H.; Boone, C. Synthetic genetic array analysis in *Saccharomyces*  
1304 *cerevisiae*. *Methods Mol Biol* **2006**, *313*, 171-192.
- 1305 29. Singh, I.; Pass, R.; Togay, S.O.; Rodgers, J.W.; Hartman IV, J.L. Stringent Mating-  
1306 Type-Regulated Auxotrophy Increases the Accuracy of Systematic Genetic

- 1307 Interaction Screens with *Saccharomyces cerevisiae* Mutant Arrays. *Genetics*  
1308 **2009**, *181*, 289-300.
- 1309 30. Louie, R.J.; Guo, J.; Rodgers, J.W.; White, R.; Shah, N.; Pagant, S.; Kim, P.;  
1310 Livstone, M.; Dolinski, K.; McKinney, B.A., et al. A yeast phenomic model for  
1311 the gene interaction network modulating CFTR-DeltaF508 protein  
1312 biogenesis. *Genome Med* **2012**, *4*, 103, doi:10.1186/gm404.
- 1313 31. Yang, W.; Soares, J.; Greninger, P.; Edelman, E.J.; Lightfoot, H.; Forbes, S.;  
1314 Bindal, N.; Beare, D.; Smith, J.A.; Thompson, I.R., et al. Genomics of Drug  
1315 Sensitivity in Cancer (GDSC): a resource for therapeutic biomarker discovery  
1316 in cancer cells. *Nucleic Acids Res* **2013**, *41*, D955-961,  
1317 doi:10.1093/nar/gks1111.
- 1318 32. Klijn, C.; Durinck, S.; Stawiski, E.W.; Haverty, P.M.; Jiang, Z.; Liu, H.;  
1319 Degenhardt, J.; Mayba, O.; Gnad, F.; Liu, J., et al. A comprehensive  
1320 transcriptional portrait of human cancer cell lines. *Nat Biotechnol* **2015**, *33*,  
1321 306-312, doi:10.1038/nbt.3080.
- 1322 33. Smirnov, P.; Kofia, V.; Maru, A.; Freeman, M.; Ho, C.; El-Hachem, N.; Adam,  
1323 G.A.; Ba-Alawi, W.; Safikhani, Z.; Haibe-Kains, B. PharmacoDB: an integrative  
1324 database for mining in vitro anticancer drug screening studies. *Nucleic Acids*  
1325 *Res* **2018**, *46*, D994-D1002, doi:10.1093/nar/gkx911.
- 1326 34. Hartman IV, J.L. Buffering of deoxyribonucleotide pool homeostasis by  
1327 threonine metabolism. *Proceedings of the National Academy of Sciences of the*  
1328 *United States of America* **2007**, *104*, 11700-11705,  
1329 doi:10.1073/pnas.0705212104.
- 1330 35. Belli, G.; Gari, E.; Piedrafita, L.; Aldea, M.; Herrero, E. An activator/repressor  
1331 dual system allows tight tetracycline-regulated gene expression in budding  
1332 yeast. *Nucleic Acids Res* **1998**, *26*, 942-947, doi:10.1093/nar/26.4.942.
- 1333 36. William, D. Charakterisierung der C terminalen Domäne von Mycobacterium  
1334 tuberculosis protein A. Friedrich-Alexander-Universität Erlangen-Nürnberg,  
1335 Erlangen, Germany, 2012.
- 1336 37. Goldstein, A.L.; McCusker, J.H. Three new dominant drug resistance cassettes  
1337 for gene disruption in *Saccharomyces cerevisiae*. *Yeast* **1999**, *15*, 1541-1553,  
1338 doi:10.1002/(SICI)1097-0061(199910)15:14<1541::AID-YEA476>3.0.CO;2-  
1339 K.
- 1340 38. Rodgers, J.; Guo, J.; Hartman IV, J.L. Phenomic assessment of genetic buffering  
1341 by kinetic analysis of cell arrays. *Methods Mol Biol* **2014**, *1205*, 187-208,  
1342 doi:10.1007/978-1-4939-1363-3\_12.
- 1343 39. Santos, S.M.; Hartman IV, J.L. A yeast phenomic model for the influence of  
1344 Warburg metabolism on genetic buffering of doxorubicin. *bioRxiv* **2019**,  
1345 10.1101/517490, 517490, doi:10.1101/517490.
- 1346 40. Guo, J.; Tian, D.; McKinney, B.A.; Hartman IV, J.L. Recursive expectation-  
1347 maximization clustering: a method for identifying buffering mechanisms  
1348 composed of phenomic modules. *Chaos* **2010**, *20*, 026103,  
1349 doi:10.1063/1.3455188.
- 1350 41. Boyle, E.I.; Weng, S.; Gollub, J.; Jin, H.; Botstein, D.; Cherry, J.M.; Sherlock, G.  
1351 GO::TermFinder--open source software for accessing Gene Ontology  
1352 information and finding significantly enriched Gene Ontology terms

- 1353 associated with a list of genes. *Bioinformatics* **2004**, *20*, 3710-3715,  
1354 doi:10.1093/bioinformatics/bth456.
- 1355 42. Cherry, J.M.; Hong, E.L.; Amundsen, C.; Balakrishnan, R.; Binkley, G.; Chan,  
1356 E.T.; Christie, K.R.; Costanzo, M.C.; Dwight, S.S.; Engel, S.R., et al.  
1357 *Saccharomyces* Genome Database: the genomics resource of budding yeast.  
1358 *Nucleic Acids Res* **2012**, *40*, D700-705, doi:10.1093/nar/gkr1029.
- 1359 43. Smirnov, P.; Safikhani, Z.; El-Hachem, N.; Wang, D.; She, A.; Olsen, C.; Freeman,  
1360 M.; Selby, H.; Gendoo, D.M.; Grossmann, P., et al. PharmacGx: an R package  
1361 for analysis of large pharmacogenomic datasets. *Bioinformatics* **2016**, *32*,  
1362 1244-1246, doi:10.1093/bioinformatics/btv723.
- 1363 44. Durinck, S.; Moreau, Y.; Kasprzyk, A.; Davis, S.; De Moor, B.; Brazma, A.;  
1364 Huber, W. BioMart and Bioconductor: a powerful link between biological  
1365 databases and microarray data analysis. *Bioinformatics* **2005**, *21*, 3439-3440,  
1366 doi:10.1093/bioinformatics/bti525.
- 1367 45. Durinck, S.; Spellman, P.T.; Birney, E.; Huber, W. Mapping identifiers for the  
1368 integration of genomic datasets with the R/Bioconductor package biomart.  
1369 *Nat Protoc* **2009**, *4*, 1184-1191, doi:10.1038/nprot.2009.97.
- 1370 46. Zerbino, D.R.; Achuthan, P.; Akanni, W.; Amode, M.R.; Barrell, D.; Bhai, J.;  
1371 Billis, K.; Cummins, C.; Gall, A.; Giron, C.G., et al. Ensembl 2018. *Nucleic Acids*  
1372 *Res* **2018**, *46*, D754-D761, doi:10.1093/nar/gkx1098.
- 1373 47. Heinicke, S.; Livstone, M.S.; Lu, C.; Oughtred, R.; Kang, F.; Angiuoli, S.V.; White,  
1374 O.; Botstein, D.; Dolinski, K. The Princeton Protein Orthology Database (P-  
1375 POD): a comparative genomics analysis tool for biologists. *PLoS ONE* **2007**, *2*,  
1376 e766.
- 1377 48. Tong, A.H.; Evangelista, M.; Parsons, A.B.; Xu, H.; Bader, G.D.; Page, N.;  
1378 Robinson, M.; Raghbizadeh, S.; Hogue, C.W.; Bussey, H., et al. Systematic  
1379 genetic analysis with ordered arrays of yeast deletion mutants. *Science* **2001**,  
1380 *294*, 2364-2368, doi:10.1126/science.1065810.
- 1381 49. Garnett, M.J.; Edelman, E.J.; Heidorn, S.J.; Greenman, C.D.; Dastur, A.; Lau,  
1382 K.W.; Greninger, P.; Thompson, I.R.; Luo, X.; Soares, J., et al. Systematic  
1383 identification of genomic markers of drug sensitivity in cancer cells. *Nature*  
1384 **2012**, *483*, 570-575, doi:10.1038/nature11005.
- 1385 50. Haverty, P.M.; Lin, E.; Tan, J.; Yu, Y.; Lam, B.; Lianoglou, S.; Neve, R.M.; Martin,  
1386 S.; Settleman, J.; Yauch, R.L., et al. Reproducible pharmacogenomic profiling of  
1387 cancer cell line panels. *Nature* **2016**, *533*, 333-337,  
1388 doi:10.1038/nature17987.
- 1389 51. Hartwell, L.H.; Hopfield, J.J.; Leibler, S.; Murray, A.W. From molecular to  
1390 modular cell biology. *Nature* **1999**, *402*, C47-52, doi:10.1038/35011540.
- 1391 52. Birrell, G.W.; Brown, J.A.; Wu, H.I.; Giaever, G.; Chu, A.M.; Davis, R.W.; Brown,  
1392 J.M. Transcriptional response of *Saccharomyces cerevisiae* to DNA-damaging  
1393 agents does not identify the genes that protect against these agents. *Proc Natl*  
1394 *Acad Sci U S A* **2002**, *99*, 8778-8783.
- 1395 53. O'Neil, N.J.; Bailey, M.L.; Hieter, P. Synthetic lethality and cancer. *Nat Rev*  
1396 *Genet* **2017**, *18*, 613-623, doi:10.1038/nrg.2017.47.
- 1397 54. McGary, K.L.; Park, T.J.; Woods, J.O.; Cha, H.J.; Wallingford, J.B.; Marcotte, E.M.  
1398 Systematic discovery of nonobvious human disease models through

- 1399 orthologous phenotypes. *Proc Natl Acad Sci U S A* **2010**, *107*, 6544-6549,  
1400 doi:0910200107 [pii]  
1401 10.1073/pnas.0910200107.
- 1402 55. Shen, J.P.; Ideker, T. Synthetic Lethal Networks for Precision Oncology:  
1403 Promises and Pitfalls. *J Mol Biol* **2018**, *430*, 2900-2912,  
1404 doi:10.1016/j.jmb.2018.06.026.
- 1405 56. Shaheen, M.; Allen, C.; Nickoloff, J.A.; Hromas, R. Synthetic lethality: exploiting  
1406 the addiction of cancer to DNA repair. *Blood* **2011**, *117*, 6074-6082,  
1407 doi:10.1182/blood-2011-01-313734.
- 1408 57. Shin, S.H.; Bode, A.M.; Dong, Z. Precision medicine: the foundation of future  
1409 cancer therapeutics. *NPJ Precis Oncol* **2017**, *1*, 12, doi:10.1038/s41698-017-  
1410 0016-z.
- 1411 58. Shimomura, I.; Yamamoto, Y.; Ochiya, T. Synthetic Lethality in Lung Cancer-  
1412 From the Perspective of Cancer Genomics. *Medicines (Basel)* **2019**, *6*,  
1413 doi:10.3390/medicines6010038.
- 1414 59. Chang, M.; Bellaoui, M.; Zhang, C.; Desai, R.; Morozov, P.; Delgado-Cruzata, L.;  
1415 Rothstein, R.; Freyer, G.A.; Boone, C.; Brown, G.W. RMI1/NCE4, a suppressor  
1416 of genome instability, encodes a member of the RecQ helicase/Topo III  
1417 complex. *The EMBO journal* **2005**, *24*, 2024-2033,  
1418 doi:10.1038/sj.emboj.7600684.
- 1419 60. Cejka, P.; Plank, J.L.; Dombrowski, C.C.; Kowalczykowski, S.C. Decatenation of  
1420 DNA by the *S. cerevisiae* Sgs1-Top3-Rmi1 and RPA complex: a mechanism for  
1421 disentangling chromosomes. *Molecular cell* **2012**, *47*, 886-896,  
1422 doi:10.1016/j.molcel.2012.06.032.
- 1423 61. Nagai, H.; Yabe, A.; Mine, N.; Mikami, I.; Fujiwara, H.; Terada, Y.; Hirano, A.;  
1424 Tsuneizumi, M.; Yokota, T.; Emi, M. Down-regulation in human cancers of  
1425 DRHC, a novel helicase-like gene from 17q25.1 that inhibits cell growth.  
1426 *Cancer Lett* **2003**, *193*, 41-47.
- 1427 62. Hamamoto, R.; Furukawa, Y.; Morita, M.; Iimura, Y.; Silva, F.P.; Li, M.; Yagy, Y.,  
1428 Nakamura, Y. SMYD3 encodes a histone methyltransferase involved in the  
1429 proliferation of cancer cells. *Nat Cell Biol* **2004**, *6*, 731-740,  
1430 doi:10.1038/ncb1151.
- 1431 63. Hasgall, P.A.; Hoogewijs, D.; Faza, M.B.; Panse, V.G.; Wenger, R.H.; Camenisch,  
1432 G. The putative RNA helicase HELZ promotes cell proliferation, translation  
1433 initiation and ribosomal protein S6 phosphorylation. *PLoS One* **2011**, *6*,  
1434 e22107, doi:10.1371/journal.pone.0022107.
- 1435 64. Schepeler, T.; Holm, A.; Halvey, P.; Nordentoft, I.; Lamy, P.; Riising, E.M.;  
1436 Christensen, L.L.; Thorsen, K.; Liebler, D.C.; Helin, K., et al. Attenuation of the  
1437 beta-catenin/TCF4 complex in colorectal cancer cells induces several  
1438 growth-suppressive microRNAs that target cancer promoting genes.  
1439 *Oncogene* **2012**, *31*, 2750-2760, doi:10.1038/onc.2011.453.
- 1440 65. Li, L.; Geng, Y.; Feng, R.; Zhu, Q.; Miao, B.; Cao, J.; Fei, S. The Human RNA  
1441 Surveillance Factor UPF1 Modulates Gastric Cancer Progression by Targeting  
1442 Long Non-Coding RNA MALAT1. *Cell Physiol Biochem* **2017**, *42*, 2194-2206,  
1443 doi:10.1159/000479994.

- 1444 66. Chang, L.; Li, C.; Guo, T.; Wang, H.; Ma, W.; Yuan, Y.; Liu, Q.; Ye, Q.; Liu, Z. The  
1445 human RNA surveillance factor UPF1 regulates tumorigenesis by targeting  
1446 Smad7 in hepatocellular carcinoma. *J Exp Clin Cancer Res* **2016**, *35*, 8,  
1447 doi:10.1186/s13046-016-0286-2.
- 1448 67. Liu, C.; Karam, R.; Zhou, Y.; Su, F.; Ji, Y.; Li, G.; Xu, G.; Lu, L.; Wang, C.; Song, M.,  
1449 et al. The UPF1 RNA surveillance gene is commonly mutated in pancreatic  
1450 adenosquamous carcinoma. *Nat Med* **2014**, *20*, 596-598,  
1451 doi:10.1038/nm.3548.
- 1452 68. Chen, M.B.; Liu, Y.Y.; Cheng, L.B.; Lu, J.W.; Zeng, P.; Lu, P.H. AMPKalpha  
1453 phosphatase Ppm1E upregulation in human gastric cancer is required for cell  
1454 proliferation. *Oncotarget* **2017**, *8*, 31288-31296,  
1455 doi:10.18632/oncotarget.16126.
- 1456 69. Thean, L.F.; Loi, C.; Ho, K.S.; Koh, P.K.; Eu, K.W.; Cheah, P.Y. Genome-wide scan  
1457 identifies a copy number variable region at 3q26 that regulates PPM1L in  
1458 APC mutation-negative familial colorectal cancer patients. *Genes  
1459 Chromosomes Cancer* **2010**, *49*, 99-106, doi:10.1002/gcc.20724.
- 1460 70. Kondo, T.; Matsumoto, K.; Sugimoto, K. Role of a complex containing Rad17,  
1461 Mec3, and Ddc1 in the yeast DNA damage checkpoint pathway. *Molecular and  
1462 cellular biology* **1999**, *19*, 1136-1143.
- 1463 71. Paciotti, V.; Lucchini, G.; Plevani, P.; Longhese, M.P. Mec1p is essential for  
1464 phosphorylation of the yeast DNA damage checkpoint protein Ddc1p, which  
1465 physically interacts with Mec3p. *The EMBO journal* **1998**, *17*, 4199-4209,  
1466 doi:10.1093/emboj/17.14.4199.
- 1467 72. Majka, J.; Burgers, P.M. Yeast Rad17/Mec3/Ddc1: a sliding clamp for the DNA  
1468 damage checkpoint. *Proceedings of the National Academy of Sciences of the  
1469 United States of America* **2003**, *100*, 2249-2254,  
1470 doi:10.1073/pnas.0437148100.
- 1471 73. Navadgi-Patil, V.M.; Burgers, P.M. The unstructured C-terminal tail of the 9-1-  
1472 1 clamp subunit Ddc1 activates Mec1/ATR via two distinct mechanisms.  
1473 *Molecular cell* **2009**, *36*, 743-753, doi:10.1016/j.molcel.2009.10.014.
- 1474 74. Fredebohm, J.; Wolf, J.; Hoheisel, J.D.; Boettcher, M. Depletion of RAD17  
1475 sensitizes pancreatic cancer cells to gemcitabine. *Journal of cell science* **2013**,  
1476 *126*, 3380-3389, doi:10.1242/jcs.124768.
- 1477 75. Saponaro, M.; Kantidakis, T.; Mitter, R.; Kelly, G.P.; Heron, M.; Williams, H.;  
1478 Soding, J.; Stewart, A.; Svejstrup, J.Q. RECQL5 controls transcript elongation  
1479 and suppresses genome instability associated with transcription stress. *Cell*  
1480 **2014**, *157*, 1037-1049, doi:10.1016/j.cell.2014.03.048.
- 1481 76. Hu, Y.; Raynard, S.; Sehorn, M.G.; Lu, X.; Bussen, W.; Zheng, L.; Stark, J.M.;  
1482 Barnes, E.L.; Chi, P.; Janscak, P., et al. RECQL5/Recql5 helicase regulates  
1483 homologous recombination and suppresses tumor formation via disruption  
1484 of Rad51 presynaptic filaments. *Genes & development* **2007**, *21*, 3073-3084,  
1485 doi:10.1101/gad.1609107.
- 1486 77. Liu, S.; Bachran, C.; Gupta, P.; Miller-Randolph, S.; Wang, H.; Crown, D.; Zhang,  
1487 Y.; Wein, A.N.; Singh, R.; Fattah, R., et al. Diphthamide modification on  
1488 eukaryotic elongation factor 2 is needed to assure fidelity of mRNA



- 1489 translation and mouse development. *Proc Natl Acad Sci U S A* **2012**, *109*,  
1490 13817-13822, doi:10.1073/pnas.1206933109.
- 1491 78. Villahermosa, D.; Fleck, O. Elp3 and Dph3 of *Schizosaccharomyces pombe*  
1492 mediate cellular stress responses through tRNA(Lys)UUU modifications. *Sci*  
1493 *Rep* **2017**, *7*, 7225, doi:10.1038/s41598-017-07647-1.
- 1494 79. Denisova, E.; Heidenreich, B.; Nagore, E.; Rachakonda, P.S.; Hosen, I.; Akrap, I.;  
1495 Traves, V.; Garcia-Casado, Z.; Lopez-Guerrero, J.A.; Requena, C., et al. Frequent  
1496 DPH3 promoter mutations in skin cancers. *Oncotarget* **2015**, *6*, 35922-  
1497 35930, doi:10.18632/oncotarget.5771.
- 1498 80. Abiatari, I.; Gillen, S.; DeOliveira, T.; Klose, T.; Bo, K.; Giese, N.A.; Friess, H.;  
1499 Kleeff, J. The microtubule-associated protein MAPRE2 is involved in  
1500 perineural invasion of pancreatic cancer cells. *Int J Oncol* **2009**, *35*, 1111-  
1501 1116.
- 1502 81. Kim, Y.R.; Kim, H.S.; An, C.H.; Kim, S.S.; Yoo, N.J.; Lee, S.H. Frameshift mutation  
1503 of MAPRE3, a microtubule-related gene, in gastric and colorectal cancers  
1504 with microsatellite instability. *Pathology* **2010**, *42*, 493-496,  
1505 doi:10.3109/00313025.2010.494285.
- 1506 82. Shah, M.A.; Denton, E.L.; Arrowsmith, C.H.; Lupien, M.; Schapira, M. A global  
1507 assessment of cancer genomic alterations in epigenetic mechanisms.  
1508 *Epigenetics Chromatin* **2014**, *7*, 29, doi:10.1186/1756-8935-7-29.
- 1509 83. Harsay, E.; Schekman, R. Avl9p, a member of a novel protein superfamily,  
1510 functions in the late secretory pathway. *Mol Biol Cell* **2007**, *18*, 1203-1219,  
1511 doi:10.1091/mbc.e06-11-1035.
- 1512 84. Li, Y.; Xu, J.; Xiong, H.; Ma, Z.; Wang, Z.; Kipreos, E.T.; Dalton, S.; Zhao, S.  
1513 Cancer driver candidate genes AVL9, DENND5A and NUPL1 contribute to  
1514 MDCK cystogenesis. *Oncoscience* **2014**, *1*, 854-865.
- 1515 85. Zhang, W.; Wang, J.; Chai, R.; Zhong, G.; Zhang, C.; Cao, W.; Yan, L.; Zhang, X.;  
1516 Xu, Z. Hypoxia-regulated lncRNA CRPAT4 promotes cell migration via  
1517 regulating AVL9 in clear cell renal cell carcinomas. *Onco Targets Ther* **2018**,  
1518 *11*, 4537-4545, doi:10.2147/OTT.S169155.
- 1519 86. Zhang, D.; Zhang, P.; Yang, P.; He, Y.; Wang, X.; Yang, Y.; Zhu, H.; Xu, N.; Liang,  
1520 S. Downregulation of ATP1A1 promotes cancer development in renal cell  
1521 carcinoma. *Clin Proteomics* **2017**, *14*, 15, doi:10.1186/s12014-017-9150-4.
- 1522 87. Bogdanov, A.; Moiseenko, F.; Dubina, M. Abnormal expression of ATP1A1 and  
1523 ATP1A2 in breast cancer. *F1000Res* **2017**, *6*, 10,  
1524 doi:10.12688/f1000research.10481.1.
- 1525 88. Cialfi, S.; Le Pera, L.; De Blasio, C.; Mariano, G.; Palermo, R.; Zonfrilli, A.;  
1526 Uccelletti, D.; Palleschi, C.; Biolcati, G.; Barbieri, L., et al. The loss of ATP2C1  
1527 impairs the DNA damage response and induces altered skin homeostasis:  
1528 Consequences for epidermal biology in Hailey-Hailey disease. *Sci Rep* **2016**,  
1529 *6*, 31567, doi:10.1038/srep31567.
- 1530 89. Okunade, G.W.; Miller, M.L.; Azhar, M.; Andringa, A.; Sanford, L.P.;  
1531 Doetschman, T.; Prasad, V.; Shull, G.E. Loss of the Atp2c1 secretory pathway  
1532 Ca(2+)-ATPase (SPCA1) in mice causes Golgi stress, apoptosis, and  
1533 midgestational death in homozygous embryos and squamous cell tumors in

- 1534 adult heterozygotes. *J Biol Chem* **2007**, *282*, 26517-26527,  
1535 doi:10.1074/jbc.M703029200.
- 1536 90. Martin, C.A.; Sarlos, K.; Logan, C.V.; Thakur, R.S.; Parry, D.A.; Bizard, A.H.;  
1537 Leitch, A.; Cleal, L.; Ali, N.S.; Al-Owain, M.A., et al. Mutations in TOP3A Cause a  
1538 Bloom Syndrome-like Disorder. *Am J Hum Genet* **2018**, *103*, 221-231,  
1539 doi:10.1016/j.ajhg.2018.07.001.
- 1540 91. Bai, Y.; Li, L.D.; Li, J.; Lu, X. Targeting of topoisomerases for prognosis and  
1541 drug resistance in ovarian cancer. *J Ovarian Res* **2016**, *9*, 35,  
1542 doi:10.1186/s13048-016-0244-9.
- 1543 92. Broberg, K.; Huynh, E.; Schlawicke Engstrom, K.; Bjork, J.; Albin, M.; Ingvar, C.;  
1544 Olsson, H.; Høglund, M. Association between polymorphisms in RMI1, TOP3A,  
1545 and BLM and risk of cancer, a case-control study. *BMC Cancer* **2009**, *9*, 140,  
1546 doi:10.1186/1471-2407-9-140.
- 1547 93. Ge, J.; Chen, Q.; Liu, B.; Wang, L.; Zhang, S.; Ji, B. Knockdown of Rab21 inhibits  
1548 proliferation and induces apoptosis in human glioma cells. *Cell Mol Biol Lett*  
1549 **2017**, *22*, 30, doi:10.1186/s11658-017-0062-0.
- 1550 94. Hooper, S.; Gaggioli, C.; Sahai, E. A chemical biology screen reveals a role for  
1551 Rab21-mediated control of actomyosin contractility in fibroblast-driven  
1552 cancer invasion. *Br J Cancer* **2010**, *102*, 392-402, doi:10.1038/sj.bjc.6605469.
- 1553 95. Zhou, Y.; Wu, B.; Li, J.H.; Nan, G.; Jiang, J.L.; Chen, Z.N. Rab22a enhances CD147  
1554 recycling and is required for lung cancer cell migration and invasion. *Exp Cell*  
1555 *Res* **2017**, *357*, 9-16, doi:10.1016/j.yexcr.2017.04.020.
- 1556 96. Wang, T.; Gilkes, D.M.; Takano, N.; Xiang, L.; Luo, W.; Bishop, C.J.; Chaturvedi,  
1557 P.; Green, J.J.; Semenza, G.L. Hypoxia-inducible factors and RAB22A mediate  
1558 formation of microvesicles that stimulate breast cancer invasion and  
1559 metastasis. *Proc Natl Acad Sci U S A* **2014**, *111*, E3234-3242,  
1560 doi:10.1073/pnas.1410041111.
- 1561 97. Zhang, Y.; Zhao, F.J.; Chen, L.L.; Wang, L.Q.; Nephew, K.P.; Wu, Y.L.; Zhang, S.  
1562 MiR-373 targeting of the Rab22a oncogene suppresses tumor invasion and  
1563 metastasis in ovarian cancer. *Oncotarget* **2014**, *5*, 12291-12303,  
1564 doi:10.18632/oncotarget.2577.
- 1565 98. Costello, J.L.; Castro, I.G.; Schrader, T.A.; Islinger, M.; Schrader, M. Peroxisomal  
1566 ACBD4 interacts with VAPB and promotes ER-peroxisome associations. *Cell*  
1567 *Cycle* **2017**, *16*, 1039-1045, doi:10.1080/15384101.2017.1314422.
- 1568 99. Chavez-Blanco, A.; Perez-Plasencia, C.; Perez-Cardenas, E.; Carrasco-Legleu,  
1569 C.; Rangel-Lopez, E.; Segura-Pacheco, B.; Taja-Chayeb, L.; Trejo-Becerril, C.;  
1570 Gonzalez-Fierro, A.; Candelaria, M., et al. Antineoplastic effects of the DNA  
1571 methylation inhibitor hydralazine and the histone deacetylase inhibitor  
1572 valproic acid in cancer cell lines. *Cancer Cell Int* **2006**, *6*, 2,  
1573 doi:10.1186/1475-2867-6-2.
- 1574 100. Hua, R.; Cheng, D.; Coyaud, E.; Freeman, S.; Di Pietro, E.; Wang, Y.; Vissa, A.;  
1575 Yip, C.M.; Fairn, G.D.; Braverman, N., et al. VAPs and ACBD5 tether  
1576 peroxisomes to the ER for peroxisome maintenance and lipid homeostasis. *J*  
1577 *Cell Biol* **2017**, *216*, 367-377, doi:10.1083/jcb.201608128.
- 1578 101. Shen, K.; Rice, S.D.; Gingrich, D.A.; Wang, D.; Mi, Z.; Tian, C.; Ding, Z.; Brower,  
1579 S.L.; Ervin, P.R., Jr.; Gabrin, M.J., et al. Distinct genes related to drug response

- 1580 identified in ER positive and ER negative breast cancer cell lines. *PLoS One*  
1581 **2012**, 7, e40900, doi:10.1371/journal.pone.0040900.
- 1582 102. Venturini, I.; Zeneroli, M.L.; Corsi, L.; Avallone, R.; Farina, F.; Alho, H.; Baraldi,  
1583 C.; Ferrarese, C.; Pecora, N.; Frigo, M., et al. Up-regulation of peripheral  
1584 benzodiazepine receptor system in hepatocellular carcinoma. *Life Sci* **1998**,  
1585 **63**, 1269-1280.
- 1586 103. Harris, F.T.; Rahman, S.M.; Hassanein, M.; Qian, J.; Hoeksema, M.D.; Chen, H.;  
1587 Eisenberg, R.; Chaurand, P.; Caprioli, R.M.; Shiota, M., et al. Acyl-coenzyme A-  
1588 binding protein regulates Beta-oxidation required for growth and survival of  
1589 non-small cell lung cancer. *Cancer Prev Res (Phila)* **2014**, 7, 748-757,  
1590 doi:10.1158/1940-6207.CAPR-14-0057.
- 1591 104. Yang, H.; Chen, J.; Yang, J.; Qiao, S.; Zhao, S.; Yu, L. Cyclophilin A is upregulated  
1592 in small cell lung cancer and activates ERK1/2 signal. *Biochem Biophys Res*  
1593 *Commun* **2007**, 361, 763-767, doi:10.1016/j.bbrc.2007.07.085.
- 1594 105. Qi, Y.J.; He, Q.Y.; Ma, Y.F.; Du, Y.W.; Liu, G.C.; Li, Y.J.; Tsao, G.S.; Ngai, S.M.; Chiu,  
1595 J.F. Proteomic identification of malignant transformation-related proteins in  
1596 esophageal squamous cell carcinoma. *J Cell Biochem* **2008**, 104, 1625-1635,  
1597 doi:10.1002/jcb.21727.
- 1598 106. Li, M.; Zhai, Q.; Bharadwaj, U.; Wang, H.; Li, F.; Fisher, W.E.; Chen, C.; Yao, Q.  
1599 Cyclophilin A is overexpressed in human pancreatic cancer cells and  
1600 stimulates cell proliferation through CD147. *Cancer* **2006**, 106, 2284-2294,  
1601 doi:10.1002/cncr.21862.
- 1602 107. Yamashita, Y.; Nishiumi, S.; Kono, S.; Takao, S.; Azuma, T.; Yoshida, M.  
1603 Differences in elongation of very long chain fatty acids and fatty acid  
1604 metabolism between triple-negative and hormone receptor-positive breast  
1605 cancer. *BMC Cancer* **2017**, 17, 589, doi:10.1186/s12885-017-3554-4.
- 1606 108. Mika, A.; Kobiela, J.; Czumaj, A.; Chmielewski, M.; Stepnowski, P.; Sledzinski,  
1607 T. Hyper-Elongation in Colorectal Cancer Tissue - Cerotic Acid is a Potential  
1608 Novel Serum Metabolic Marker of Colorectal Malignancies. *Cell Physiol*  
1609 *Biochem* **2017**, 41, 722-730, doi:10.1159/000458431.
- 1610 109. Zekri, A.R.; Hassan, Z.K.; Bahnassy, A.A.; Sherif, G.M.; D, E.L.; Abouelhoda, M.;  
1611 Ali, A.; Hafez, M.M. Molecular prognostic profile of Egyptian HCC cases  
1612 infected with hepatitis C virus. *Asian Pac J Cancer Prev* **2012**, 13, 5433-5438.
- 1613 110. Su, Y.C.; Feng, Y.H.; Wu, H.T.; Huang, Y.S.; Tung, C.L.; Wu, P.; Chang, C.J.; Shiau,  
1614 A.L.; Wu, C.L. Elovl6 is a negative clinical predictor for liver cancer and  
1615 knockdown of Elovl6 reduces murine liver cancer progression. *Sci Rep* **2018**,  
1616 **8**, 6586, doi:10.1038/s41598-018-24633-3.
- 1617 111. Feng, Y.H.; Chen, W.Y.; Kuo, Y.H.; Tung, C.L.; Tsao, C.J.; Shiau, A.L.; Wu, C.L.  
1618 Elovl6 is a poor prognostic predictor in breast cancer. *Oncol Lett* **2016**, 12,  
1619 207-212, doi:10.3892/ol.2016.4587.
- 1620 112. Liang, H.F.; Zhang, X.Z.; Liu, B.G.; Jia, G.T.; Li, W.L. Circular RNA circ-ABCB10  
1621 promotes breast cancer proliferation and progression through sponging miR-  
1622 1271. *Am J Cancer Res* **2017**, 7, 1566-1576.
- 1623 113. Gagou, M.E.; Ganesh, A.; Phear, G.; Robinson, D.; Petermann, E.; Cox, A.; Meuth,  
1624 M. Human PIF1 helicase supports DNA replication and cell growth under

- 1625 oncogenic-stress. *Oncotarget* **2014**, *5*, 11381-11398,  
1626 doi:10.18632/oncotarget.2501.
- 1627 114. Lim, K.H.; Kim, K.H.; Choi, S.I.; Park, E.S.; Park, S.H.; Ryu, K.; Park, Y.K.; Kwon,  
1628 S.Y.; Yang, S.I.; Lee, H.C., et al. RPS3a over-expressed in HBV-associated  
1629 hepatocellular carcinoma enhances the HBx-induced NF-kappaB signaling via  
1630 its novel chaperoning function. *PLoS One* **2011**, *6*, e22258,  
1631 doi:10.1371/journal.pone.0022258.
- 1632 115. Slizhikova, D.K.; Vinogradova, T.V.; Sverdlov, E.D. [The NOLA2 and RPS3A  
1633 genes as highly informative markers for human squamous cell lung cancer].  
1634 *Bioorg Khim* **2005**, *31*, 195-199.
- 1635 116. Yang, C.; Zheng, J.; Xue, Y.; Yu, H.; Liu, X.; Ma, J.; Liu, L.; Wang, P.; Li, Z.; Cai, H.,  
1636 et al. The Effect of MCM3AP-AS1/miR-211/KLF5/AGGF1 Axis Regulating  
1637 Glioblastoma Angiogenesis. *Front Mol Neurosci* **2017**, *10*, 437,  
1638 doi:10.3389/fnmol.2017.00437.
- 1639 117. Tang, X.; Xu, Y.; Lu, L.; Jiao, Y.; Liu, J.; Wang, L.; Zhao, H. Identification of key  
1640 candidate genes and small molecule drugs in cervical cancer by  
1641 bioinformatics strategy. *Cancer Manag Res* **2018**, *10*, 3533-3549,  
1642 doi:10.2147/CMAR.S171661.
- 1643 118. Han, M.E.; Kim, J.Y.; Kim, G.H.; Park, S.Y.; Kim, Y.H.; Oh, S.O. SAC3D1: a novel  
1644 prognostic marker in hepatocellular carcinoma. *Sci Rep* **2018**, *8*, 15608,  
1645 doi:10.1038/s41598-018-34129-9.
- 1646 119. Zhang, M.; Zhang, C.; Du, W.; Yang, X.; Chen, Z. ATAD2 is overexpressed in  
1647 gastric cancer and serves as an independent poor prognostic biomarker. *Clin*  
1648 *Transl Oncol* **2016**, *18*, 776-781, doi:10.1007/s12094-015-1430-8.
- 1649 120. Kalashnikova, E.V.; Revenko, A.S.; Gemo, A.T.; Andrews, N.P.; Tepper, C.G.;  
1650 Zou, J.X.; Cardiff, R.D.; Borowsky, A.D.; Chen, H.W. ANCCA/ATAD2  
1651 overexpression identifies breast cancer patients with poor prognosis, acting  
1652 to drive proliferation and survival of triple-negative cells through control of  
1653 B-Myb and EZH2. *Cancer Res* **2010**, *70*, 9402-9412, doi:10.1158/0008-  
1654 5472.CAN-10-1199.
- 1655 121. Zhang, Y.; Sun, Y.; Li, Y.; Fang, Z.; Wang, R.; Pan, Y.; Hu, H.; Luo, X.; Ye, T.; Li, H.,  
1656 et al. ANCCA protein expression is a novel independent poor prognostic  
1657 marker in surgically resected lung adenocarcinoma. *Ann Surg Oncol* **2013**, *20*  
1658 *Suppl 3*, S577-582, doi:10.1245/s10434-013-3027-1.
- 1659 122. Luo, Y.; Ye, G.Y.; Qin, S.L.; Yu, M.H.; Mu, Y.F.; Zhong, M. ATAD2 Overexpression  
1660 Identifies Colorectal Cancer Patients with Poor Prognosis and Drives  
1661 Proliferation of Cancer Cells. *Gastroenterol Res Pract* **2015**, *2015*, 936564,  
1662 doi:10.1155/2015/936564.
- 1663 123. Hou, M.; Huang, R.; Song, Y.; Feng, D.; Jiang, Y.; Liu, M. ATAD2 overexpression  
1664 is associated with progression and prognosis in colorectal cancer. *Jpn J Clin*  
1665 *Oncol* **2016**, *46*, 222-227, doi:10.1093/jjco/hyv195.
- 1666 124. Zheng, L.; Li, T.; Zhang, Y.; Guo, Y.; Yao, J.; Dou, L.; Guo, K. Oncogene ATAD2  
1667 promotes cell proliferation, invasion and migration in cervical cancer. *Oncol*  
1668 *Rep* **2015**, *33*, 2337-2344, doi:10.3892/or.2015.3867.

- 1669 125. Hwang, H.W.; Ha, S.Y.; Bang, H.; Park, C.K. ATAD2 as a Poor Prognostic  
1670 Marker for Hepatocellular Carcinoma after Curative Resection. *Cancer Res*  
1671 *Treat* **2015**, *47*, 853-861, doi:10.4143/crt.2014.177.
- 1672 126. Usui, T.; Ohta, T.; Oshiumi, H.; Tomizawa, J.; Ogawa, H.; Ogawa, T. Complex  
1673 formation and functional versatility of Mre11 of budding yeast in  
1674 recombination. *Cell* **1998**, *95*, 705-716.
- 1675 127. Ewald, B.; Sampath, D.; Plunkett, W. ATM and the Mre11-Rad50-Nbs1  
1676 complex respond to nucleoside analogue-induced stalled replication forks  
1677 and contribute to drug resistance. *Cancer Res* **2008**, *68*, 7947-7955,  
1678 doi:10.1158/0008-5472.CAN-08-0971.
- 1679 128. Karnitz, L.M.; Flatten, K.S.; Wagner, J.M.; Loegering, D.; Hackbarth, J.S.;  
1680 Arlander, S.J.; Vroman, B.T.; Thomas, M.B.; Baek, Y.U.; Hopkins, K.M., et al.  
1681 Gemcitabine-induced activation of checkpoint signaling pathways that affect  
1682 tumor cell survival. *Mol Pharmacol* **2005**, *68*, 1636-1644,  
1683 doi:10.1124/mol.105.012716.
- 1684 129. Okazaki, T.; Jiao, L.; Chang, P.; Evans, D.B.; Abbruzzese, J.L.; Li, D. Single-  
1685 nucleotide polymorphisms of DNA damage response genes are associated  
1686 with overall survival in patients with pancreatic cancer. *Clin Cancer Res*  
1687 **2008**, *14*, 2042-2048, doi:10.1158/1078-0432.CCR-07-1520.
- 1688 130. Irlbacher, H.; Franke, J.; Manke, T.; Vingron, M.; Ehrenhofer-Murray, A.E.  
1689 Control of replication initiation and heterochromatin formation in  
1690 *Saccharomyces cerevisiae* by a regulator of meiotic gene expression. *Genes &*  
1691 *development* **2005**, *19*, 1811-1822, doi:10.1101/gad.334805.
- 1692 131. Weber, J.M.; Irlbacher, H.; Ehrenhofer-Murray, A.E. Control of replication  
1693 initiation by the Sum1/Rfm1/Hst1 histone deacetylase. *BMC Mol Biol* **2008**,  
1694 *9*, 100, doi:10.1186/1471-2199-9-100.
- 1695 132. Knott, S.R.; Peace, J.M.; Ostrow, A.Z.; Gan, Y.; Rex, A.E.; Viggiani, C.J.; Tavaré, S.;  
1696 Aparicio, O.M. Forkhead transcription factors establish origin timing and  
1697 long-range clustering in *S. cerevisiae*. *Cell* **2012**, *148*, 99-111,  
1698 doi:10.1016/j.cell.2011.12.012.
- 1699 133. Wang, J.; Cai, X.; Xia, L.; Zhou, J.; Xin, J.; Liu, M.; Shang, X.; Liu, J.; Li, X.; Chen, Z.,  
1700 et al. Decreased expression of FOXJ1 is a potential prognostic predictor for  
1701 progression and poor survival of gastric cancer. *Ann Surg Oncol* **2015**, *22*,  
1702 685-692, doi:10.1245/s10434-014-3742-2.
- 1703 134. Li, J.V.; Chien, C.D.; Garee, J.P.; Xu, J.; Wellstein, A.; Riegel, A.T. Transcriptional  
1704 repression of AIB1 by FoxG1 leads to apoptosis in breast cancer cells. *Mol*  
1705 *Endocrinol* **2013**, *27*, 1113-1127, doi:10.1210/me.2012-1353.
- 1706 135. Jin, J.; Zhou, S.; Li, C.; Xu, R.; Zu, L.; You, J.; Zhang, B. MiR-517a-3p accelerates  
1707 lung cancer cell proliferation and invasion through inhibiting FOXJ3  
1708 expression. *Life Sci* **2014**, *108*, 48-53, doi:10.1016/j.lfs.2014.05.006.
- 1709 136. Ma, W.; Yu, Q.; Jiang, J.; Du, X.; Huang, L.; Zhao, L.; Zhou, Q.I. miR-517a is an  
1710 independent prognostic marker and contributes to cell migration and  
1711 invasion in human colorectal cancer. *Oncol Lett* **2016**, *11*, 2583-2589,  
1712 doi:10.3892/ol.2016.4269.

- 1713 137. Liu, Y.; Zhang, L.; Meng, Y.; Huang, L. Benzyl isothiocyanate inhibits breast  
1714 cancer cell tumorigenesis via repression of the FoxH1-Mediated Wnt/beta-  
1715 catenin pathway. *Int J Clin Exp Med* **2015**, *8*, 17601-17611.
- 1716 138. Jin, Y.; Cao, Q.; Chen, C.; Du, X.; Jin, B.; Pan, J. Tenovin-6-mediated inhibition of  
1717 SIRT1/2 induces apoptosis in acute lymphoblastic leukemia (ALL) cells and  
1718 eliminates ALL stem/progenitor cells. *BMC Cancer* **2015**, *15*, 226,  
1719 doi:10.1186/s12885-015-1282-1.
- 1720 139. Gong, D.J.; Zhang, J.M.; Yu, M.; Zhuang, B.; Guo, Q.Q. Inhibition of SIRT1  
1721 combined with gemcitabine therapy for pancreatic carcinoma. *Clin Interv*  
1722 *Aging* **2013**, *8*, 889-897, doi:10.2147/CIA.S45064.
- 1723 140. Balderhaar, H.J.; Ungermann, C. CORVET and HOPS tethering complexes -  
1724 coordinators of endosome and lysosome fusion. *J Cell Sci* **2013**, *126*, 1307-  
1725 1316, doi:10.1242/jcs.107805.
- 1726 141. Solinger, J.A.; Spang, A. Tethering complexes in the endocytic pathway:  
1727 CORVET and HOPS. *FEBS J* **2013**, *280*, 2743-2757, doi:10.1111/febs.12151.
- 1728 142. Laidlaw, K.M.E.; MacDonald, C. Endosomal trafficking of yeast membrane  
1729 proteins. *Biochemical Society transactions* **2018**, *46*, 1551-1558,  
1730 doi:10.1042/BST20180258.
- 1731 143. Henne, W.M.; Buchkovich, N.J.; Emr, S.D. The ESCRT pathway. *Dev Cell* **2011**,  
1732 *21*, 77-91, doi:10.1016/j.devcel.2011.05.015.
- 1733 144. Cohen, M.; Stutz, F.; Belgareh, N.; Haguenaer-Tsapis, R.; Dargemont, C. Ubp3  
1734 requires a cofactor, Bre5, to specifically de-ubiquitinate the COPII protein,  
1735 Sec23. *Nat Cell Biol* **2003**, *5*, 661-667, doi:10.1038/ncb1003.
- 1736 145. Schuldiner, M.; Collins, S.R.; Thompson, N.J.; Denic, V.; Bhamidipati, A.; Punna,  
1737 T.; Ihmels, J.; Andrews, B.; Boone, C.; Greenblatt, J.F., et al. Exploration of the  
1738 function and organization of the yeast early secretory pathway through an  
1739 epistatic miniarray profile. *Cell* **2005**, *123*, 507-519,  
1740 doi:10.1016/j.cell.2005.08.031.
- 1741 146. Schuldiner, M.; Metz, J.; Schmid, V.; Denic, V.; Rakwalska, M.; Schmitt, H.D.;  
1742 Schwappach, B.; Weissman, J.S. The GET complex mediates insertion of tail-  
1743 anchored proteins into the ER membrane. *Cell* **2008**, *134*, 634-645,  
1744 doi:10.1016/j.cell.2008.06.025.
- 1745 147. Beilharz, T.; Egan, B.; Silver, P.A.; Hofmann, K.; Lithgow, T. Bipartite signals  
1746 mediate subcellular targeting of tail-anchored membrane proteins in  
1747 *Saccharomyces cerevisiae*. *The Journal of biological chemistry* **2003**, *278*,  
1748 8219-8223, doi:10.1074/jbc.M212725200.
- 1749 148. Ibarrola-Villava, M.; Kumar, R.; Nagore, E.; Benfodda, M.; Guedj, M.; Gazal, S.;  
1750 Hu, H.H.; Guan, J.; Rachkonda, P.S.; Descamps, V., et al. Genes involved in the  
1751 WNT and vesicular trafficking pathways are associated with melanoma  
1752 predisposition. *Int J Cancer* **2015**, *136*, 2109-2119, doi:10.1002/ijc.29257.
- 1753 149. Dutta, S.; Roy, S.; Polavaram, N.S.; Baretton, G.B.; Muders, M.H.; Batra, S.;  
1754 Datta, K. NRP2 transcriptionally regulates its downstream effector WDFY1.  
1755 *Sci Rep* **2016**, *6*, 23588, doi:10.1038/srep23588.
- 1756 150. Dutta, S.; Roy, S.; Polavaram, N.S.; Stanton, M.J.; Zhang, H.; Bhola, T.;  
1757 Honscheid, P.; Donohue, T.M., Jr.; Band, H.; Batra, S.K., et al. Neuropilin-2  
1758 Regulates Endosome Maturation and EGFR Trafficking to Support Cancer Cell

- 1759 Pathobiology. *Cancer Res* **2016**, 76, 418-428, doi:10.1158/0008-5472.CAN-  
1760 15-1488.
- 1761 151. Girirajan, S.; Hauck, P.M.; Williams, S.; Vlangos, C.N.; Szomju, B.B.; Solaymani-  
1762 Kohal, S.; Mosier, P.D.; White, K.L., Jr.; McCoy, K.; Elsea, S.H. Tom112  
1763 hypomorphic mice exhibit increased incidence of infections and tumors and  
1764 abnormal immunologic response. *Mamm Genome* **2008**, 19, 246-262,  
1765 doi:10.1007/s00335-008-9100-6.
- 1766 152. Lachmann, J.; Glaubke, E.; Moore, P.S.; Ungermann, C. The Vps39-like TRAP1  
1767 is an effector of Rab5 and likely the missing Vps3 subunit of human CORVET.  
1768 *Cell Logist* **2014**, 4, e970840, doi:10.4161/21592780.2014.970840.
- 1769 153. Chabes, A.; Georgieva, B.; Domkin, V.; Zhao, X.; Rothstein, R.; Thelander, L.  
1770 Survival of DNA damage in yeast directly depends on increased dNTP levels  
1771 allowed by relaxed feedback inhibition of ribonucleotide reductase. *Cell*  
1772 **2003**, 112, 391-401.
- 1773 154. Wu, Y.; Li, X.; Yu, J.; Bjorkholm, M.; Xu, D. ASF1a inhibition induces p53-  
1774 dependent growth arrest and senescence of cancer cells. *Cell Death Dis* **2019**,  
1775 10, 76, doi:10.1038/s41419-019-1357-z.
- 1776 155. Tkach, J.M.; Yimit, A.; Lee, A.Y.; Riffle, M.; Costanzo, M.; Jaschob, D.; Hendry,  
1777 J.A.; Ou, J.; Moffat, J.; Boone, C., et al. Dissecting DNA damage response  
1778 pathways by analysing protein localization and abundance changes during  
1779 DNA replication stress. *Nat Cell Biol* **2012**, 14, 966-976,  
1780 doi:10.1038/ncb2549.
- 1781 156. Chong, P.S.; Zhou, J.; Cheong, L.L.; Liu, S.C.; Qian, J.; Guo, T.; Sze, S.K.; Zeng, Q.;  
1782 Chng, W.J. LE01 is regulated by PRL-3 and mediates its oncogenic properties  
1783 in acute myelogenous leukemia. *Cancer Res* **2014**, 74, 3043-3053,  
1784 doi:10.1158/0008-5472.CAN-13-2321.
- 1785 157. Yang, B.; Miao, S.; Zhang, L.N.; Sun, H.B.; Xu, Z.N.; Han, C.S. Correlation of  
1786 CCNA1 promoter methylation with malignant tumors: a meta-analysis  
1787 introduction. *Biomed Res Int* **2015**, 2015, 134027,  
1788 doi:10.1155/2015/134027.
- 1789 158. Hendrick, E.; Peixoto, P.; Blomme, A.; Polese, C.; Matheus, N.; Cimino, J.; Frere,  
1790 A.; Mouithys-Mickalad, A.; Serteyn, D.; Bettendorff, L., et al. Metabolic  
1791 inhibitors accentuate the anti-tumoral effect of HDAC5 inhibition. *Oncogene*  
1792 **2017**, 36, 4859-4874, doi:10.1038/onc.2017.103.
- 1793 159. Wang, X.X.; Wan, R.Z.; Liu, Z.P. Recent advances in the discovery of potent and  
1794 selective HDAC6 inhibitors. *Eur J Med Chem* **2018**, 143, 1406-1418,  
1795 doi:10.1016/j.ejmech.2017.10.040.
- 1796 160. Xu, X.; Xie, C.; Edwards, H.; Zhou, H.; Buck, S.A.; Ge, Y. Inhibition of histone  
1797 deacetylases 1 and 6 enhances cytarabine-induced apoptosis in pediatric  
1798 acute myeloid leukemia cells. *PLoS One* **2011**, 6, e17138,  
1799 doi:10.1371/journal.pone.0017138.
- 1800 161. Iwahashi, S.; Shimada, M.; Utsunomiya, T.; Morine, Y.; Imura, S.; Ikemoto, T.;  
1801 Mori, H.; Hanaoka, J.; Sugimoto, K.; Saito, Y. Histone deacetylase inhibitor  
1802 augments anti-tumor effect of gemcitabine and pegylated interferon-alpha on  
1803 pancreatic cancer cells. *Int J Clin Oncol* **2011**, 16, 671-678,  
1804 doi:10.1007/s10147-011-0246-y.

- 1805 162. Arnold, N.B.; Arkus, N.; Gunn, J.; Korc, M. The histone deacetylase inhibitor  
1806 suberoylanilide hydroxamic acid induces growth inhibition and enhances  
1807 gemcitabine-induced cell death in pancreatic cancer. *Clin Cancer Res* **2007**,  
1808 *13*, 18-26, doi:10.1158/1078-0432.CCR-06-0914.
- 1809 163. Cai, M.H.; Xu, X.G.; Yan, S.L.; Sun, Z.; Ying, Y.; Wang, B.K.; Tu, Y.X. Depletion of  
1810 HDAC1, 7 and 8 by Histone Deacetylase Inhibition Confers Elimination of  
1811 Pancreatic Cancer Stem Cells in Combination with Gemcitabine. *Sci Rep* **2018**,  
1812 *8*, 1621, doi:10.1038/s41598-018-20004-0.
- 1813 164. Sung, V.; Richard, N.; Brady, H.; Maier, A.; Kelter, G.; Heise, C. Histone  
1814 deacetylase inhibitor MGCD0103 synergizes with gemcitabine in human  
1815 pancreatic cells. *Cancer Sci* **2011**, *102*, 1201-1207, doi:10.1111/j.1349-  
1816 7006.2011.01921.x.
- 1817 165. Ji, M.; Li, Z.; Lin, Z.; Chen, L. Antitumor activity of the novel HDAC inhibitor  
1818 CUDC-101 combined with gemcitabine in pancreatic cancer. *Am J Cancer Res*  
1819 **2018**, *8*, 2402-2418.
- 1820 166. Song, T.; Yang, L.; Kabra, N.; Chen, L.; Koomen, J.; Haura, E.B.; Chen, J. The  
1821 NAD<sup>+</sup> synthesis enzyme nicotinamide mononucleotide adenylyltransferase  
1822 (NMNAT1) regulates ribosomal RNA transcription. *The Journal of biological*  
1823 *chemistry* **2013**, *288*, 20908-20917, doi:10.1074/jbc.M113.470302.
- 1824 167. Li, H.; Feng, Z.; Wu, W.; Li, J.; Zhang, J.; Xia, T. SIRT3 regulates cell  
1825 proliferation and apoptosis related to energy metabolism in non-small cell  
1826 lung cancer cells through deacetylation of NMNAT2. *Int J Oncol* **2013**, *43*,  
1827 1420-1430, doi:10.3892/ijo.2013.2103.
- 1828 168. Kim, M.M.; Camelo-Piragua, S.; Schipper, M.; Tao, Y.; Normolle, D.; Junck, L.;  
1829 Mammoser, A.; Betz, B.L.; Cao, Y.; Kim, C.J., et al. Gemcitabine Plus Radiation  
1830 Therapy for High-Grade Glioma: Long-Term Results of a Phase 1 Dose-  
1831 Escalation Study. *Int J Radiat Oncol Biol Phys* **2016**, *94*, 305-311,  
1832 doi:10.1016/j.ijrobp.2015.10.032.
- 1833 169. Rao, M.; Song, W.; Jiang, A.; Shyr, Y.; Lev, S.; Greenstein, D.; Brantley-Sieders,  
1834 D.; Chen, J. VAMP-associated protein B (VAPB) promotes breast tumor  
1835 growth by modulation of Akt activity. *PLoS One* **2012**, *7*, e46281,  
1836 doi:10.1371/journal.pone.0046281.
- 1837 170. Yang, M.C.; Wang, H.C.; Hou, Y.C.; Tung, H.L.; Chiu, T.J.; Shan, Y.S. Blockade of  
1838 autophagy reduces pancreatic cancer stem cell activity and potentiates the  
1839 tumoricidal effect of gemcitabine. *Mol Cancer* **2015**, *14*, 179,  
1840 doi:10.1186/s12943-015-0449-3.
- 1841 171. Takahashi, Y.; He, H.; Tang, Z.; Hattori, T.; Liu, Y.; Young, M.M.; Serfass, J.M.;  
1842 Chen, L.; Gebru, M.; Chen, C., et al. An autophagy assay reveals the ESCRT-III  
1843 component CHMP2A as a regulator of phagophore closure. *Nat Commun*  
1844 **2018**, *9*, 2855, doi:10.1038/s41467-018-05254-w.
- 1845 172. D'Arcangelo, D.; Giampietri, C.; Muscio, M.; Scatozza, F.; Facchiano, F.;  
1846 Facchiano, A. WIPI1, BAG1, and PEX3 Autophagy-Related Genes Are Relevant  
1847 Melanoma Markers. *Oxid Med Cell Longev* **2018**, *2018*, 1471682,  
1848 doi:10.1155/2018/1471682.
- 1849 173. Filimonenko, M.; Stuffers, S.; Raiborg, C.; Yamamoto, A.; Malerod, L.; Fisher,  
1850 E.M.; Isaacs, A.; Brech, A.; Stenmark, H.; Simonsen, A. Functional



- 1851 multivesicular bodies are required for autophagic clearance of protein  
1852 aggregates associated with neurodegenerative disease. *J Cell Biol* **2007**, *179*,  
1853 485-500, doi:10.1083/jcb.200702115.
- 1854 174. Luo, M.L.; Gong, C.; Chen, C.H.; Hu, H.; Huang, P.; Zheng, M.; Yao, Y.; Wei, S.;  
1855 Wulf, G.; Lieberman, J., et al. The Rab2A GTPase promotes breast cancer stem  
1856 cells and tumorigenesis via Erk signaling activation. *Cell Rep* **2015**, *11*, 111-  
1857 124, doi:10.1016/j.celrep.2015.03.002.
- 1858 175. Jin, J.; Wu, Y.; Zhou, D.; Sun, Q.; Wang, W. miR448 targets Rab2B and is pivotal  
1859 in the suppression of pancreatic cancer. *Oncol Rep* **2018**, *40*, 1379-1389,  
1860 doi:10.3892/or.2018.6562.
- 1861 176. Zhang, Y.; Huang, S.; Li, P.; Chen, Q.; Li, Y.; Zhou, Y.; Wang, L.; Kang, M.; Zhang,  
1862 B.; Yang, B., et al. Pancreatic cancer-derived exosomes suppress the  
1863 production of GIP and GLP-1 from STC-1 cells in vitro by down-regulating the  
1864 PCSK1/3. *Cancer Lett* **2018**, *431*, 190-200, doi:10.1016/j.canlet.2018.05.027.
- 1865 177. Demidyuk, I.V.; Shubin, A.V.; Gasanov, E.V.; Kurinov, A.M.; Demkin, V.V.;  
1866 Vinogradova, T.V.; Zinovyeva, M.V.; Sass, A.V.; Zborovskaya, I.B.; Kostrov, S.V.  
1867 Alterations in gene expression of proprotein convertases in human lung  
1868 cancer have a limited number of scenarios. *PLoS One* **2013**, *8*, e55752,  
1869 doi:10.1371/journal.pone.0055752.
- 1870 178. Bajikar, S.S.; Wang, C.C.; Borten, M.A.; Pereira, E.J.; Atkins, K.A.; Janes, K.A.  
1871 Tumor-Suppressor Inactivation of GDF11 Occurs by Precursor Sequestration  
1872 in Triple-Negative Breast Cancer. *Dev Cell* **2017**, *43*, 418-435 e413,  
1873 doi:10.1016/j.devcel.2017.10.027.
- 1874 179. Akada, M.; Crnogorac-Jurcevic, T.; Lattimore, S.; Mahon, P.; Lopes, R.;  
1875 Sunamura, M.; Matsuno, S.; Lemoine, N.R. Intrinsic chemoresistance to  
1876 gemcitabine is associated with decreased expression of BNIP3 in pancreatic  
1877 cancer. *Clin Cancer Res* **2005**, *11*, 3094-3101, doi:10.1158/1078-0432.CCR-  
1878 04-1785.
- 1879 180. Kanki, T.; Wang, K.; Baba, M.; Bartholomew, C.R.; Lynch-Day, M.A.; Du, Z.;  
1880 Geng, J.; Mao, K.; Yang, Z.; Yen, W.L., et al. A genomic screen for yeast mutants  
1881 defective in selective mitochondria autophagy. *Molecular biology of the cell*  
1882 **2009**, *20*, 4730-4738, doi:10.1091/mbc.E09-03-0225.
- 1883 181. Johnson, I.R.; Parkinson-Lawrence, E.J.; Keegan, H.; Spillane, C.D.; Barry-  
1884 O'Crowley, J.; Watson, W.R.; Selemidis, S.; Butler, L.M.; O'Leary, J.J.; Brooks,  
1885 D.A. Endosomal gene expression: a new indicator for prostate cancer patient  
1886 prognosis? *Oncotarget* **2015**, *6*, 37919-37929,  
1887 doi:10.18632/oncotarget.6114.
- 1888 182. Li, F.; Hu, G.; Jiang, Z.; Guo, J.; Wang, K.; Ouyang, K.; Wen, D.; Zhu, M.; Liang, J.;  
1889 Qin, X., et al. Identification of NME5 as a contributor to innate resistance to  
1890 gemcitabine in pancreatic cancer cells. *FEBS J* **2012**, *279*, 1261-1273,  
1891 doi:10.1111/j.1742-4658.2012.08521.x.
- 1892 183. Matsumoto, A.; Arcaroli, J.; Chen, Y.; Gasparetto, M.; Neumeister, V.;  
1893 Thompson, D.C.; Singh, S.; Smith, C.; Messersmith, W.; Vasiliou, V. Aldehyde  
1894 dehydrogenase 1B1: a novel immunohistological marker for colorectal  
1895 cancer. *Br J Cancer* **2017**, *117*, 1537-1543, doi:10.1038/bjc.2017.304.

- 1896 184. Singh, S.; Arcaroli, J.J.; Orlicky, D.J.; Chen, Y.; Messersmith, W.A.; Bagby, S.;  
1897 Purkey, A.; Quackenbush, K.S.; Thompson, D.C.; Vasiliou, V. Aldehyde  
1898 Dehydrogenase 1B1 as a Modulator of Pancreatic Adenocarcinoma. *Pancreas*  
1899 **2016**, *45*, 117-122, doi:10.1097/MPA.0000000000000542.
- 1900 185. Xu, X.; Chai, S.; Wang, P.; Zhang, C.; Yang, Y.; Yang, Y.; Wang, K. Aldehyde  
1901 dehydrogenases and cancer stem cells. *Cancer Lett* **2015**, *369*, 50-57,  
1902 doi:10.1016/j.canlet.2015.08.018.
- 1903 186. Bae, J.S.; Park, S.H.; Jamiyandorj, U.; Kim, K.M.; Noh, S.J.; Kim, J.R.; Park, H.J.;  
1904 Kwon, K.S.; Jung, S.H.; Park, H.S., et al. CK2alpha/CSNK2A1 Phosphorylates  
1905 SIRT6 and Is Involved in the Progression of Breast Carcinoma and Predicts  
1906 Shorter Survival of Diagnosed Patients. *Am J Pathol* **2016**, *186*, 3297-3315,  
1907 doi:10.1016/j.ajpath.2016.08.007.
- 1908 187. Xie, Z.C.; Tang, R.X.; Gao, X.; Xie, Q.N.; Lin, J.Y.; Chen, G.; Li, Z.Y. A meta-analysis  
1909 and bioinformatics exploration of the diagnostic value and molecular  
1910 mechanism of miR-193a-5p in lung cancer. *Oncol Lett* **2018**, *16*, 4114-4128,  
1911 doi:10.3892/ol.2018.9174.
- 1912 188. Laramas, M.; Pasquier, D.; Filhol, O.; Ringeisen, F.; Descotes, J.L.; Cochet, C.  
1913 Nuclear localization of protein kinase CK2 catalytic subunit (CK2alpha) is  
1914 associated with poor prognostic factors in human prostate cancer. *Eur J*  
1915 *Cancer* **2007**, *43*, 928-934, doi:10.1016/j.ejca.2006.11.021.
- 1916 189. Zou, J.; Luo, H.; Zeng, Q.; Dong, Z.; Wu, D.; Liu, L. Protein kinase CK2alpha is  
1917 overexpressed in colorectal cancer and modulates cell proliferation and  
1918 invasion via regulating EMT-related genes. *J Transl Med* **2011**, *9*, 97,  
1919 doi:10.1186/1479-5876-9-97.
- 1920 190. Bae, J.S.; Park, S.H.; Kim, K.M.; Kwon, K.S.; Kim, C.Y.; Lee, H.K.; Park, B.H.; Park,  
1921 H.S.; Lee, H.; Moon, W.S., et al. CK2alpha phosphorylates DBC1 and is involved  
1922 in the progression of gastric carcinoma and predicts poor survival of gastric  
1923 carcinoma patients. *Int J Cancer* **2015**, *136*, 797-809, doi:10.1002/ijc.29043.
- 1924 191. Trembley, J.H.; Wang, G.; Unger, G.; Slaton, J.; Ahmed, K. Protein kinase CK2 in  
1925 health and disease: CK2: a key player in cancer biology. *Cell Mol Life Sci* **2009**,  
1926 *66*, 1858-1867, doi:10.1007/s00018-009-9154-y.
- 1927 192. Wang, F.; Chang, J.T.; Kao, C.J.; Huang, R.S. High Expression of miR-532-5p, a  
1928 Tumor Suppressor, Leads to Better Prognosis in Ovarian Cancer Both In Vivo  
1929 and In Vitro. *Mol Cancer Ther* **2016**, *15*, 1123-1131, doi:10.1158/1535-  
1930 7163.MCT-15-0943.
- 1931 193. Hanif, I.M.; Hanif, I.M.; Shazib, M.A.; Ahmad, K.A.; Pervaiz, S. Casein Kinase II:  
1932 an attractive target for anti-cancer drug design. *Int J Biochem Cell Biol* **2010**,  
1933 *42*, 1602-1605, doi:10.1016/j.biocel.2010.06.010.
- 1934 194. Gan, Y.; Li, Y.; Li, T.; Shu, G.; Yin, G. CCNA2 acts as a novel biomarker in  
1935 regulating the growth and apoptosis of colorectal cancer. *Cancer Manag Res*  
1936 **2018**, *10*, 5113-5124, doi:10.2147/CMAR.S176833.
- 1937 195. Gao, T.; Han, Y.; Yu, L.; Ao, S.; Li, Z.; Ji, J. CCNA2 is a prognostic biomarker for  
1938 ER+ breast cancer and tamoxifen resistance. *PLoS One* **2014**, *9*, e91771,  
1939 doi:10.1371/journal.pone.0091771.

- 1940 196. Ding, K.; Li, W.; Zou, Z.; Zou, X.; Wang, C. CCNB1 is a prognostic biomarker for  
1941 ER+ breast cancer. *Med Hypotheses* **2014**, *83*, 359-364,  
1942 doi:10.1016/j.mehy.2014.06.013.
- 1943 197. Fang, Y.; Yu, H.; Liang, X.; Xu, J.; Cai, X. Chk1-induced CCNB1 overexpression  
1944 promotes cell proliferation and tumor growth in human colorectal cancer.  
1945 *Cancer Biol Ther* **2014**, *15*, 1268-1279, doi:10.4161/cbt.29691.
- 1946 198. Oji, Y.; Tatsumi, N.; Fukuda, M.; Nakatsuka, S.; Aoyagi, S.; Hirata, E.; Nanchi, I.;  
1947 Fujiki, F.; Nakajima, H.; Yamamoto, Y., et al. The translation elongation factor  
1948 eEF2 is a novel tumor-associated antigen overexpressed in various types of  
1949 cancers. *Int J Oncol* **2014**, *44*, 1461-1469, doi:10.3892/ijo.2014.2318.
- 1950 199. Sato, N.; Maeda, M.; Sugiyama, M.; Ito, S.; Hyodo, T.; Masuda, A.; Tsunoda, N.;  
1951 Kokuryo, T.; Hamaguchi, M.; Nagino, M., et al. Inhibition of SNW1 association  
1952 with spliceosomal proteins promotes apoptosis in breast cancer cells. *Cancer*  
1953 *Med* **2015**, *4*, 268-277, doi:10.1002/cam4.366.
- 1954 200. Koller-Eichhorn, R.; Marquardt, T.; Gail, R.; Wittinghofer, A.; Kostrewa, D.;  
1955 Kutay, U.; Kambach, C. Human OLA1 defines an ATPase subfamily in the Obg  
1956 family of GTP-binding proteins. *The Journal of biological chemistry* **2007**, *282*,  
1957 19928-19937, doi:10.1074/jbc.M700541200.
- 1958 201. Becker, M.; Gzyl, K.E.; Altamirano, A.M.; Vuong, A.; Urban, K.; Wieden, H.J. The  
1959 70S ribosome modulates the ATPase activity of Escherichia coli YchF. *RNA*  
1960 *Biol* **2012**, *9*, 1288-1301, doi:10.4161/rna.22131.
- 1961 202. Bai, L.; Yu, Z.; Zhang, J.; Yuan, S.; Liao, C.; Jeyabal, P.V.; Rubio, V.; Chen, H.; Li,  
1962 Y.; Shi, Z.Z. OLA1 contributes to epithelial-mesenchymal transition in lung  
1963 cancer by modulating the GSK3beta/snail/E-cadherin signaling. *Oncotarget*  
1964 **2016**, *7*, 10402-10413, doi:10.18632/oncotarget.7224.
- 1965 203. Cornelison, R.; Dobbin, Z.C.; Katre, A.A.; Jeong, D.H.; Zhang, Y.; Chen, D.;  
1966 Petrova, Y.; Llana, D.C.; Steg, A.D.; Parsons, L., et al. Targeting RNA-  
1967 Polymerase I in Both Chemosensitive and Chemoresistant Populations in  
1968 Epithelial Ovarian Cancer. *Clin Cancer Res* **2017**, *23*, 6529-6540,  
1969 doi:10.1158/1078-0432.CCR-17-0282.
- 1970 204. Lee, H.C.; Wang, H.; Baladandayuthapani, V.; Lin, H.; He, J.; Jones, R.J.; Kuitse,  
1971 I.; Gu, D.; Wang, Z.; Ma, W., et al. RNA Polymerase I Inhibition with CX-5461 as  
1972 a Novel Therapeutic Strategy to Target MYC in Multiple Myeloma. *Br J*  
1973 *Haematol* **2017**, *177*, 80-94, doi:10.1111/bjh.14525.
- 1974 205. Rossetti, S.; Wierzbicki, A.J.; Sacchi, N. Undermining ribosomal RNA  
1975 transcription in both the nucleolus and mitochondrion: an offbeat approach  
1976 to target MYC-driven cancer. *Oncotarget* **2018**, *9*, 5016-5031,  
1977 doi:10.18632/oncotarget.23579.
- 1978 206. Linden, M.; Segersten, U.; Runeson, M.; Wester, K.; Busch, C.; Pettersson, U.;  
1979 Lind, S.B.; Malmstrom, P.U. Tumour expression of bladder cancer-associated  
1980 urinary proteins. *BJU Int* **2013**, *112*, 407-415, doi:10.1111/j.1464-  
1981 410X.2012.11653.x.
- 1982 207. Bullock, N.; Oltean, S. The many faces of SRPK1. *J Pathol* **2017**, *241*, 437-440,  
1983 doi:10.1002/path.4846.
- 1984 208. Chen, Y.; Meng, D.; Wang, H.; Sun, R.; Wang, D.; Wang, S.; Fan, J.; Zhao, Y.;  
1985 Wang, J.; Yang, S., et al. VAMP8 facilitates cellular proliferation and

- 1986 temozolomide resistance in human glioma cells. *Neuro Oncol* **2015**, *17*, 407-  
1987 418, doi:10.1093/neuonc/nou219.
- 1988 209. Yuan, M.; Liao, J.; Luo, J.; Cui, M.; Jin, F. Significance of Vesicle-Associated  
1989 Membrane Protein 8 Expression in Predicting Survival in Breast Cancer. *J*  
1990 *Breast Cancer* **2018**, *21*, 399-405, doi:10.4048/jbc.2018.21.e57.
- 1991 210. Grunnet, M.; Calatayud, D.; Schultz, N.A.; Hasselby, J.P.; Mau-Sorensen, M.;  
1992 Brunner, N.; Stenvang, J. TOP1 gene copy numbers are increased in cancers of  
1993 the bile duct and pancreas. *Scand J Gastroenterol* **2015**, *50*, 485-494,  
1994 doi:10.3109/00365521.2014.980318.
- 1995 211. Sun, L.; Xu, X.; Chen, Y.; Zhou, Y.; Tan, R.; Qiu, H.; Jin, L.; Zhang, W.; Fan, R.;  
1996 Hong, W., et al. Rab34 regulates adhesion, migration, and invasion of breast  
1997 cancer cells. *Oncogene* **2018**, *37*, 3698-3714, doi:10.1038/s41388-018-0202-  
1998 7.
- 1999 212. Wu, J.; Lu, Y.; Qin, A.; Qiao, Z.; Jiang, X. Overexpression of RAB34 correlates  
2000 with poor prognosis and tumor progression in hepatocellular carcinoma.  
2001 *Oncol Rep* **2017**, *38*, 2967-2974, doi:10.3892/or.2017.5957.
- 2002 213. Wang, H.J.; Gao, Y.; Chen, L.; Li, Y.L.; Jiang, C.L. RAB34 was a progression- and  
2003 prognosis-associated biomarker in gliomas. *Tumour Biol* **2015**, *36*, 1573-  
2004 1578, doi:10.1007/s13277-014-2732-0.
- 2005 214. Artero-Castro, A.; Castellvi, J.; Garcia, A.; Hernandez, J.; Ramon y Cajal, S.;  
2006 Lleonart, M.E. Expression of the ribosomal proteins Rplp0, Rplp1, and Rplp2  
2007 in gynecologic tumors. *Hum Pathol* **2011**, *42*, 194-203,  
2008 doi:10.1016/j.humpath.2010.04.020.
- 2009 215. Sendoel, A.; Dunn, J.G.; Rodriguez, E.H.; Naik, S.; Gomez, N.C.; Hurwitz, B.;  
2010 Levorse, J.; Dill, B.D.; Schramek, D.; Molina, H., et al. Translation from  
2011 unconventional 5' start sites drives tumour initiation. *Nature* **2017**, *541*, 494-  
2012 499, doi:10.1038/nature21036.
- 2013 216. Neklesa, T.K.; Davis, R.W. A genome-wide screen for regulators of TORC1 in  
2014 response to amino acid starvation reveals a conserved Npr2/3 complex. *PLoS*  
2015 *Genet* **2009**, *5*, e1000515, doi:10.1371/journal.pgen.1000515.
- 2016 217. Wu, X.; Tu, B.P. Selective regulation of autophagy by the Iml1-Npr2-Npr3  
2017 complex in the absence of nitrogen starvation. *Molecular biology of the cell*  
2018 **2011**, *22*, 4124-4133, doi:10.1091/mbc.E11-06-0525.
- 2019 218. Sardon, A.M.; Tarsio, M.; Kane, P.M. The RAVE complex is essential for  
2020 stable assembly of the yeast V-ATPase. *The Journal of biological chemistry*  
2021 **2002**, *277*, 13831-13839, doi:10.1074/jbc.M200682200.
- 2022 219. Seol, J.H.; Shevchenko, A.; Shevchenko, A.; Deshaies, R.J. Skp1 forms multiple  
2023 protein complexes, including RAVE, a regulator of V-ATPase assembly.  
2024 *Nature cell biology* **2001**, *3*, 384-391, doi:10.1038/35070067.
- 2025 220. Nakamura, N.; Matsuura, A.; Wada, Y.; Ohsumi, Y. Acidification of vacuoles is  
2026 required for autophagic degradation in the yeast, *Saccharomyces cerevisiae*. *J*  
2027 *Biochem* **1997**, *121*, 338-344.
- 2028 221. Yang, Z.; Geng, J.; Yen, W.L.; Wang, K.; Klionsky, D.J. Positive or negative roles  
2029 of different cyclin-dependent kinase Pho85-cyclin complexes orchestrate  
2030 induction of autophagy in *Saccharomyces cerevisiae*. *Molecular cell* **2010**, *38*,  
2031 250-264, doi:10.1016/j.molcel.2010.02.033.

- 2032 222. Wollert, T.; Wunder, C.; Lippincott-Schwartz, J.; Hurley, J.H. Membrane  
2033 scission by the ESCRT-III complex. *Nature* **2009**, *458*, 172-177,  
2034 doi:10.1038/nature07836.
- 2035 223. Richter, C.M.; West, M.; Odorizzi, G. Doa4 function in ILV budding is restricted  
2036 through its interaction with the Vps20 subunit of ESCRT-III. *Journal of cell*  
2037 *science* **2013**, *126*, 1881-1890, doi:10.1242/jcs.122499.
- 2038 224. Mukubou, H.; Tsujimura, T.; Sasaki, R.; Ku, Y. The role of autophagy in the  
2039 treatment of pancreatic cancer with gemcitabine and ionizing radiation. *Int J*  
2040 *Oncol* **2010**, *37*, 821-828.
- 2041 225. Hashimoto, D.; Blauer, M.; Hirota, M.; Ikonen, N.H.; Sand, J.; Laukkanen, J.  
2042 Autophagy is needed for the growth of pancreatic adenocarcinoma and has a  
2043 cytoprotective effect against anticancer drugs. *Eur J Cancer* **2014**, *50*, 1382-  
2044 1390, doi:10.1016/j.ejca.2014.01.011.
- 2045 226. Chen, M.; He, M.; Song, Y.; Chen, L.; Xiao, P.; Wan, X.; Dai, F.; Shen, P. The  
2046 cytoprotective role of gemcitabine-induced autophagy associated with  
2047 apoptosis inhibition in triple-negative MDA-MB-231 breast cancer cells. *Int J*  
2048 *Mol Med* **2014**, *34*, 276-282, doi:10.3892/ijmm.2014.1772.
- 2049 227. Beilharz, T.H.; Harrison, P.F.; Miles, D.M.; See, M.M.; Le, U.M.; Kalanon, M.;  
2050 Curtis, M.J.; Hasan, Q.; Saksouk, J.; Margaritis, T., et al. Coordination of Cell  
2051 Cycle Progression and Mitotic Spindle Assembly Involves Histone H3 Lysine  
2052 4 Methylation by Set1/COMPASS. *Genetics* **2017**, *205*, 185-199,  
2053 doi:10.1534/genetics.116.194852.
- 2054 228. Miller, T.; Krogan, N.J.; Dover, J.; Erdjument-Bromage, H.; Tempst, P.;  
2055 Johnston, M.; Greenblatt, J.F.; Shilatifard, A. COMPASS: a complex of proteins  
2056 associated with a trithorax-related SET domain protein. *Proceedings of the*  
2057 *National Academy of Sciences of the United States of America* **2001**, *98*, 12902-  
2058 12907, doi:10.1073/pnas.231473398.
- 2059 229. Shilatifard, A. The COMPASS family of histone H3K4 methylases: mechanisms  
2060 of regulation in development and disease pathogenesis. *Annu Rev Biochem*  
2061 **2012**, *81*, 65-95, doi:10.1146/annurev-biochem-051710-134100.
- 2062 230. Greer, E.L.; Shi, Y. Histone methylation: a dynamic mark in health, disease and  
2063 inheritance. *Nat Rev Genet* **2012**, *13*, 343-357, doi:10.1038/nrg3173.
- 2064 231. Dehe, P.M.; Dichtl, B.; Schaft, D.; Roguev, A.; Pamblanco, M.; Lebrun, R.;  
2065 Rodriguez-Gil, A.; Mkandawire, M.; Landsberg, K.; Shevchenko, A., et al.  
2066 Protein interactions within the Set1 complex and their roles in the regulation  
2067 of histone 3 lysine 4 methylation. *J Biol Chem* **2006**, *281*, 35404-35412,  
2068 doi:10.1074/jbc.M603099200.
- 2069 232. Alvarado, A.G.; Thiagarajan, P.S.; Mulkearns-Hubert, E.E.; Silver, D.J.; Hale, J.S.;  
2070 Alban, T.J.; Turaga, S.M.; Jarrar, A.; Reizes, O.; Longworth, M.S., et al.  
2071 Glioblastoma Cancer Stem Cells Evade Innate Immune Suppression of Self-  
2072 Renewal through Reduced TLR4 Expression. *Cell Stem Cell* **2017**, *20*, 450-461  
2073 e454, doi:10.1016/j.stem.2016.12.001.
- 2074 233. Lu, C.; Yang, D.; Sabbatini, M.E.; Colby, A.H.; Grinstaff, M.W.; Oberlies, N.H.;  
2075 Pearce, C.; Liu, K. Contrasting roles of H3K4me3 and H3K9me3 in regulation  
2076 of apoptosis and gemcitabine resistance in human pancreatic cancer cells.  
2077 *BMC Cancer* **2018**, *18*, 149, doi:10.1186/s12885-018-4061-y.

- 2078 234. Li, D.; Sun, H.; Sun, W.J.; Bao, H.B.; Si, S.H.; Fan, J.L.; Lin, P.; Cui, R.J.; Pan, Y.J.;  
2079 Wen, S.M., et al. Role of RbBP5 and H3K4me3 in the vicinity of Snail  
2080 transcription start site during epithelial-mesenchymal transition in prostate  
2081 cancer cell. *Oncotarget* **2016**, *7*, 65553-65567,  
2082 doi:10.18632/oncotarget.11549.
- 2083 235. Zhou, H.; Bao, J.; Zhu, X.; Dai, G.; Jiang, X.; Jiao, X.; Sheng, H.; Huang, J.; Yu, H.  
2084 Retinoblastoma Binding Protein 5 Correlates with the Progression in  
2085 Hepatocellular Carcinoma. *Biomed Res Int* **2018**, *2018*, 1073432,  
2086 doi:10.1155/2018/1073432.
- 2087 236. Telles, E.; Seto, E. Modulation of cell cycle regulators by HDACs. *Front Biosci*  
2088 (*Schol Ed*) **2012**, *4*, 831-839.
- 2089 237. Seto, E.; Yoshida, M. Erasers of histone acetylation: the histone deacetylase  
2090 enzymes. *Cold Spring Harb Perspect Biol* **2014**, *6*, a018713,  
2091 doi:10.1101/cshperspect.a018713.
- 2092 238. Wu, J.; Carmen, A.A.; Kobayashi, R.; Suka, N.; Grunstein, M. HDA2 and HDA3  
2093 are related proteins that interact with and are essential for the activity of the  
2094 yeast histone deacetylase HDA1. *Proceedings of the National Academy of*  
2095 *Sciences of the United States of America* **2001**, *98*, 4391-4396,  
2096 doi:10.1073/pnas.081560698.
- 2097 239. Alic, N.; Higgins, V.J.; Dawes, I.W. Identification of a *Saccharomyces cerevisiae*  
2098 gene that is required for G1 arrest in response to the lipid oxidation product  
2099 linoleic acid hydroperoxide. *Mol Biol Cell* **2001**, *12*, 1801-1810,  
2100 doi:10.1091/mbc.12.6.1801.
- 2101 240. Alic, N.; Higgins, V.J.; Pichova, A.; Breitenbach, M.; Dawes, I.W. Lipid  
2102 hydroperoxides activate the mitogen-activated protein kinase Mpk1p in  
2103 *Saccharomyces cerevisiae*. *J Biol Chem* **2003**, *278*, 41849-41855,  
2104 doi:10.1074/jbc.M307760200.
- 2105 241. Addinall, S.G.; Downey, M.; Yu, M.; Zubko, M.K.; Dewar, J.; Leake, A.; Hallinan,  
2106 J.; Shaw, O.; James, K.; Wilkinson, D.J., et al. A genomewide suppressor and  
2107 enhancer analysis of *cdc13-1* reveals varied cellular processes influencing  
2108 telomere capping in *Saccharomyces cerevisiae*. *Genetics* **2008**, *180*, 2251-  
2109 2266, doi:genetics.108.092577 [pii]  
2110 10.1534/genetics.108.092577.
- 2111 242. van der Veen, A.G.; Ploegh, H.L. Ubiquitin-like proteins. *Annu Rev Biochem*  
2112 **2012**, *81*, 323-357, doi:10.1146/annurev-biochem-093010-153308.
- 2113 243. Judes, A.; Bruch, A.; Klassen, R.; Helm, M.; Schaffrath, R. Sulfur transfer and  
2114 activation by ubiquitin-like modifier system Uba4\*Urm1 link protein  
2115 urmylation and tRNA thiolation in yeast. *Microb Cell* **2016**, *3*, 554-564,  
2116 doi:10.15698/mic2016.11.539.
- 2117 244. Nakai, Y.; Nakai, M.; Hayashi, H. Thio-modification of yeast cytosolic tRNA  
2118 requires a ubiquitin-related system that resembles bacterial sulfur transfer  
2119 systems. *The Journal of biological chemistry* **2008**, *283*, 27469-27476,  
2120 doi:10.1074/jbc.M804043200.
- 2121 245. Noma, A.; Sakaguchi, Y.; Suzuki, T. Mechanistic characterization of the sulfur-  
2122 relay system for eukaryotic 2-thiouridine biogenesis at tRNA wobble  
2123 positions. *Nucleic Acids Res* **2009**, *37*, 1335-1352, doi:10.1093/nar/gkn1023.

- 2124 246. Hawer, H.; Hammermeister, A.; Ravichandran, K.E.; Glatt, S.; Schaffrath, R.;  
2125 Klassen, R. Roles of Elongator Dependent tRNA Modification Pathways in  
2126 Neurodegeneration and Cancer. *Genes (Basel)* **2018**, *10*,  
2127 doi:10.3390/genes10010019.
- 2128 247. Rapino, F.; Delaunay, S.; Rambow, F.; Zhou, Z.; Tharun, L.; De Tullio, P.; Sin, O.;  
2129 Shostak, K.; Schmitz, S.; Piepers, J., et al. Codon-specific translation  
2130 reprogramming promotes resistance to targeted therapy. *Nature* **2018**, *558*,  
2131 605-609, doi:10.1038/s41586-018-0243-7.
- 2132 248. Plunkett, W.; Huang, P.; Searcy, C.E.; Gandhi, V. Gemcitabine: preclinical  
2133 pharmacology and mechanisms of action. *Semin Oncol* **1996**, *23*, 3-15.
- 2134 249. Wong, A.; Soo, R.A.; Yong, W.P.; Innocenti, F. Clinical pharmacology and  
2135 pharmacogenetics of gemcitabine. *Drug Metab Rev* **2009**, *41*, 77-88,  
2136 doi:10.1080/03602530902741828.
- 2137 250. Krishnan, P.; Fu, Q.; Lam, W.; Liou, J.Y.; Dutschman, G.; Cheng, Y.C.  
2138 Phosphorylation of pyrimidine deoxynucleoside analog diphosphates:  
2139 selective phosphorylation of L-nucleoside analog diphosphates by 3-  
2140 phosphoglycerate kinase. *J Biol Chem* **2002**, *277*, 5453-5459,  
2141 doi:10.1074/jbc.M109025200.
- 2142 251. Flentie, K.; Gonzalez, C.; Kocher, B.; Wang, Y.; Zhu, H.; Marasa, J.; Piwnica-  
2143 Worms, D. Nucleoside Diphosphate Kinase-3 (NME3) Enhances TLR5-  
2144 Induced NFkappaB Activation. *Mol Cancer Res* **2018**, *16*, 986-999,  
2145 doi:10.1158/1541-7786.MCR-17-0603.
- 2146 252. O'Kane, G.M.; Connor, A.A.; Gallinger, S. Characterization, Detection, and  
2147 Treatment Approaches for Homologous Recombination Deficiency in Cancer.  
2148 *Trends Mol Med* **2017**, *23*, 1121-1137, doi:10.1016/j.molmed.2017.10.007.
- 2149 253. Jackson, J.C.; Lopes, J.M. The yeast UME6 gene is required for both negative  
2150 and positive transcriptional regulation of phospholipid biosynthetic gene  
2151 expression. *Nucleic Acids Res* **1996**, *24*, 1322-1329.
- 2152 254. Bae-Lee, M.S.; Carman, G.M. Phosphatidylserine synthesis in *Saccharomyces*  
2153 *cerevisiae*. Purification and characterization of membrane-associated  
2154 phosphatidylserine synthase. *The Journal of biological chemistry* **1984**, *259*,  
2155 10857-10862.
- 2156 255. Madeo, F.; Frohlich, E.; Frohlich, K.U. A yeast mutant showing diagnostic  
2157 markers of early and late apoptosis. *J Cell Biol* **1997**, *139*, 729-734.
- 2158 256. Modrak, D.E.; Cardillo, T.M.; Newsome, G.A.; Goldenberg, D.M.; Gold, D.V.  
2159 Synergistic interaction between sphingomyelin and gemcitabine potentiates  
2160 ceramide-mediated apoptosis in pancreatic cancer. *Cancer Res* **2004**, *64*,  
2161 8405-8410, doi:10.1158/0008-5472.CAN-04-2988.
- 2162 257. Modrak, D.E.; Leon, E.; Goldenberg, D.M.; Gold, D.V. Ceramide regulates  
2163 gemcitabine-induced senescence and apoptosis in human pancreatic cancer  
2164 cell lines. *Mol Cancer Res* **2009**, *7*, 890-896, doi:10.1158/1541-7786.MCR-08-  
2165 0457.
- 2166 258. Frohlich, F.; Petit, C.; Kory, N.; Christiano, R.; Hannibal-Bach, H.K.; Graham, M.;  
2167 Liu, X.; Ejsing, C.S.; Farese, R.V.; Walther, T.C. The GARP complex is required  
2168 for cellular sphingolipid homeostasis. *Elife* **2015**, *4*, doi:10.7554/eLife.08712.

- 2169 259. Hua, Z.; Fatheddin, P.; Graham, T.R. An essential subfamily of Drs2p-related  
2170 P-type ATPases is required for protein trafficking between Golgi complex and  
2171 endosomal/vacuolar system. *Molecular biology of the cell* **2002**, *13*, 3162-  
2172 3177, doi:10.1091/mbc.e02-03-0172.
- 2173 260. Pomorski, T.; Lombardi, R.; Riezman, H.; Devaux, P.F.; van Meer, G.; Holthuis,  
2174 J.C. Drs2p-related P-type ATPases Dnf1p and Dnf2p are required for  
2175 phospholipid translocation across the yeast plasma membrane and serve a  
2176 role in endocytosis. *Molecular biology of the cell* **2003**, *14*, 1240-1254,  
2177 doi:10.1091/mbc.e02-08-0501.
- 2178 261. Nakano, K.; Yamamoto, T.; Kishimoto, T.; Noji, T.; Tanaka, K. Protein kinases  
2179 Fpk1p and Fpk2p are novel regulators of phospholipid asymmetry. *Molecular*  
2180 *biology of the cell* **2008**, *19*, 1783-1797, doi:10.1091/mbc.E07-07-0646.
- 2181 262. Bastide, A.; David, A. The ribosome, (slow) beating heart of cancer (stem) cell.  
2182 *Oncogenesis* **2018**, *7*, 34, doi:10.1038/s41389-018-0044-8.
- 2183 263. Manfrini, N.; Gobbin, E.; Baldo, V.; Trovesi, C.; Lucchini, G.; Longhese, M.P.  
2184 G(1)/S and G(2)/M cyclin-dependent kinase activities commit cells to death  
2185 in the absence of the S-phase checkpoint. *Mol Cell Biol* **2012**, *32*, 4971-4985,  
2186 doi:10.1128/MCB.00956-12.
- 2187 264. Hu, X.; Lu, Z.; Yu, S.; Reilly, J.; Liu, F.; Jia, D.; Qin, Y.; Han, S.; Liu, X.; Qu, Z., et al.  
2188 CERKL regulates autophagy via the NAD-dependent deacetylase SIRT1.  
2189 *Autophagy* **2019**, *15*, 453-465, doi:10.1080/15548627.2018.1520548.
- 2190 265. Sun, F.; Xiong, Y.; Zhou, X.H.; Li, Q.; Xiao, L.; Long, P.; Li, L.J.; Cai, M.Y.; Wei, Y.X.;  
2191 Ma, Y.L., et al. Acylglycerol kinase is over-expressed in early-stage cervical  
2192 squamous cell cancer and predicts poor prognosis. *Tumour Biol* **2016**, *37*,  
2193 6729-6736, doi:10.1007/s13277-015-4498-4.
- 2194 266. Liu, N.; Wang, Z.; Cheng, Y.; Zhang, P.; Wang, X.; Yang, H.; Liu, H.; Zhang, Y.; Tu,  
2195 Y. Acylglycerol kinase functions as an oncogene and an unfavorable  
2196 prognostic marker of human gliomas. *Hum Pathol* **2016**, *58*, 105-112,  
2197 doi:10.1016/j.humpath.2016.07.034.
- 2198 267. Cui, Y.; Lin, C.; Wu, Z.; Liu, A.; Zhang, X.; Zhu, J.; Wu, G.; Wu, J.; Li, M.; Li, J., et al.  
2199 AGK enhances angiogenesis and inhibits apoptosis via activation of the NF-  
2200 kappaB signaling pathway in hepatocellular carcinoma. *Oncotarget* **2014**, *5*,  
2201 12057-12069, doi:10.18632/oncotarget.2666.
- 2202 268. Wang, X.; Lin, C.; Zhao, X.; Liu, A.; Zhu, J.; Li, X.; Song, L. Acylglycerol kinase  
2203 promotes cell proliferation and tumorigenicity in breast cancer via  
2204 suppression of the FOXO1 transcription factor. *Mol Cancer* **2014**, *13*, 106,  
2205 doi:10.1186/1476-4598-13-106.
- 2206 269. Kang, H.; Tsygankov, D.; Lew, D.J. Sensing a bud in the yeast morphogenesis  
2207 checkpoint: a role for Elm1. *Mol Biol Cell* **2016**, *27*, 1764-1775,  
2208 doi:10.1091/mbc.E16-01-0014.
- 2209 270. Choi, E.J.; Yoo, N.J.; Kim, M.S.; An, C.H.; Lee, S.H. Putative Tumor Suppressor  
2210 Genes EGR1 and BRSK1 Are Mutated in Gastric and Colorectal Cancers.  
2211 *Oncology* **2016**, *91*, 289-294, doi:10.1159/000450616.
- 2212 271. Wang, H.; Liu, X.B.; Chen, J.H.; Wang, Q.Q.; Chen, J.P.; Xu, J.F.; Sheng, C.Y.; Ni,  
2213 Q.C. Decreased expression and prognostic role of cytoplasmic BRSK1 in  
2214 human breast carcinoma: correlation with Jab1 stability and PI3K/Akt



- 2215 pathway. *Exp Mol Pathol* **2014**, *97*, 191-201,  
2216 doi:10.1016/j.yexmp.2014.07.012.
- 2217 272. Saiyin, H.; Na, N.; Han, X.; Fang, Y.; Wu, Y.; Lou, W.; Yang, X. BRSK2 induced by  
2218 nutrient deprivation promotes Akt activity in pancreatic cancer via  
2219 downregulation of mTOR activity. *Oncotarget* **2017**, *8*, 44669-44681,  
2220 doi:10.18632/oncotarget.17965.
- 2221 273. Ye, Y.; Gu, B.; Wang, Y.; Shen, S.; Huang, W. E2F1-mediated MNX1-AS1-miR-  
2222 218-5p-SEC61A1 feedback loop contributes to the progression of colon  
2223 adenocarcinoma. *Journal of cellular biochemistry* **2019**, *120*, 6145-6153,  
2224 doi:10.1002/jcb.27902.
- 2225 274. Phan, N.N.; Wang, C.Y.; Chen, C.F.; Sun, Z.; Lai, M.D.; Lin, Y.C. Voltage-gated  
2226 calcium channels: Novel targets for cancer therapy. *Oncol Lett* **2017**, *14*,  
2227 2059-2074, doi:10.3892/ol.2017.6457.
- 2228 275. Liu, K.T.; Yeh, I.J.; Chou, S.K.; Yen, M.C.; Kuo, P.L. Regulatory mechanism of  
2229 fatty acidCoA metabolic enzymes under endoplasmic reticulum stress in lung  
2230 cancer. *Oncol Rep* **2018**, *40*, 2674-2682, doi:10.3892/or.2018.6664.
- 2231 276. Furuta, J.; Nobeyama, Y.; Umabayashi, Y.; Otsuka, F.; Kikuchi, K.; Ushijima, T.  
2232 Silencing of Peroxiredoxin 2 and aberrant methylation of 33 CpG islands in  
2233 putative promoter regions in human malignant melanomas. *Cancer Res* **2006**,  
2234 *66*, 6080-6086, doi:10.1158/0008-5472.CAN-06-0157.
- 2235 277. Gao, Y.; Wang, W.; Cao, J.; Wang, F.; Geng, Y.; Cao, J.; Xu, X.; Zhou, J.; Liu, P.;  
2236 Zhang, S. Upregulation of AUF1 is involved in the proliferation of esophageal  
2237 squamous cell carcinoma through GCH1. *Int J Oncol* **2016**, *49*, 2001-2010,  
2238 doi:10.3892/ijo.2016.3713.
- 2239 278. Mocino-Rodriguez, M.D.; Santillan-Benitez, J.G.; Dozal-Dominguez, D.S.;  
2240 Hernandez-Navarro, M.D.; Flores-Merino, M.V.; Sandoval-Cabrera, A.; Garcia  
2241 Vazquez, F.J. Expression of AdipoR1 and AdipoR2 Receptors as Leptin-Breast  
2242 Cancer Regulation Mechanisms. *Dis Markers* **2017**, *2017*, 4862016,  
2243 doi:10.1155/2017/4862016.
- 2244 279. Wang, L.; Collings, C.K.; Zhao, Z.; Cozzolino, K.A.; Ma, Q.; Liang, K.; Marshall,  
2245 S.A.; Sze, C.C.; Hashizume, R.; Savas, J.N., et al. A cytoplasmic COMPASS is  
2246 necessary for cell survival and triple-negative breast cancer pathogenesis by  
2247 regulating metabolism. *Genes Dev* **2017**, *31*, 2056-2066,  
2248 doi:10.1101/gad.306092.117.
- 2249 280. Ross, J.B.; Huh, D.; Noble, L.B.; Tavazoie, S.F. Identification of molecular  
2250 determinants of primary and metastatic tumour re-initiation in breast  
2251 cancer. *Nature cell biology* **2015**, *17*, 651-664, doi:10.1038/ncb3148.
- 2252 281. Bhise, N.S.; Chauhan, L.; Shin, M.; Cao, X.; Pounds, S.; Lamba, V.; Lamba, J.K.  
2253 MicroRNA-mRNA Pairs Associated with Outcome in AML: From In Vitro Cell-  
2254 Based Studies to AML Patients. *Front Pharmacol* **2015**, *6*, 324,  
2255 doi:10.3389/fphar.2015.00324.
- 2256 282. Tenreiro, S.; Outeiro, T.F. Simple is good: yeast models of neurodegeneration.  
2257 *FEMS Yeast Res* **2010**, *10*, 970-979, doi:10.1111/j.1567-1364.2010.00649.x.
- 2258 283. Billant, O.; Blondel, M.; Voisset, C. p53, p63 and p73 in the wonderland of *S.*  
2259 *cerevisiae*. *Oncotarget* **2017**, *8*, 57855-57869,  
2260 doi:10.18632/oncotarget.18506.

- 2261 284. Rodriguez-Escudero, I.; Roelants, F.M.; Thorner, J.; Nombela, C.; Molina, M.;  
2262 Cid, V.J. Reconstitution of the mammalian PI3K/PTEN/Akt pathway in yeast.  
2263 *Biochem J* **2005**, *390*, 613-623, doi:10.1042/BJ20050574.
- 2264 285. Hamza, A.; Tammperre, E.; Kofoed, M.; Keong, C.; Chiang, J.; Giaever, G.; Nislow,  
2265 C.; Hieter, P. Complementation of Yeast Genes with Human Genes as an  
2266 Experimental Platform for Functional Testing of Human Genetic Variants.  
2267 *Genetics* **2015**, *201*, 1263-1274, doi:10.1534/genetics.115.181099.
- 2268 286. Sun, S.; Yang, F.; Tan, G.; Costanzo, M.; Oughtred, R.; Hirschman, J.; Theesfeld,  
2269 C.L.; Bansal, P.; Sahni, N.; Yi, S., et al. An extended set of yeast-based  
2270 functional assays accurately identifies human disease mutations. *Genome Res*  
2271 **2016**, *26*, 670-680, doi:10.1101/gr.192526.115.
- 2272 287. Kachroo, A.H.; Laurent, J.M.; Yellman, C.M.; Meyer, A.G.; Wilke, C.O.; Marcotte,  
2273 E.M. Evolution. Systematic humanization of yeast genes reveals conserved  
2274 functions and genetic modularity. *Science* **2015**, *348*, 921-925,  
2275 doi:10.1126/science.aaa0769.
- 2276 288. Tardiff, D.F.; Khurana, V.; Chung, C.Y.; Lindquist, S. From yeast to patient  
2277 neurons and back again: powerful new discovery platform. *Mov Disord* **2014**,  
2278 *29*, 1231-1240, doi:10.1002/mds.25989.
- 2279 289. Veit, G.; Oliver, K.; Apaja, P.M.; Perdomo, D.; Bidaud-Meynard, A.; Lin, S.T.;  
2280 Guo, J.; Icyuz, M.; Sorscher, E.J.; Hartman, J.I., et al. Ribosomal Stalk Protein  
2281 Silencing Partially Corrects the DeltaF508-CFTR Functional Expression  
2282 Defect. *PLoS biology* **2016**, *14*, e1002462, doi:10.1371/journal.pbio.1002462.
- 2283 290. Costanzo, M.; Kuzmin, E.; van Leeuwen, J.; Mair, B.; Moffat, J.; Boone, C.;  
2284 Andrews, B. Global Genetic Networks and the Genotype-to-Phenotype  
2285 Relationship. *Cell* **2019**, *177*, 85-100, doi:10.1016/j.cell.2019.01.033.
- 2286 291. Breslow, D.K.; Cameron, D.M.; Collins, S.R.; Schuldiner, M.; Stewart-Ornstein,  
2287 J.; Newman, H.W.; Braun, S.; Madhani, H.D.; Krogan, N.J.; Weissman, J.S. A  
2288 comprehensive strategy enabling high-resolution functional analysis of the  
2289 yeast genome. *Nat Methods* **2008**, *5*, 711-718, doi:10.1038/nmeth.1234.  
2290
